# Supplementary material for: Copper(ii)-catalyzed oxidative ipso-annulation of N-arylpropiolamides and biaryl ynones with 1,3-diketones: construction of diketoalkyl spiro-trienones
Source: Royal Society of Chemistry journal article supplement (doi:10.1039/d2ob01282k), 2022-01-01

**Copper(II)-Catalyzed Oxidative *ipso*-Annulation of *N*-Arylpropiolamides and Biaryl  
Ynones with 1,3-Diketones: Construction of Diketoalkyl Spiro-trienones**

Chada Raji Reddy\*, Dattahari H. Kolgave, Uprety Ajaykumar and Remya Ramesh

Department of Organic Synthesis & Process Chemistry, CSIR-Indian Institute of Chemical  
Technology, Hyderabad 500007, India

|                                                                                                            |                                   |
|------------------------------------------------------------------------------------------------------------|-----------------------------------|
| 1. Table of contents.                                                                                      | S <sub>1</sub>                    |
| 2. Structures of starting materials                                                                        | S <sub>2</sub>                    |
| 3. Control Experiment                                                                                      | S <sub>3</sub>                    |
| 4. X-ray Crystallography                                                                                   | S <sub>3</sub> - S <sub>6</sub>   |
| 5. <sup>1</sup> H NMR, <sup>13</sup> C NMR and <sup>19</sup> F NMR<br>spectral copies of all new compounds | S <sub>8</sub> - S <sub>72</sub>  |
| 6. HRMS copies of control experiments.                                                                     | S <sub>73</sub> - S <sub>74</sub> |

## 2. Structures of starting materials

All the starting materials (**1a** to **1e**, **1g**, **1i** to **1o**)<sup>3</sup>, (**1f**)<sup>4</sup>, (**1h**)<sup>1</sup>, (**4a** to **4h**)<sup>2</sup> and (**4i**)<sup>5</sup> were prepared based on literature reports, and the spectral data was compared.

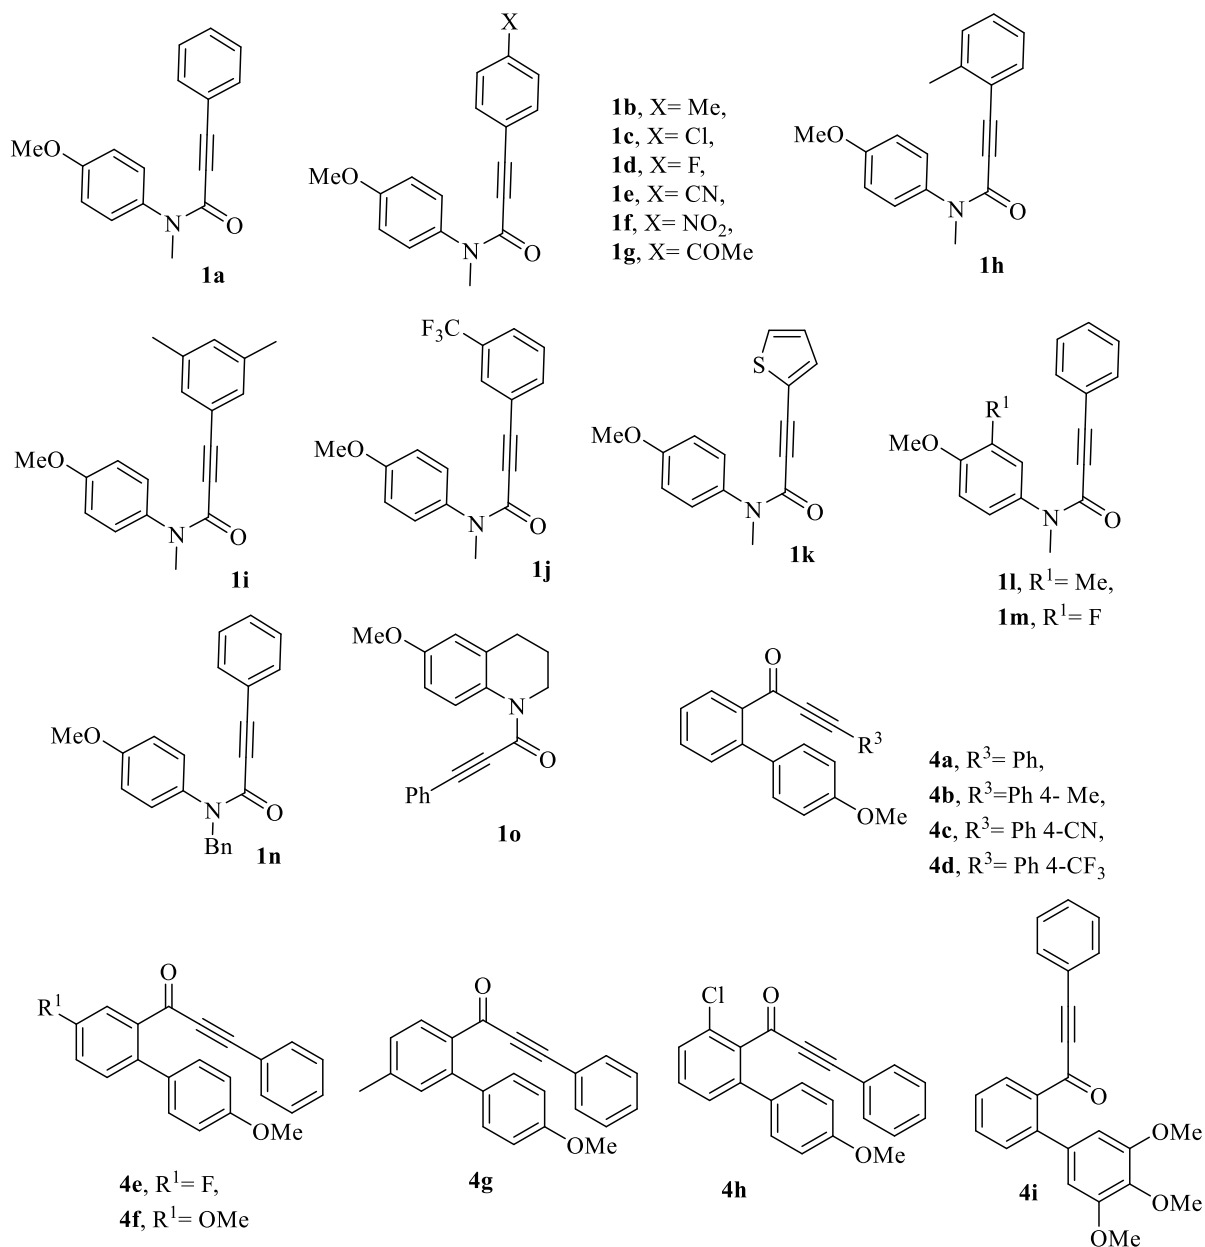

### 3. Control experiments

#### Radical trapping experiment

When the Reaction of a mixture of **1a** and **2a** under the standard conditions was performed in the presence of 2.0 equiv of TEMPO, radical scavengers, **3a** was not formed.

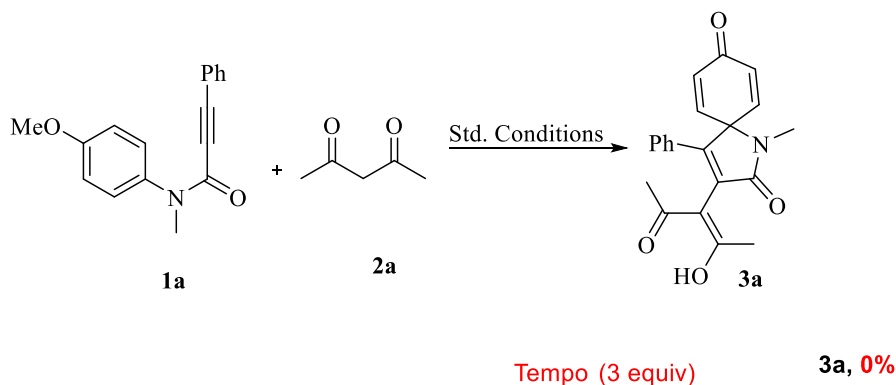

### 4. X-ray Crystallography.

X-ray data for the compounds **3a**, **3r** and **5a** were collected at room temperature on a Bruker D8 QUEST instrument with an I $\mu$ S Mo microsource ( $\lambda = 0.7107$  Å) and a PHOTON-III detector. The raw data frames were reduced and corrected for absorption effects using the Bruker Apex 3 software suite programs.<sup>6</sup> The structure was solved using the intrinsic phasing method and further refined with the SHELXL program and expanded using Fourier techniques.<sup>7</sup> Anisotropic displacement parameters were included for all non-hydrogen atoms. O-bound H atom was located in the difference density map and their positions and isotropic displacement parameters were refined. All C bound H atoms were positioned geometrically and treated as riding on their parent C atoms [C-H = 0.93-0.97 Å, and U<sub>iso</sub>(H) = 1.5U<sub>eq</sub>(C) for methyl H or 1.2U<sub>eq</sub>(C) for other H atoms].

#### A. Crystal structure determination of **3a**

**Crystal Data** for C<sub>21</sub>H<sub>19</sub>NO<sub>4</sub> ( $M = 349.37$  g/mol): monoclinic, space group P2<sub>1</sub> (no. 4),  $a = 8.7602(3)$  Å,  $b = 10.6004(3)$  Å,  $c = 10.5707(3)$  Å,  $\beta = 111.3688(9)^\circ$ ,  $V = 914.13(5)$  Å<sup>3</sup>,  $Z = 2$ ,  $T = 294.15$  K,  $\mu(\text{MoK}\alpha) = 0.088$  mm<sup>-1</sup>,  $D_{\text{calc}} = 1.269$  g/cm<sup>3</sup>, 18725 reflections measured ( $4.994^\circ \leq 2\theta \leq 61.186^\circ$ ), 5491 unique ( $R_{\text{int}} = 0.0724$ ,  $R_{\text{sigma}} = 0.0853$ ) which were used in all calculations. The final  $R_1$  was 0.0534 ( $I > 2\sigma(I)$ ) and  $wR_2$  was 0.1511 (all data). CCDC No. 2171887 deposition numbers contains the supplementary crystallographic data for this paper which can be obtained free of charge at <https://www.ccdc.cam.ac.uk/structures/>

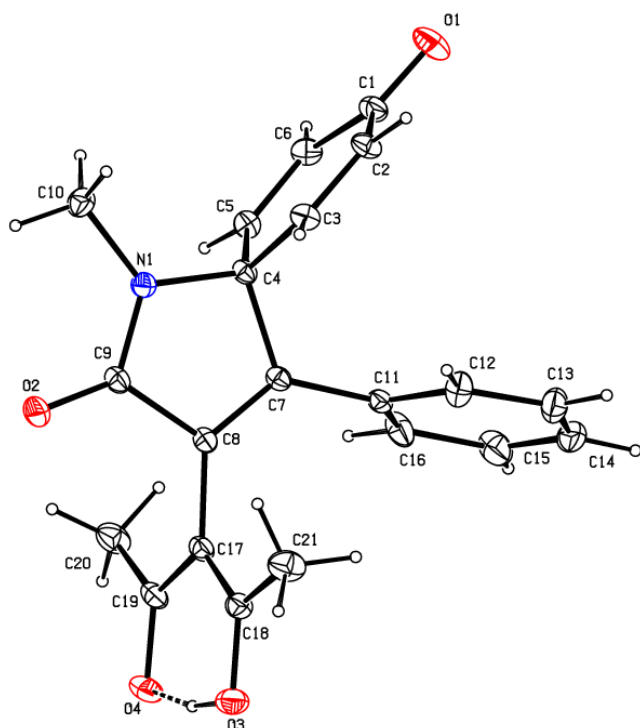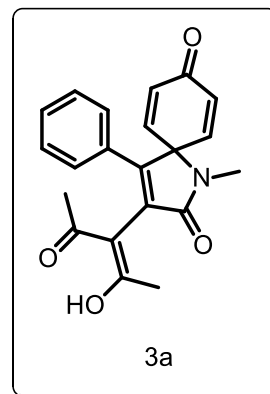

## B. Crystal structure determination of 3r

**Crystal Data** for  $C_{27}H_{31}NO_4$  ( $M = 433.551$  g/mol): triclinic, space group P-1 (no. 2),  $a = 10.0686(7)$  Å,  $b = 10.3684(7)$  Å,  $c = 12.3317(8)$  Å,  $\alpha = 72.123(2)^\circ$ ,  $\beta = 80.904(2)^\circ$ ,  $\gamma = 87.167(2)^\circ$ ,  $V = 1209.80(14)$  Å<sup>3</sup>,  $Z = 2$ ,  $T = 294.15$  K,  $\mu(\text{Mo K}\alpha) = 0.079$  mm<sup>-1</sup>,  $D_{\text{calc}} = 1.190$  g/cm<sup>3</sup>, 23612 reflections measured ( $5.78^\circ \leq 2\theta \leq 61.1^\circ$ ), 7363 unique ( $R_{\text{int}} = 0.0382$ ,  $R_{\text{sigma}} = 0.0484$ ) which were used in all calculations. The final  $R_1$  was 0.0516 ( $I \geq 2\sigma(I)$ ) and  $wR_2$  was 0.1409 (all data). CCDC No. 2171885 deposition numbers contains the supplementary crystallographic data for this paper which can be obtained free of charge at <https://www.ccdc.cam.ac.uk/structures/>

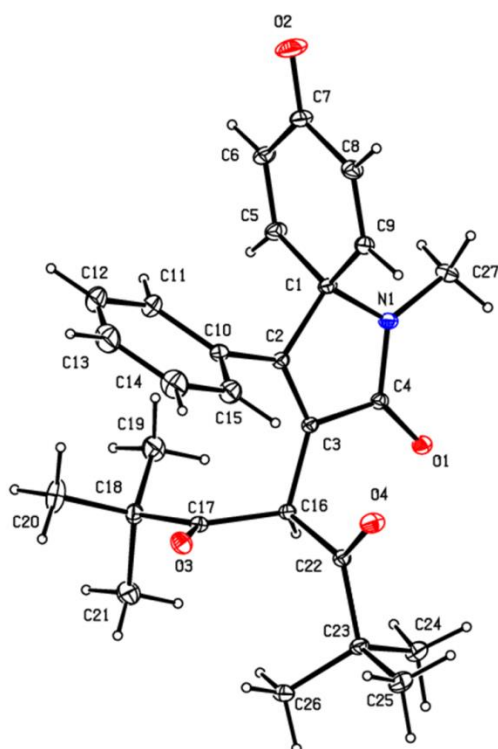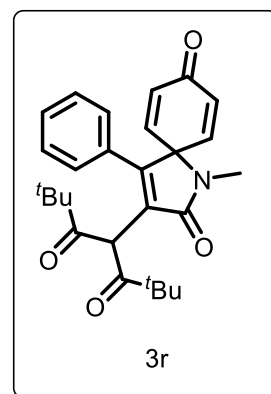

### C. Crystal structure determination of 5a

**Crystal Data** for  $C_{26}H_{20}O_4$  ( $M = 396.42$  g/mol): monoclinic, space group  $P2_1/c$  (no. 14),  $a = 18.8869(12)$  Å,  $b = 12.5379(18)$  Å,  $c = 9.037(3)$  Å,  $\beta = 99.986(5)^\circ$ ,  $V = 2107.7(7)$  Å<sup>3</sup>,  $Z = 4$ ,  $T = 294.15$  K,  $\mu(\text{MoK}\alpha) = 0.084$  mm<sup>-1</sup>,  $D_{\text{calc}} = 1.249$  g/cm<sup>3</sup>, 25169 reflections measured ( $2.19^\circ \leq 2\theta \leq 61.018^\circ$ ), 6186 unique ( $R_{\text{int}} = 0.0455$ ,  $R_{\text{sigma}} = 0.0570$ ) which were used in all calculations. The final  $R_1$  was 0.0583 ( $I > 2\sigma(I)$ ) and  $wR_2$  was 0.1743 (all data). CCDC No. 2171886 deposition numbers contains the supplementary crystallographic data for this paper which can be obtained free of charge at <https://www.ccdc.cam.ac.uk/structures/>

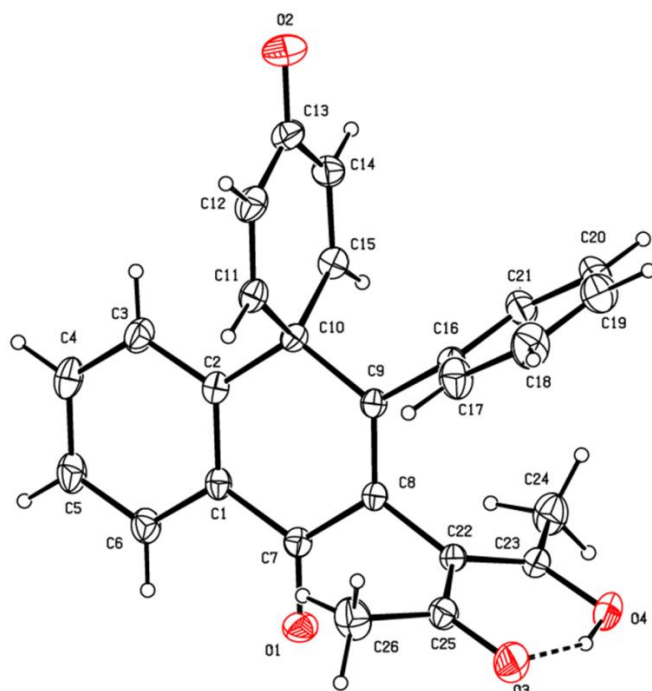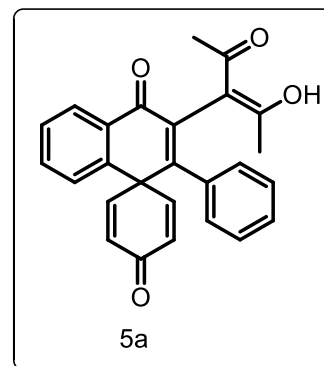

Displacement ellipsoids are drawn at the 30% probability level and H atoms are shown as small spheres of arbitrary radius

#### References:

- 1) Yu, K.; Kong, X.; Yang, J.; Li, G.; Xu, B.; Chen, Q. Electrochemical Oxidative Halogenation of *N*-Aryl Alkynamides for the Synthesis of Spiro[4.5]trienones *J. Org. Chem.* **2021**, *86*, 917–928.
- 2) Raji Reddy, C.; Kolgave, D. H. Electrochemical Selenylative Carbannulation of Biaryl Ynones to Seleno-Dibenzocycloheptenones/ Spiro[5.5]Trienones. *J. Org. Chem.* **2021**, *86*, 17071–17081.
- 3) Raji Reddy, C.; Kolgave, D. H.; Subbarao, M.; Aila, M.; Prajapati, S. K. Ag-Catalyzed Oxidative ipso-Cyclization via Decarboxylative Acylation/Alkylation: Access to 3-Acyl/Alkyl-spiro[4.5]-trienones. *Org. Lett.* **2020**, *22*, 5342–5346.
- 4) Raji Reddy, C.; Uprety, A.; Kolgave, D. H. Expedient Access to Spiro-Fused 2,5-Cyclohexadienones via Thio(seleno)-cyanative ipso-Cyclization. *J. Org. Chem.* **2020**, *85*, 15521–15531.
- 5) Zhang, M-M.; Shen, L-Y.; Dong, S.; Li, B.; Meng, F.; Si, W-J.; Yang, W-C. DTBP-Mediated Cascade Spirocyclization and Dearomatization of Biaryl Ynones: Facile Access to Spiro [5.5]trienones through C(sp<sup>3</sup>)-H Bond Functionalization. *Eur. J. Org. Chem.* **2021**, *31*, 4465–4468.

6) Bruker (2016). APEX3, SAINT and SADABS. Bruker AXS, Inc., Madison, Wisconsin, USA.

7) Sheldrick G. M. (2015). Acta Crystallogr C71: 3-8.

DATTA-M0009

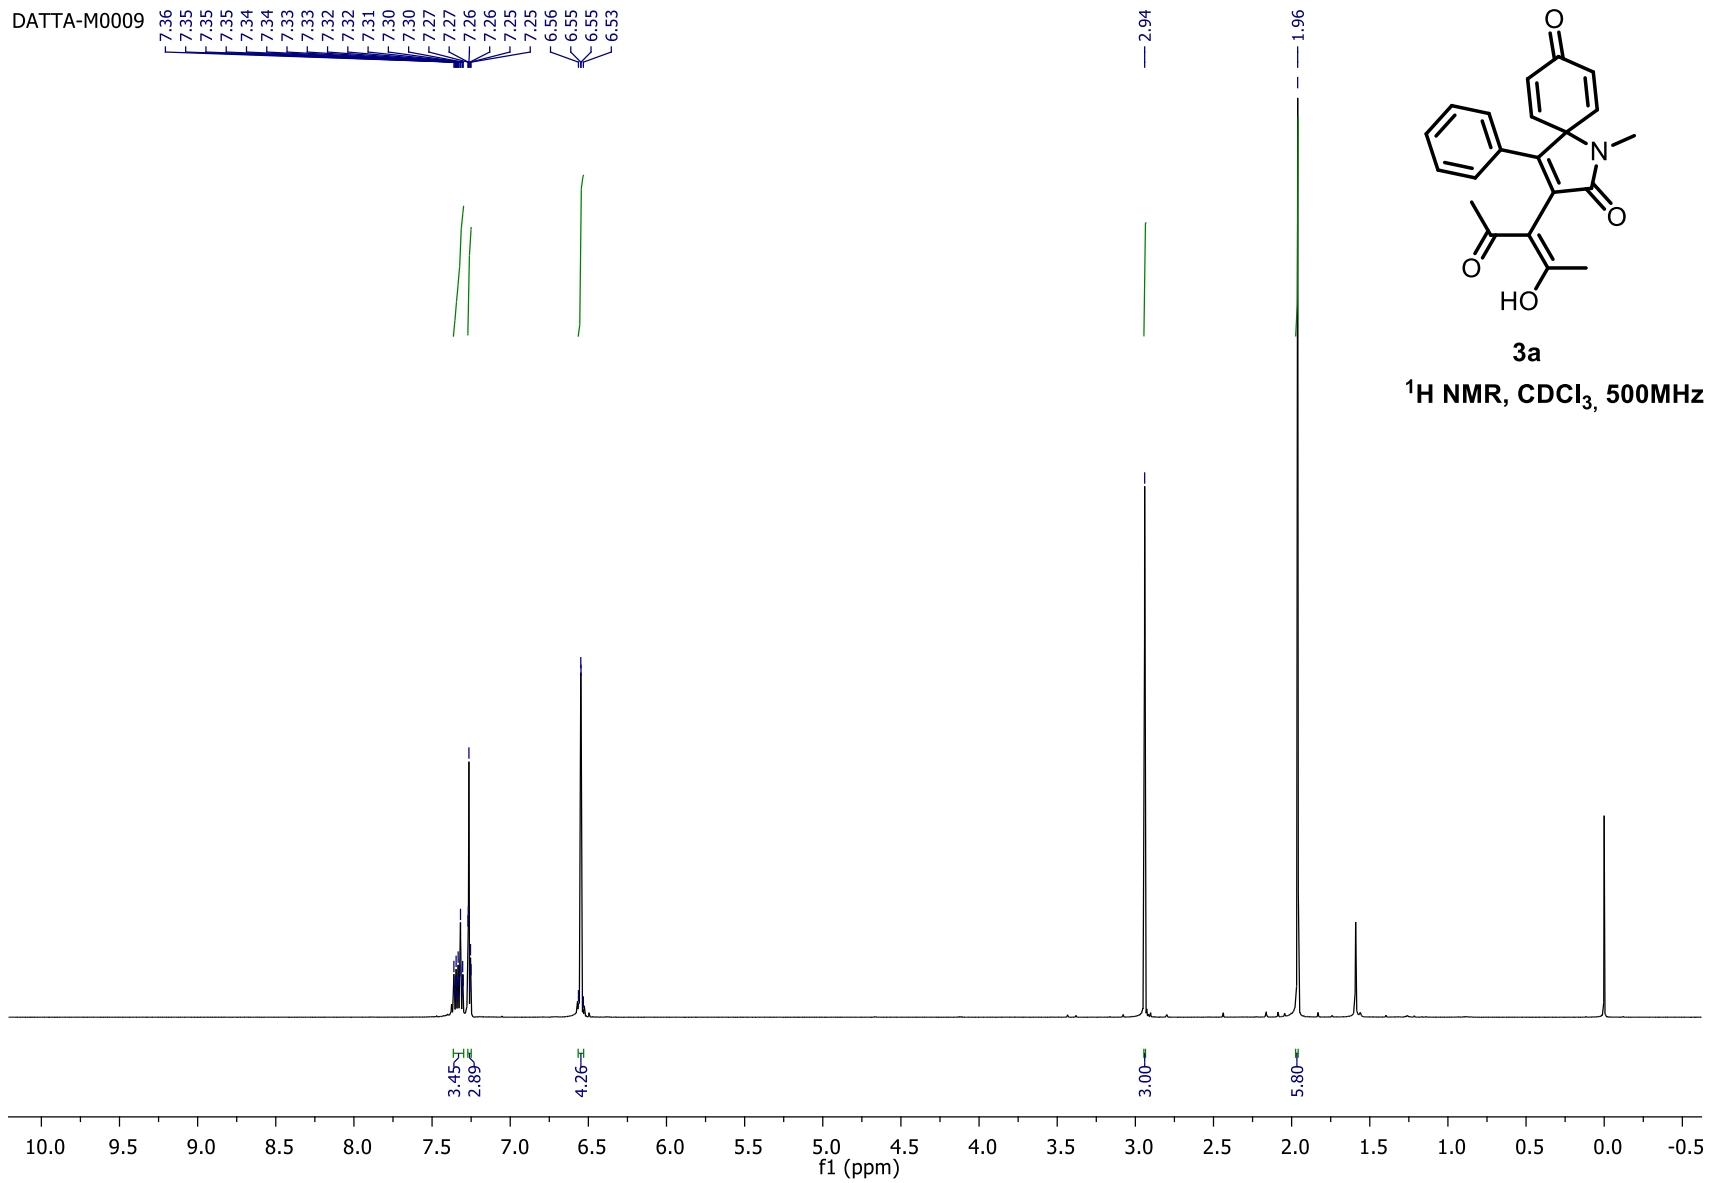



DATTA-M0009

— 191.48

— 183.86

— 169.62

— 152.75

— 145.24

— 133.35

— 133.25

— 131.47

— 130.14

— 129.11

— 127.24

— 104.17

— 67.01

— 26.08

— 23.88

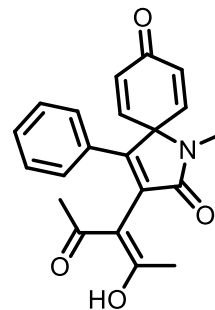

**3a**

**<sup>13</sup>C NMR, CDCl<sub>3</sub>, 101MHz**

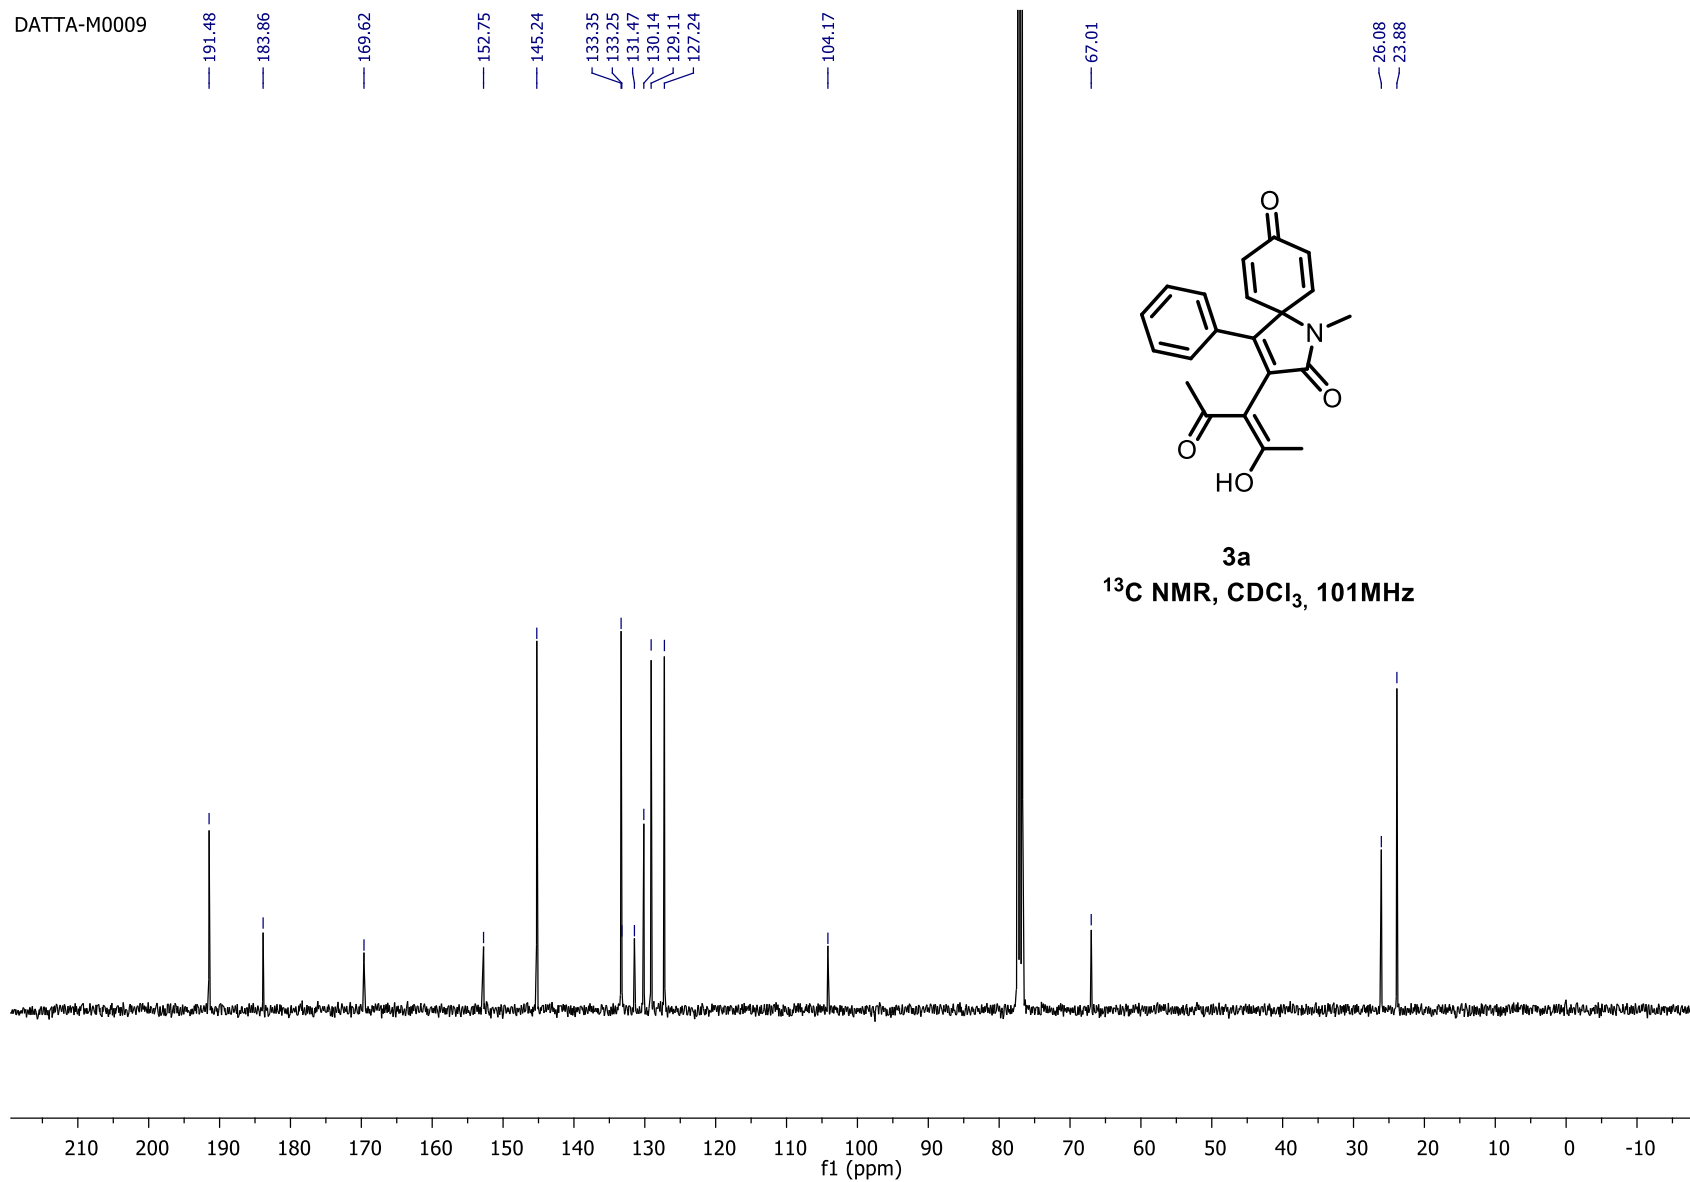

MOUNKA-M0009

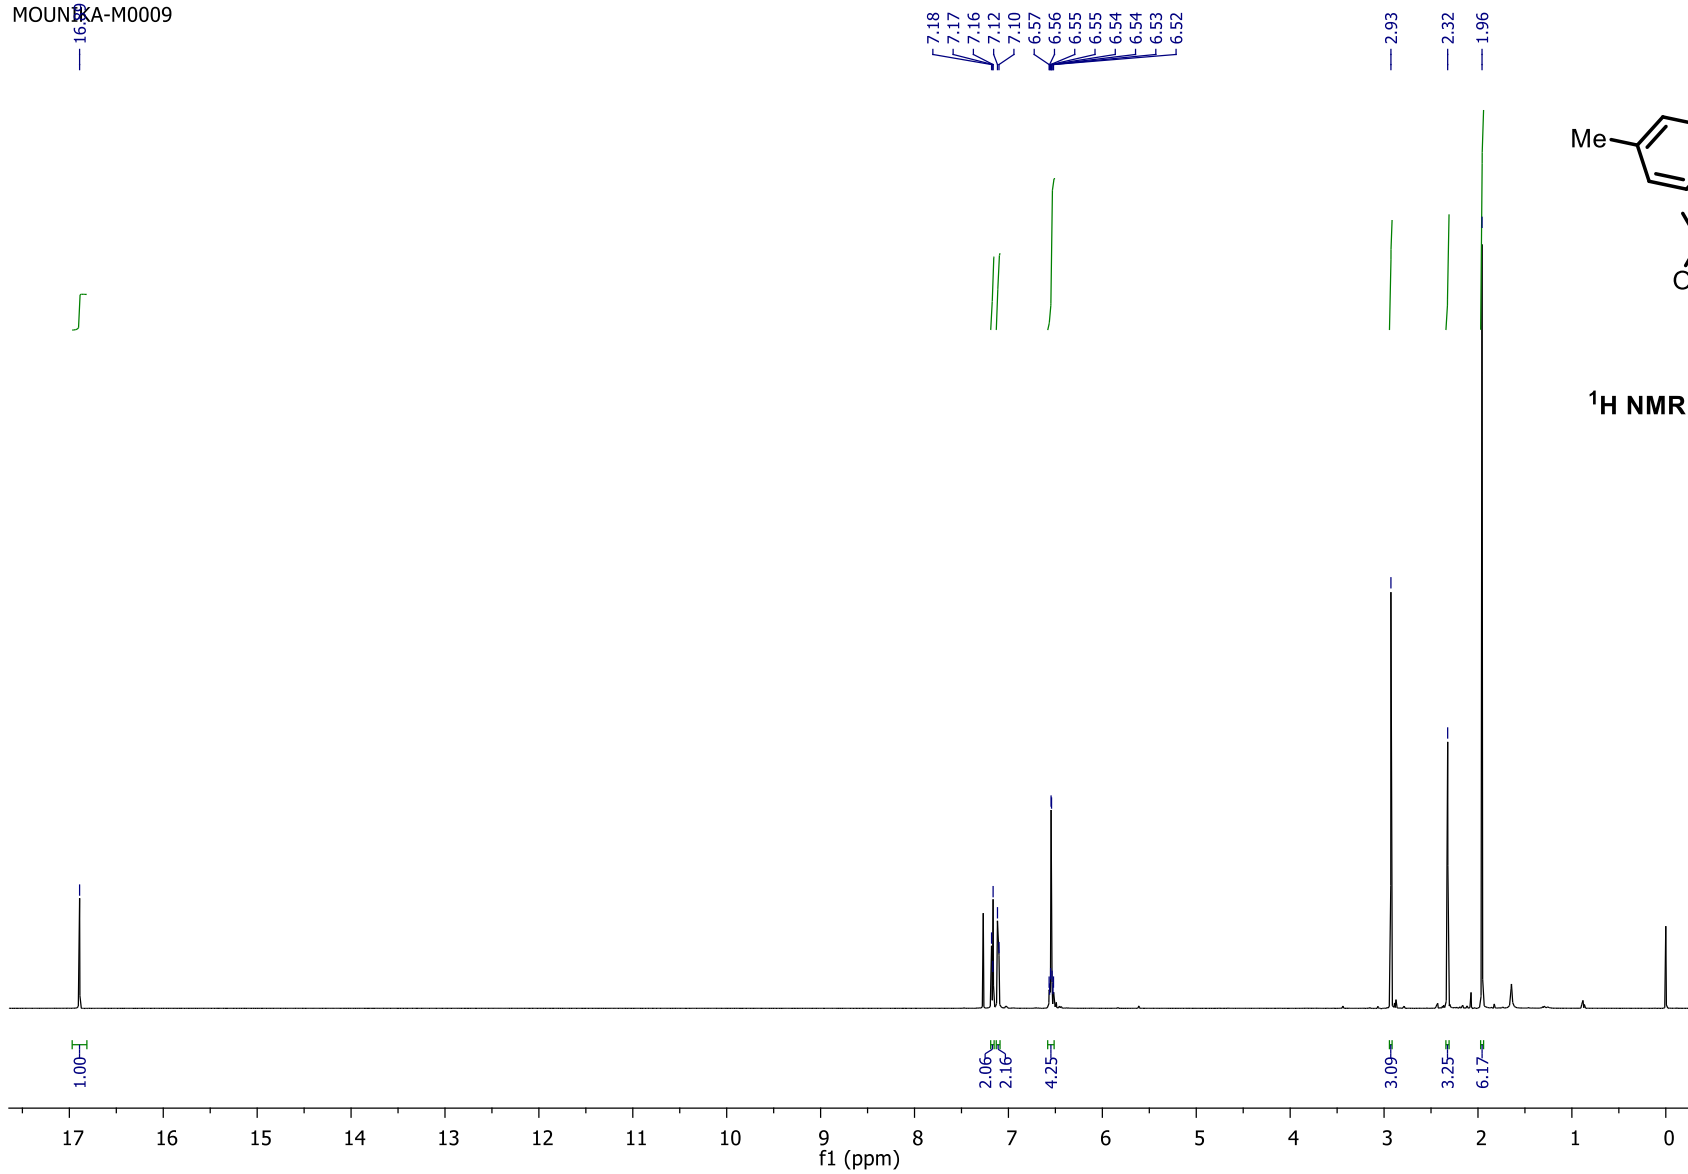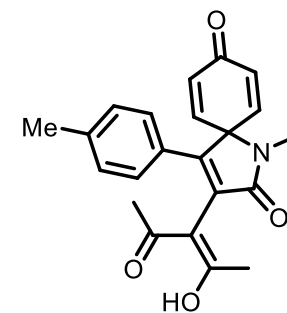

3b

<sup>1</sup>H NMR, CDCl<sub>3</sub>, 500MHz

DATTA-M0009

— 191.52

— 183.99

— 169.78

— 152.77

— 145.50

— 140.54

— 133.23

— 132.48

— 129.82

— 128.53

— 127.11

— 104.35

— 66.94

— 26.02

— 23.88

— 21.35

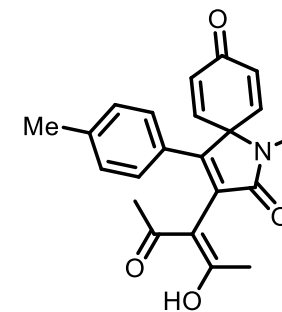

**3b**

**<sup>13</sup>C NMR, CDCl<sub>3</sub>, 101MHz**

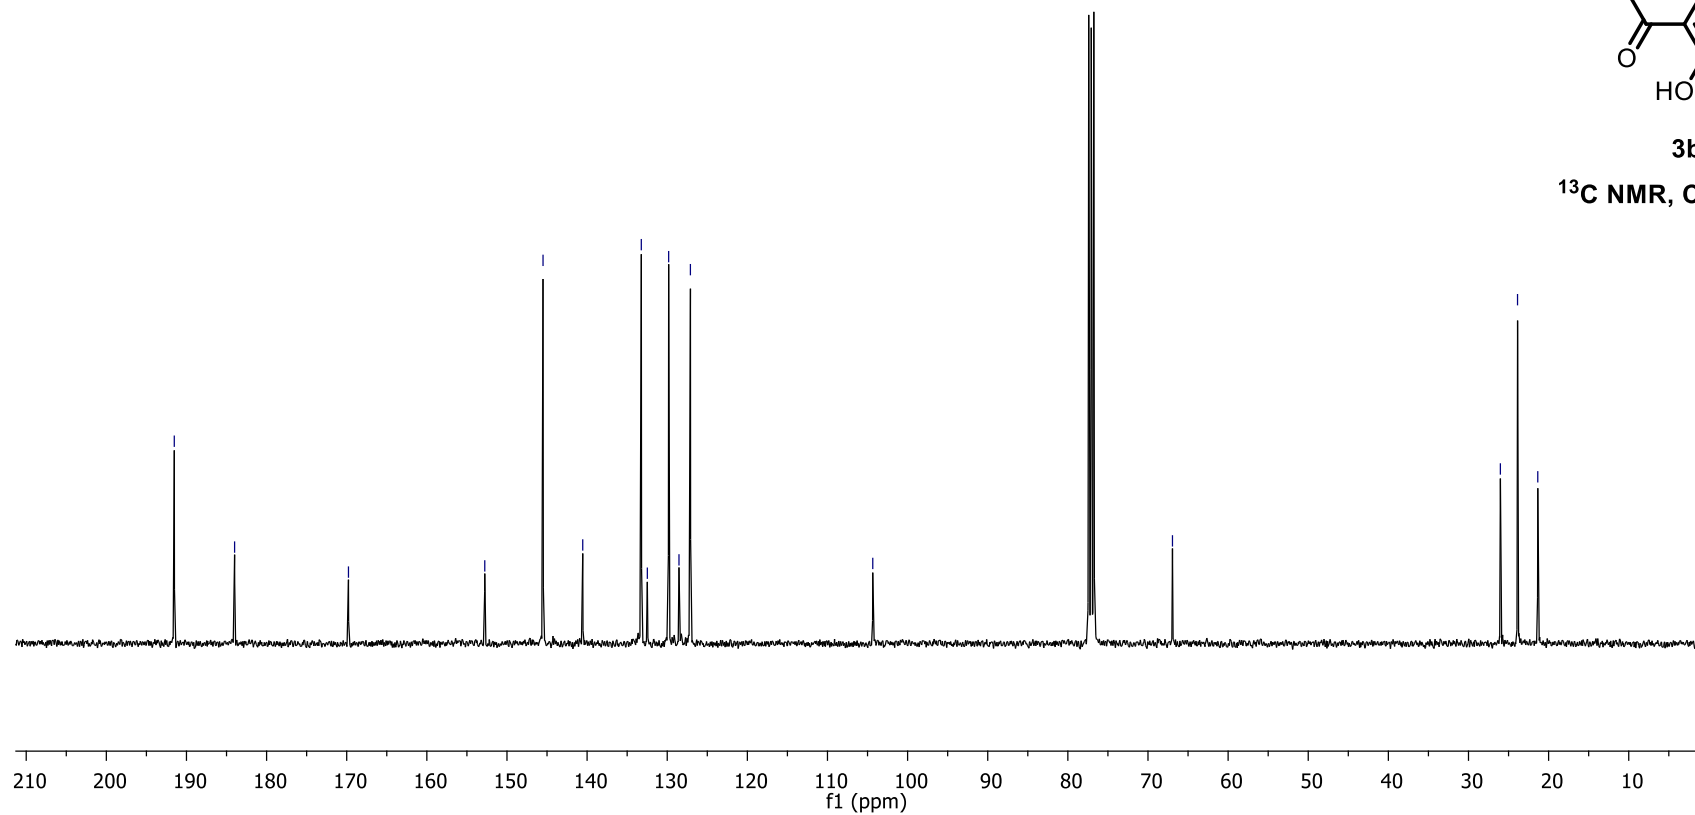

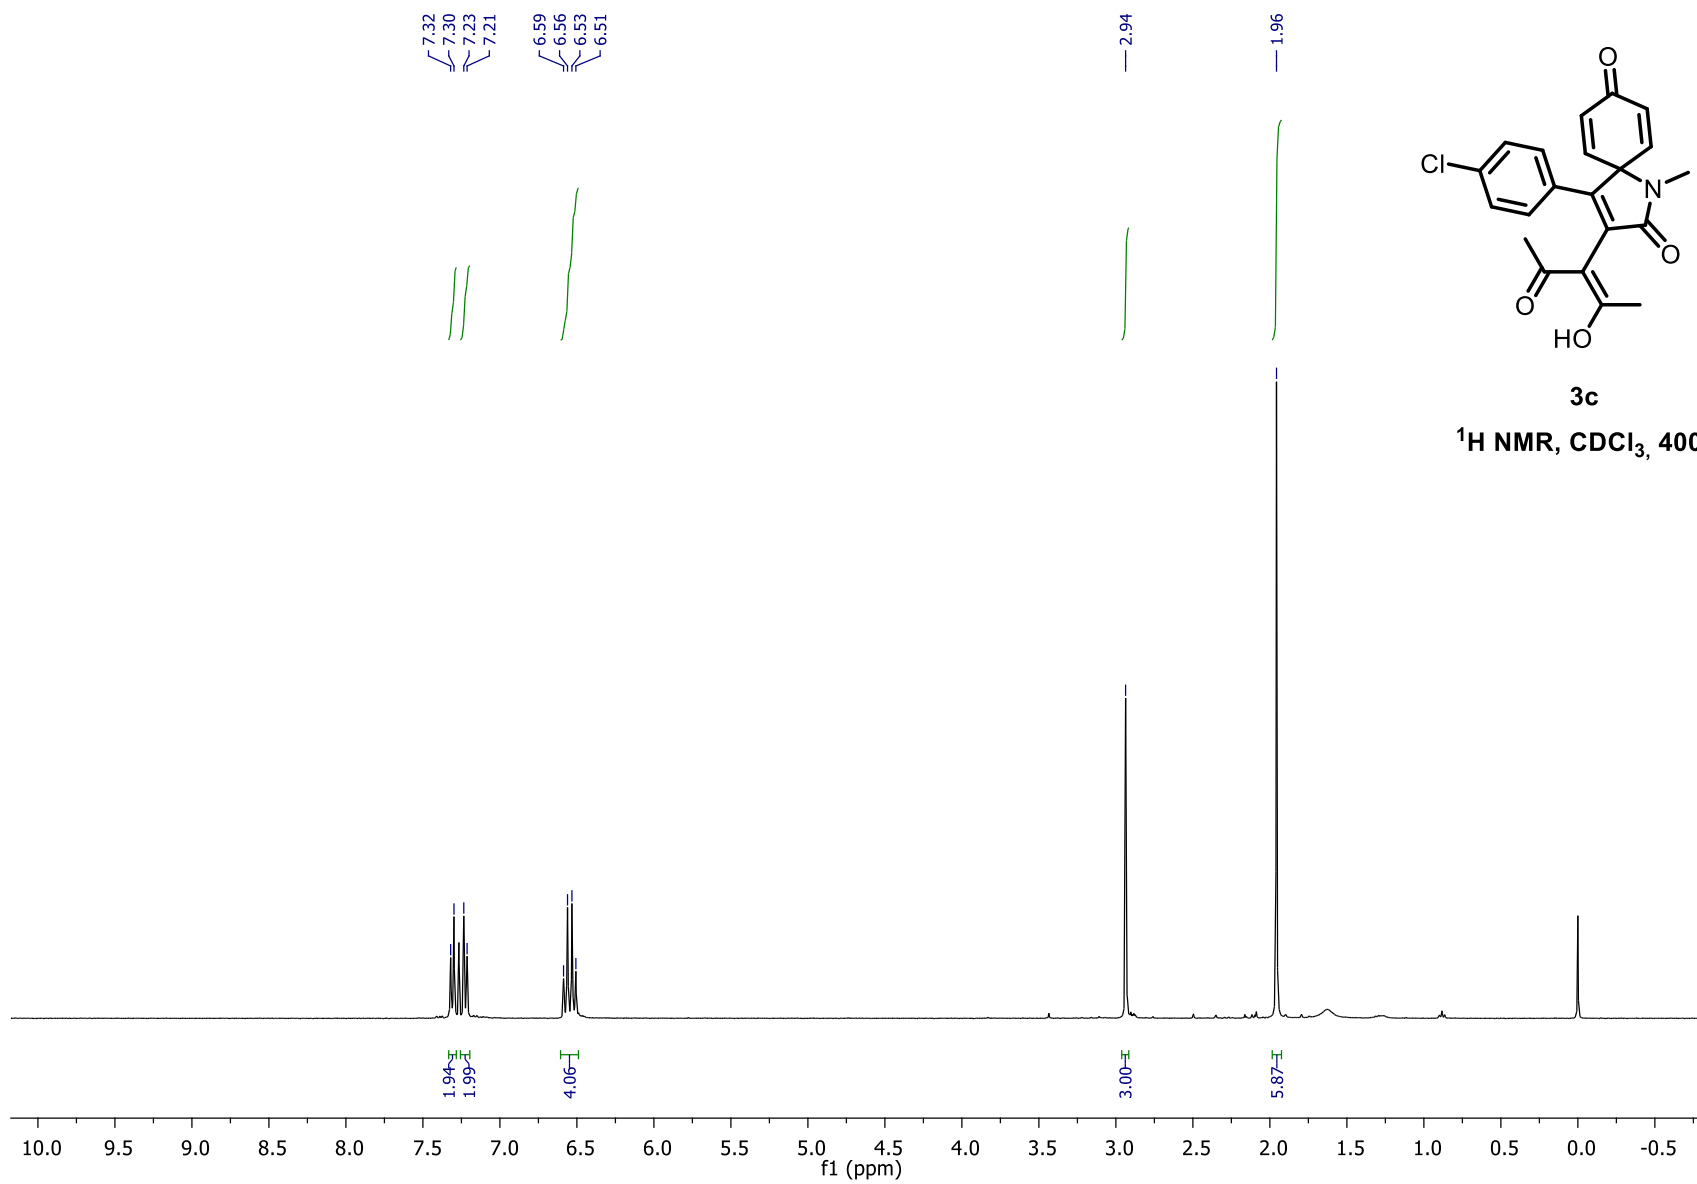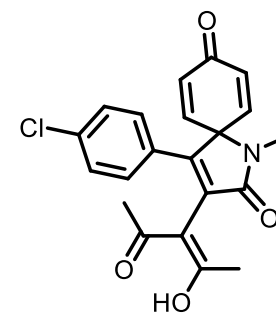

**3c**  
**<sup>1</sup>H NMR, CDCl<sub>3</sub>, 400MHz**

DATTHARI-M0009

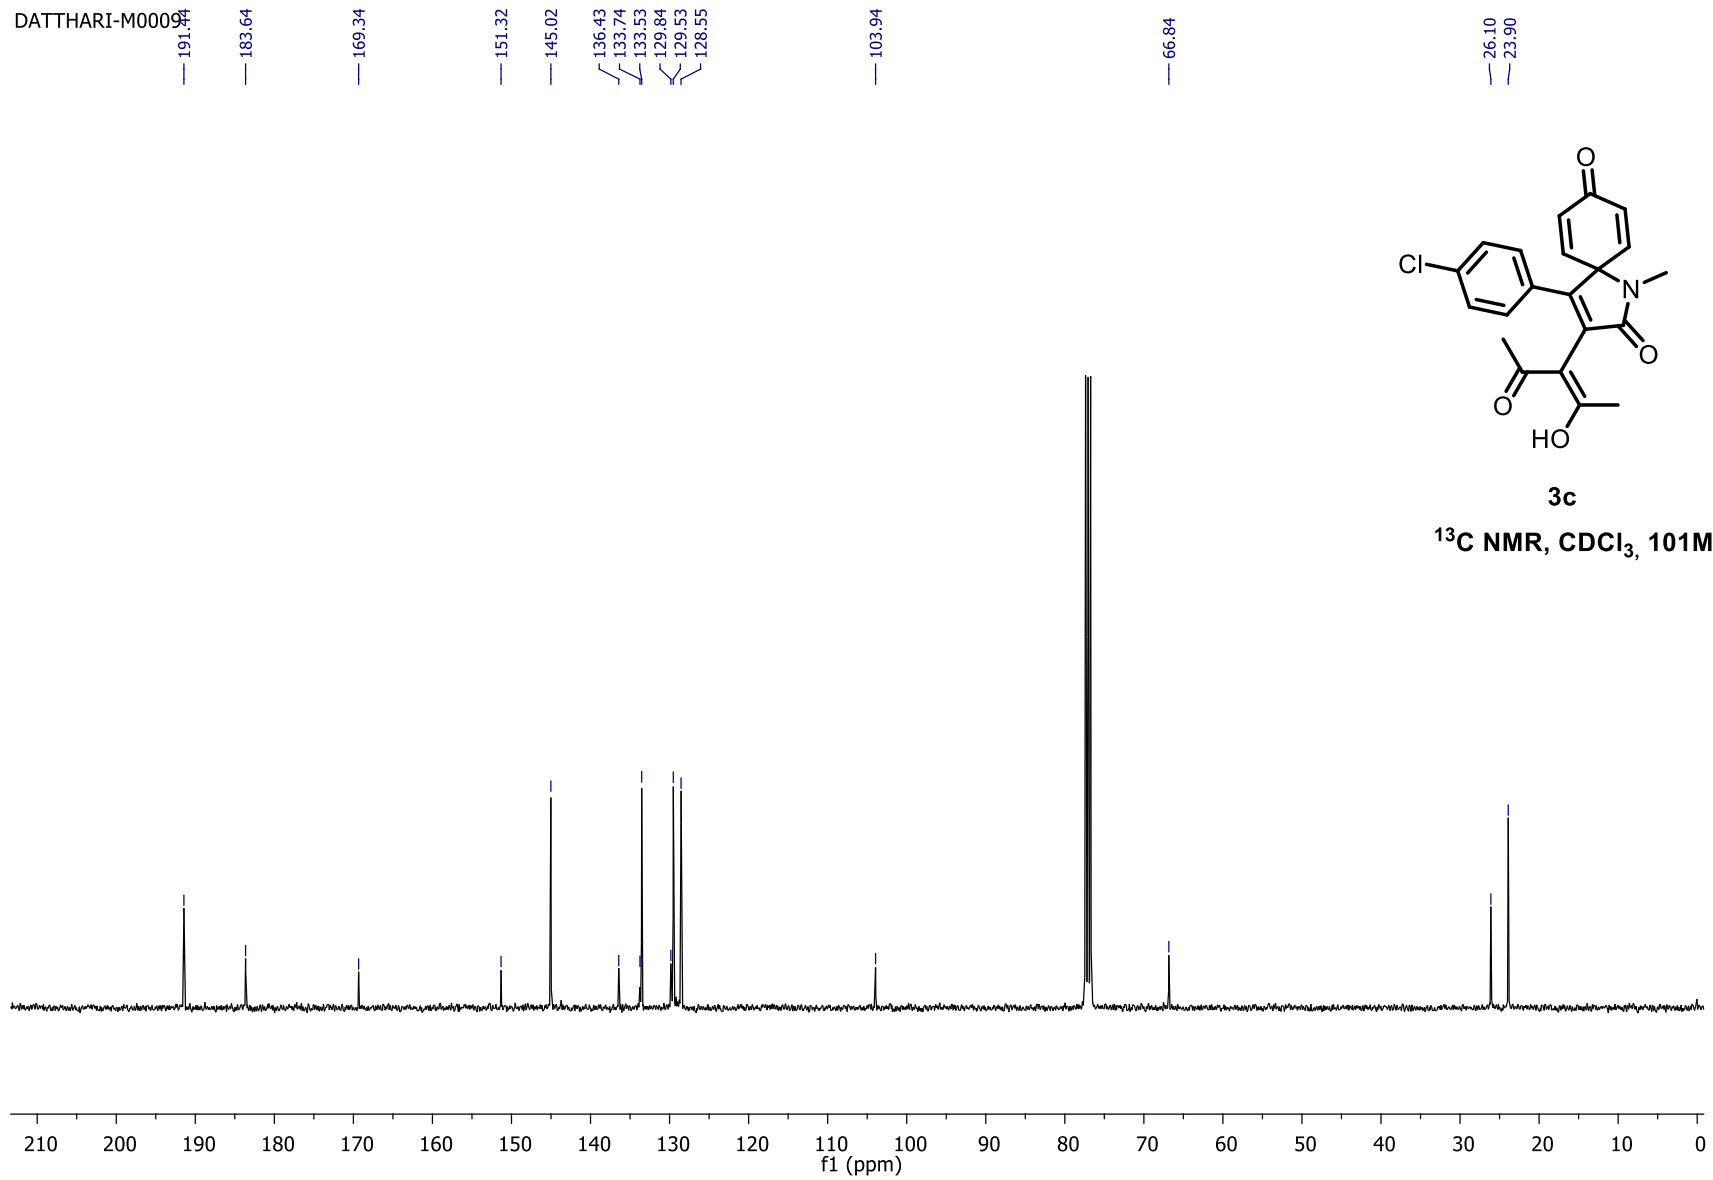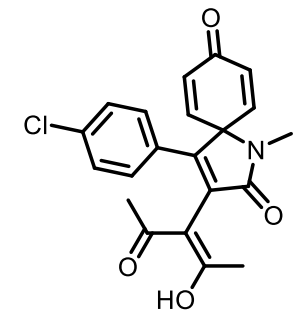

3c

<sup>13</sup>C NMR, CDCl<sub>3</sub>, 101MHz

MOUNIKA-M0009

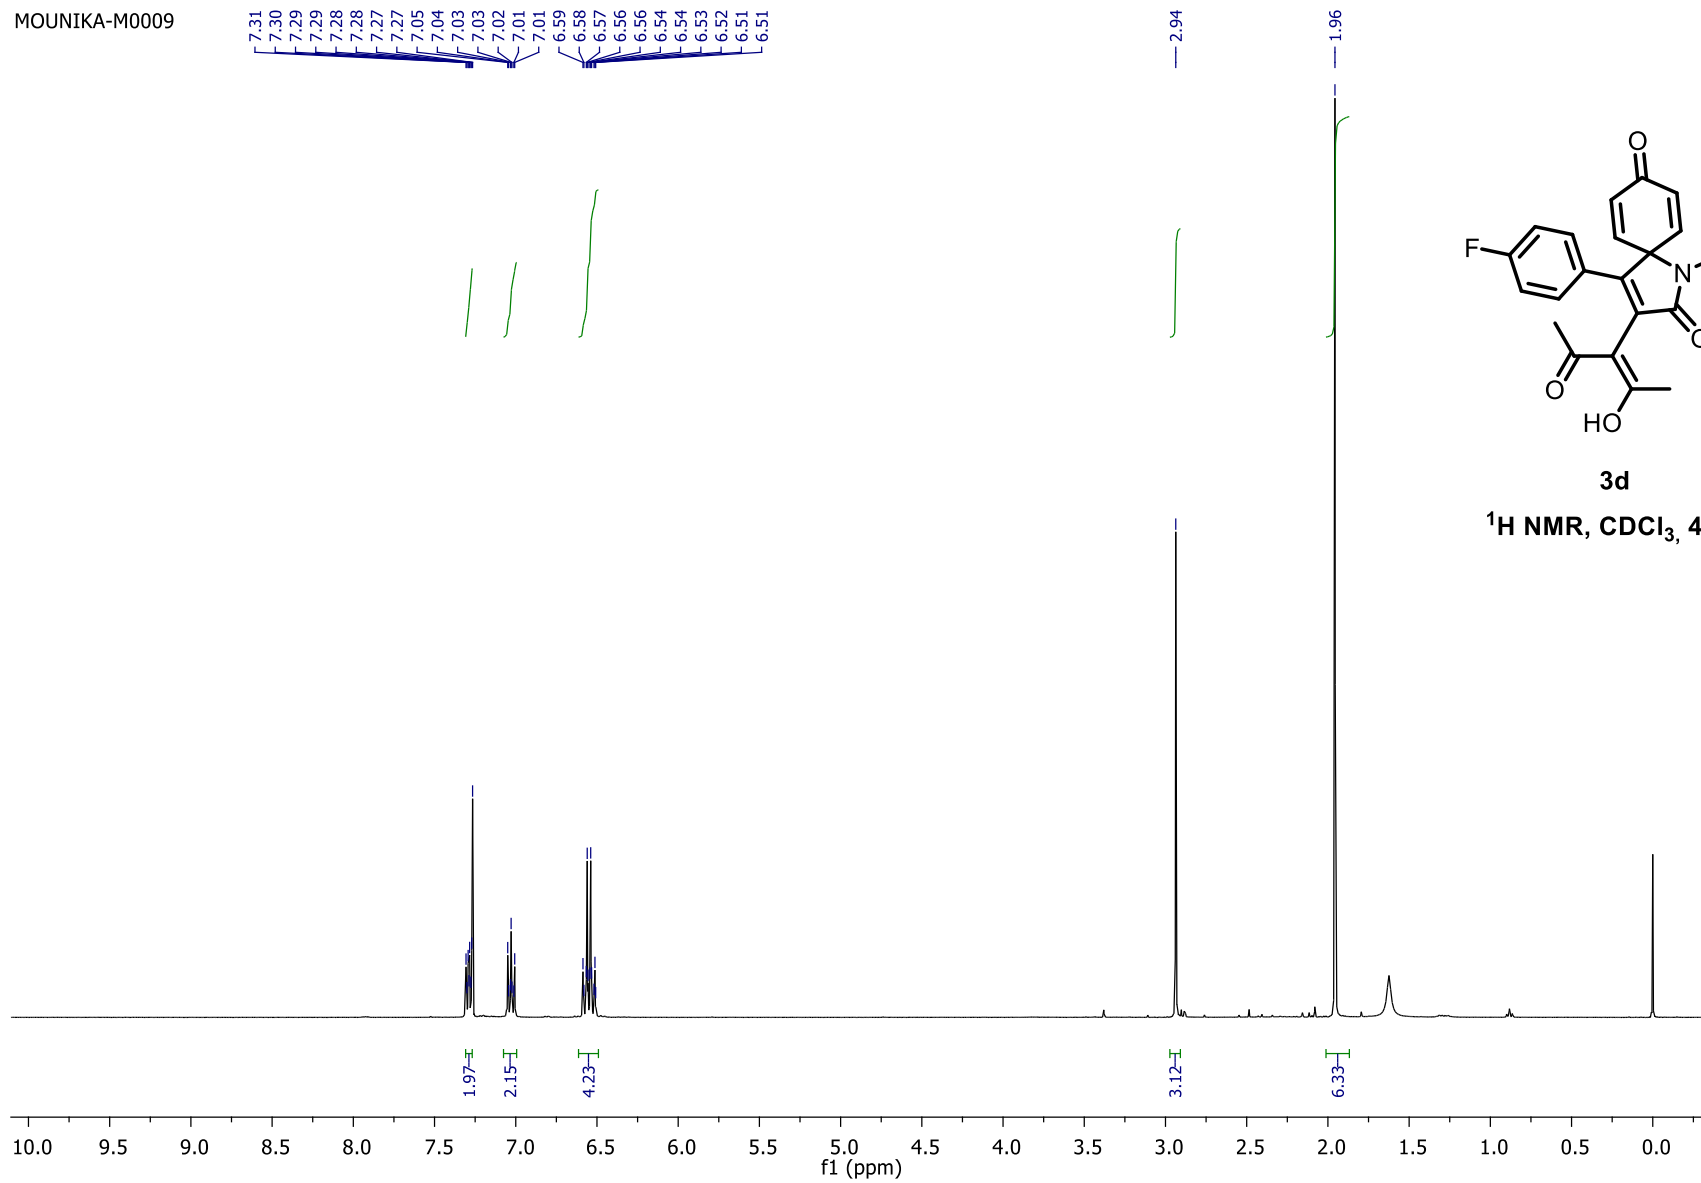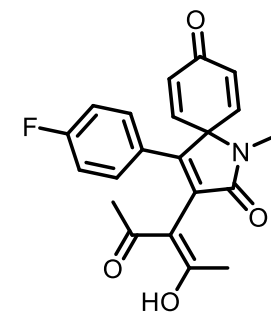

3d

<sup>1</sup>H NMR, CDCl<sub>3</sub>, 400MHz

RATHANS-M00099

— 191.49

— 183.71

— 169.47

— 164.64

— 162.13

— 151.50

— 145.16

— 133.48

— 133.35

— 129.39

— 129.30

— 127.53

— 127.49

— 116.60

— 116.38

— 104.00

— 66.92

— 26.10

— 23.88

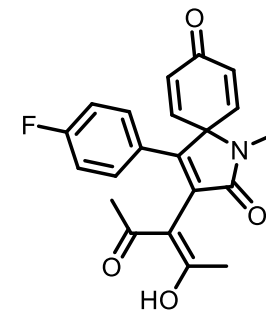

3d

<sup>13</sup>C NMR, CDCl<sub>3</sub>, 101MHz

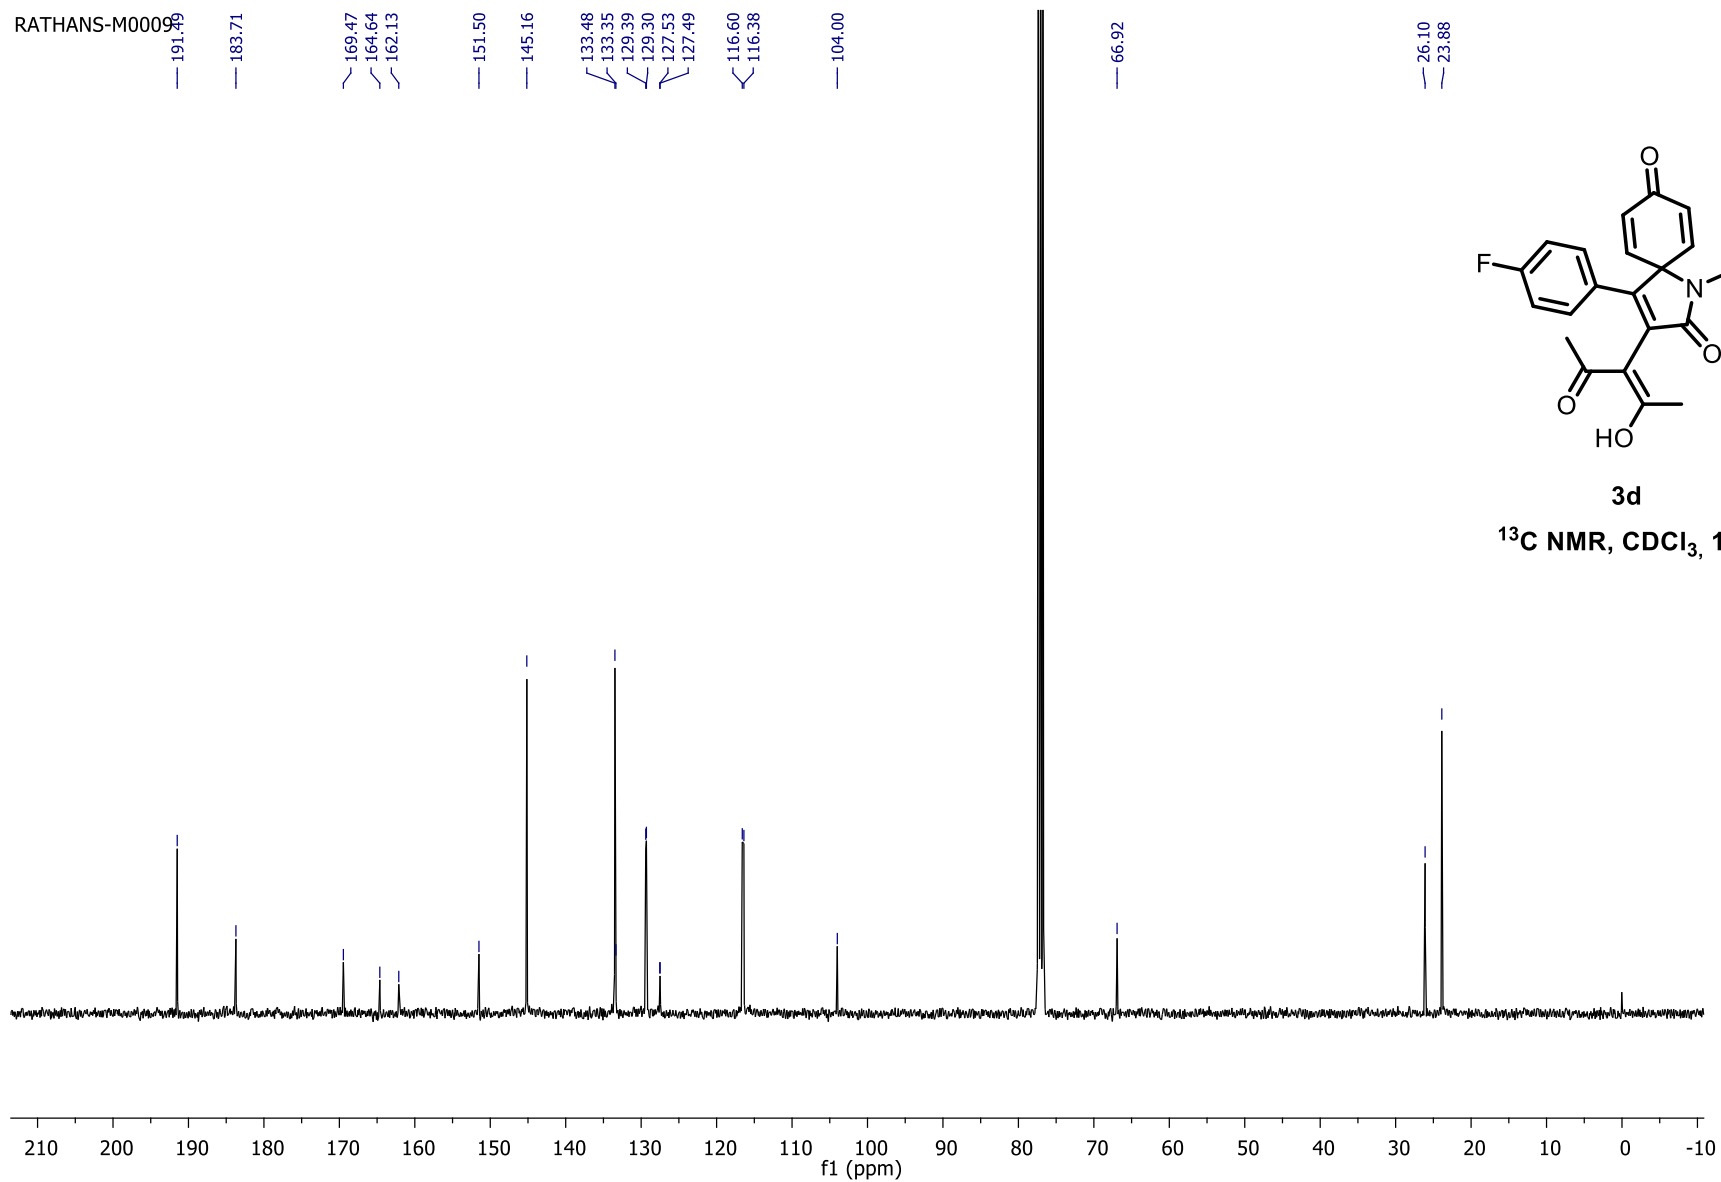

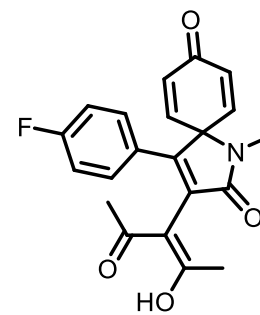

3d

<sup>19</sup>F NMR, CDCl<sub>3</sub>, 377MHz

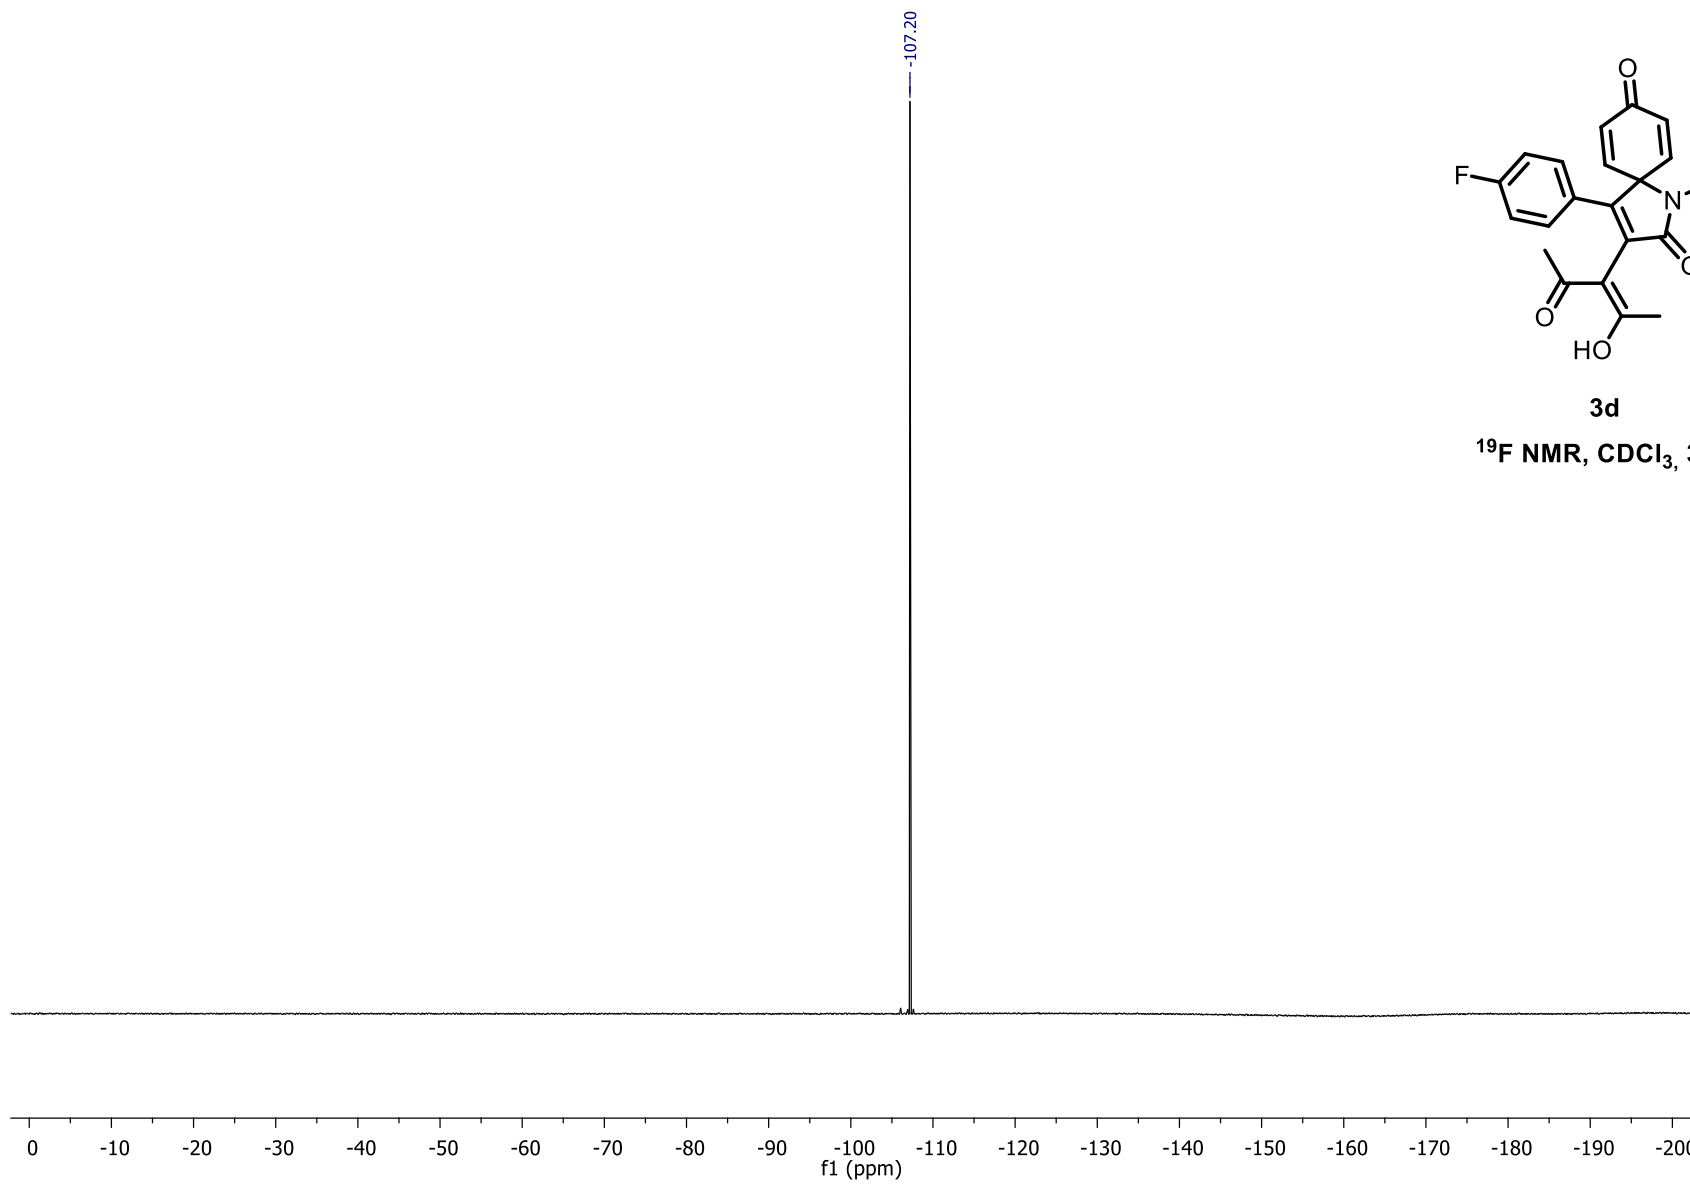



MOUNIKA-M0009

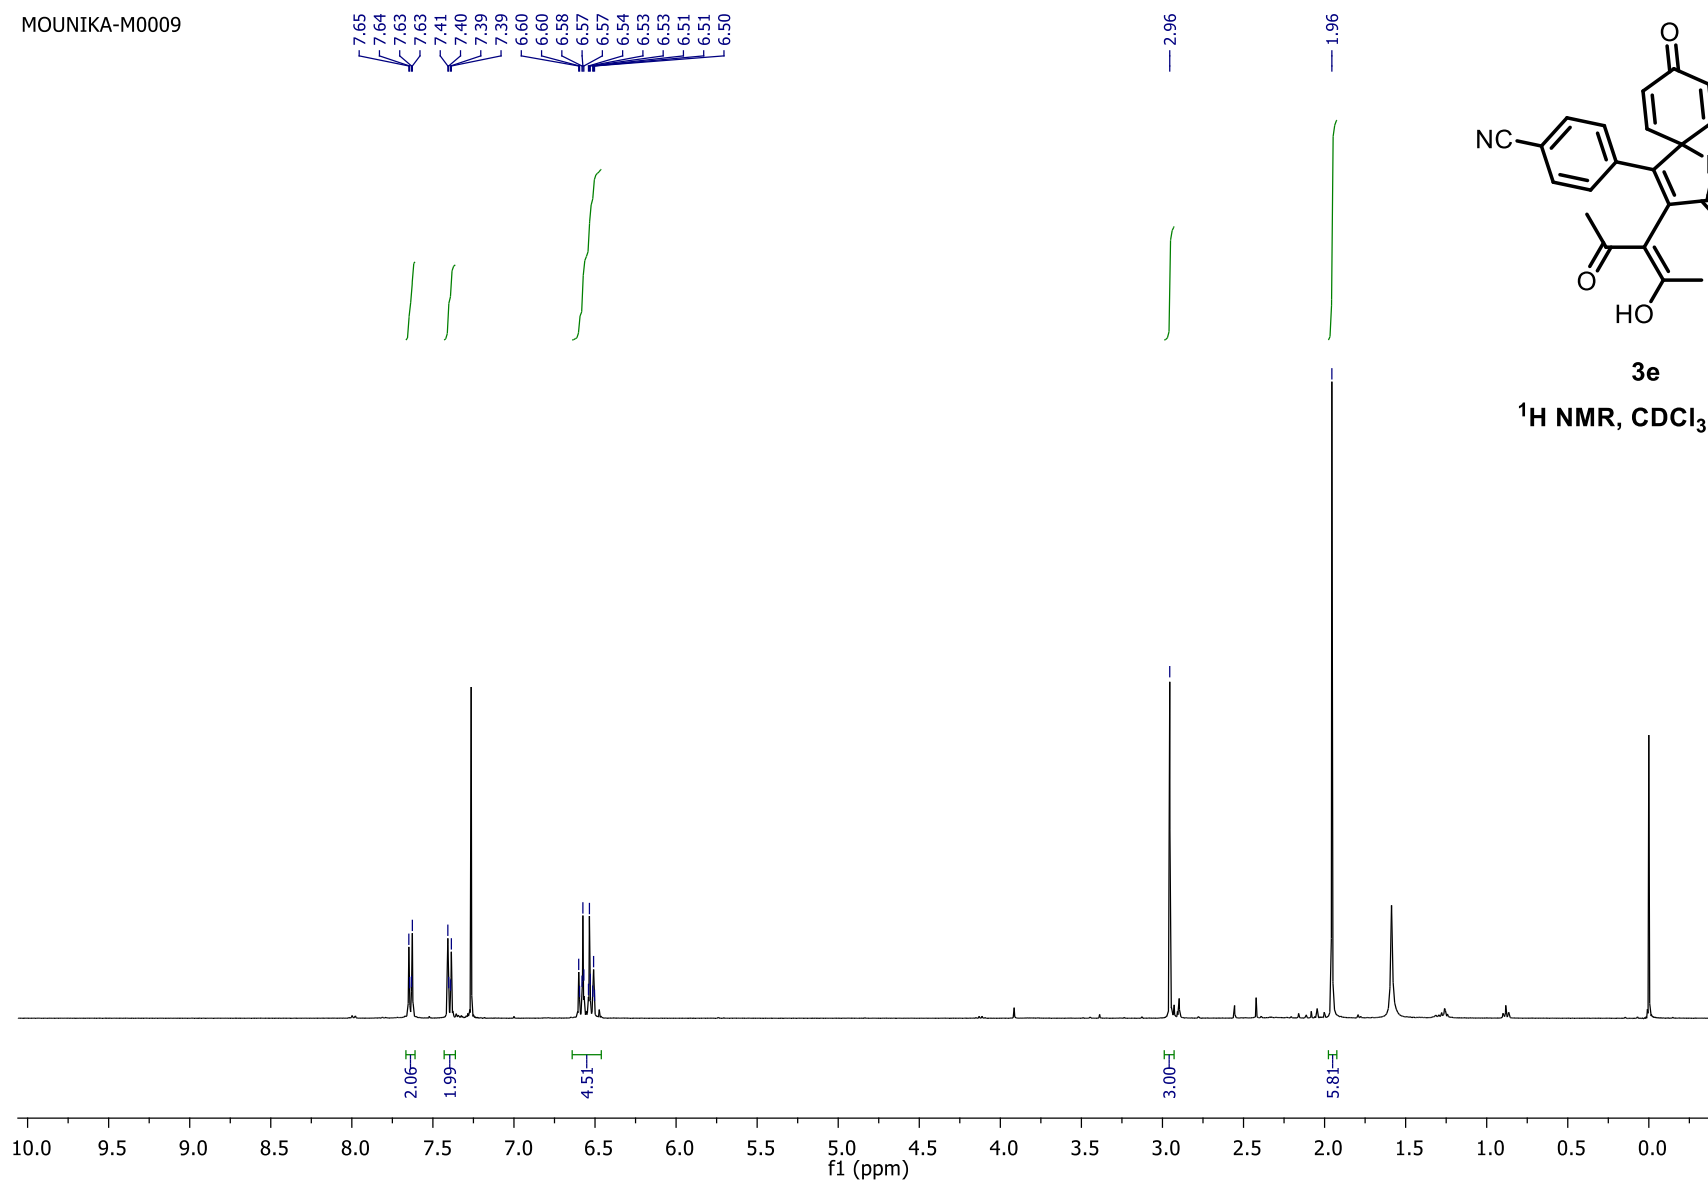

**3e**  
**<sup>1</sup>H NMR, CDCl<sub>3</sub>, 400MHz**

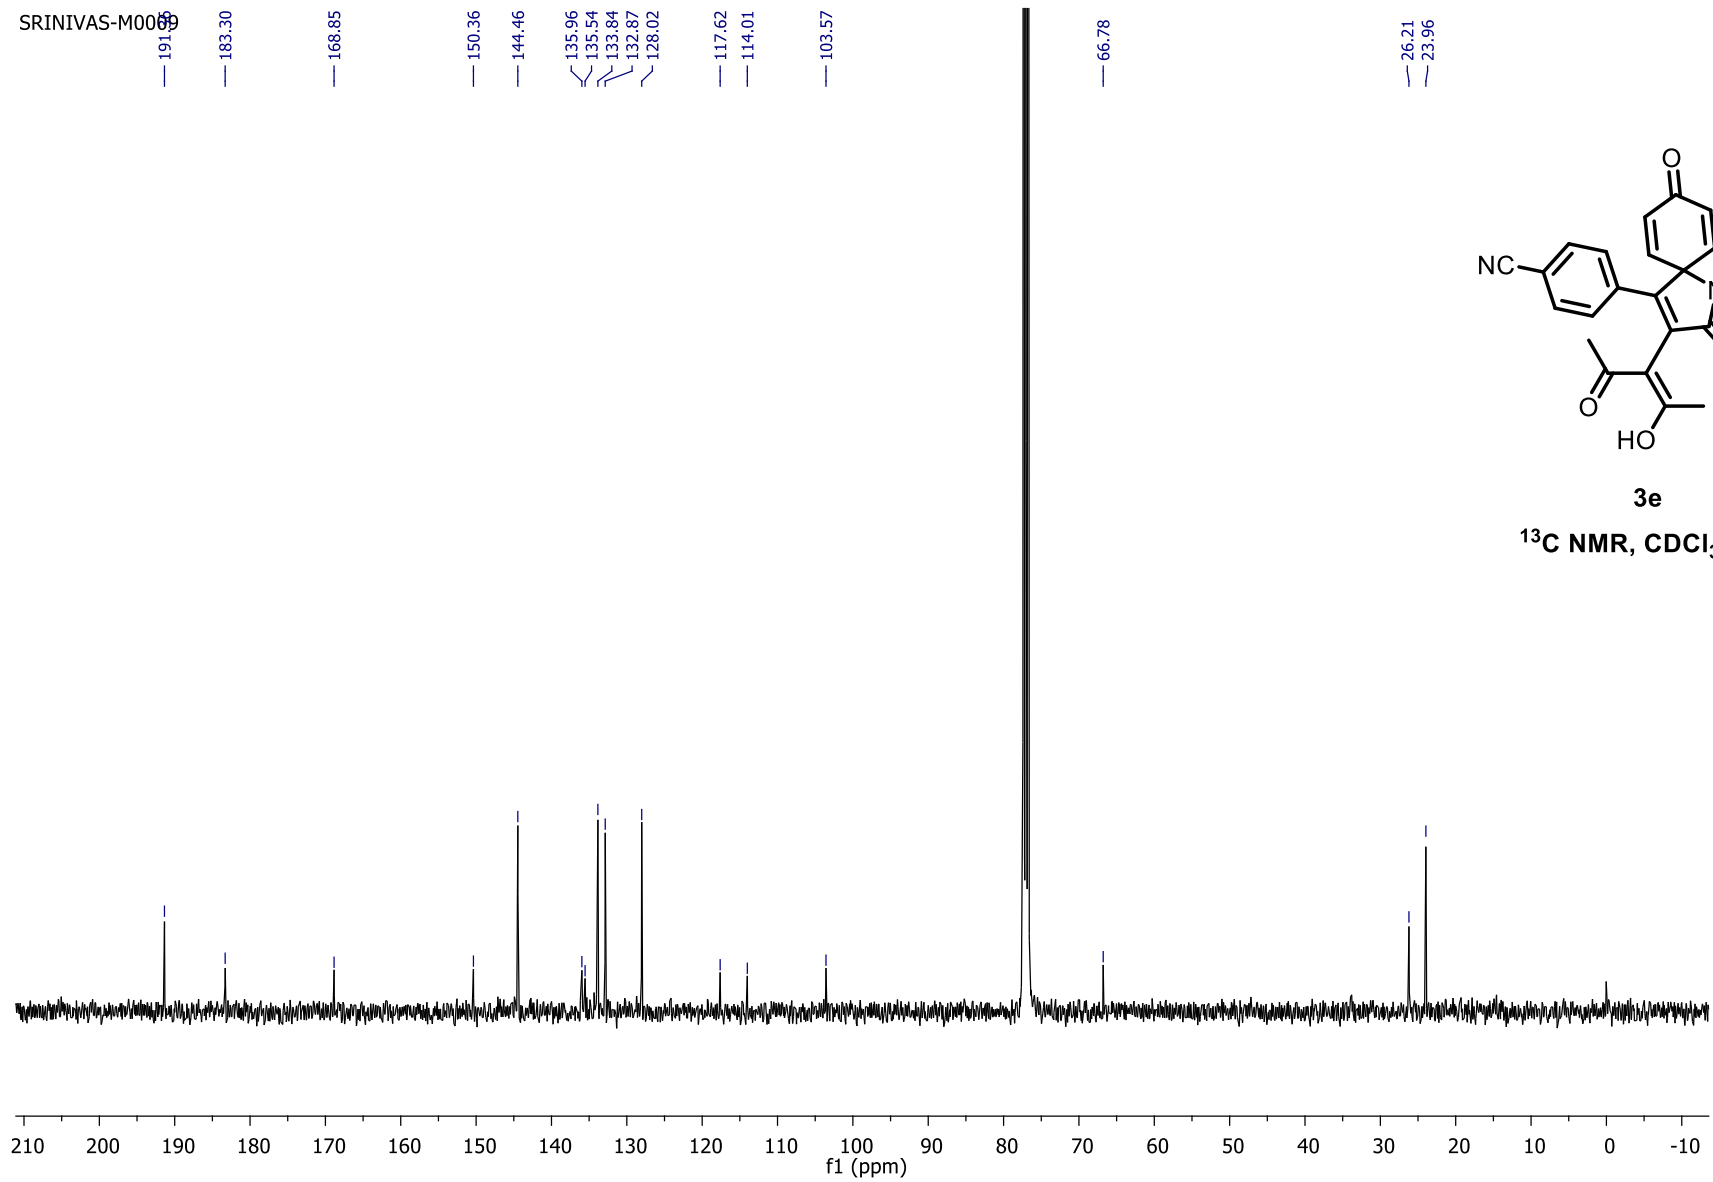

DATTAHARI-M0009

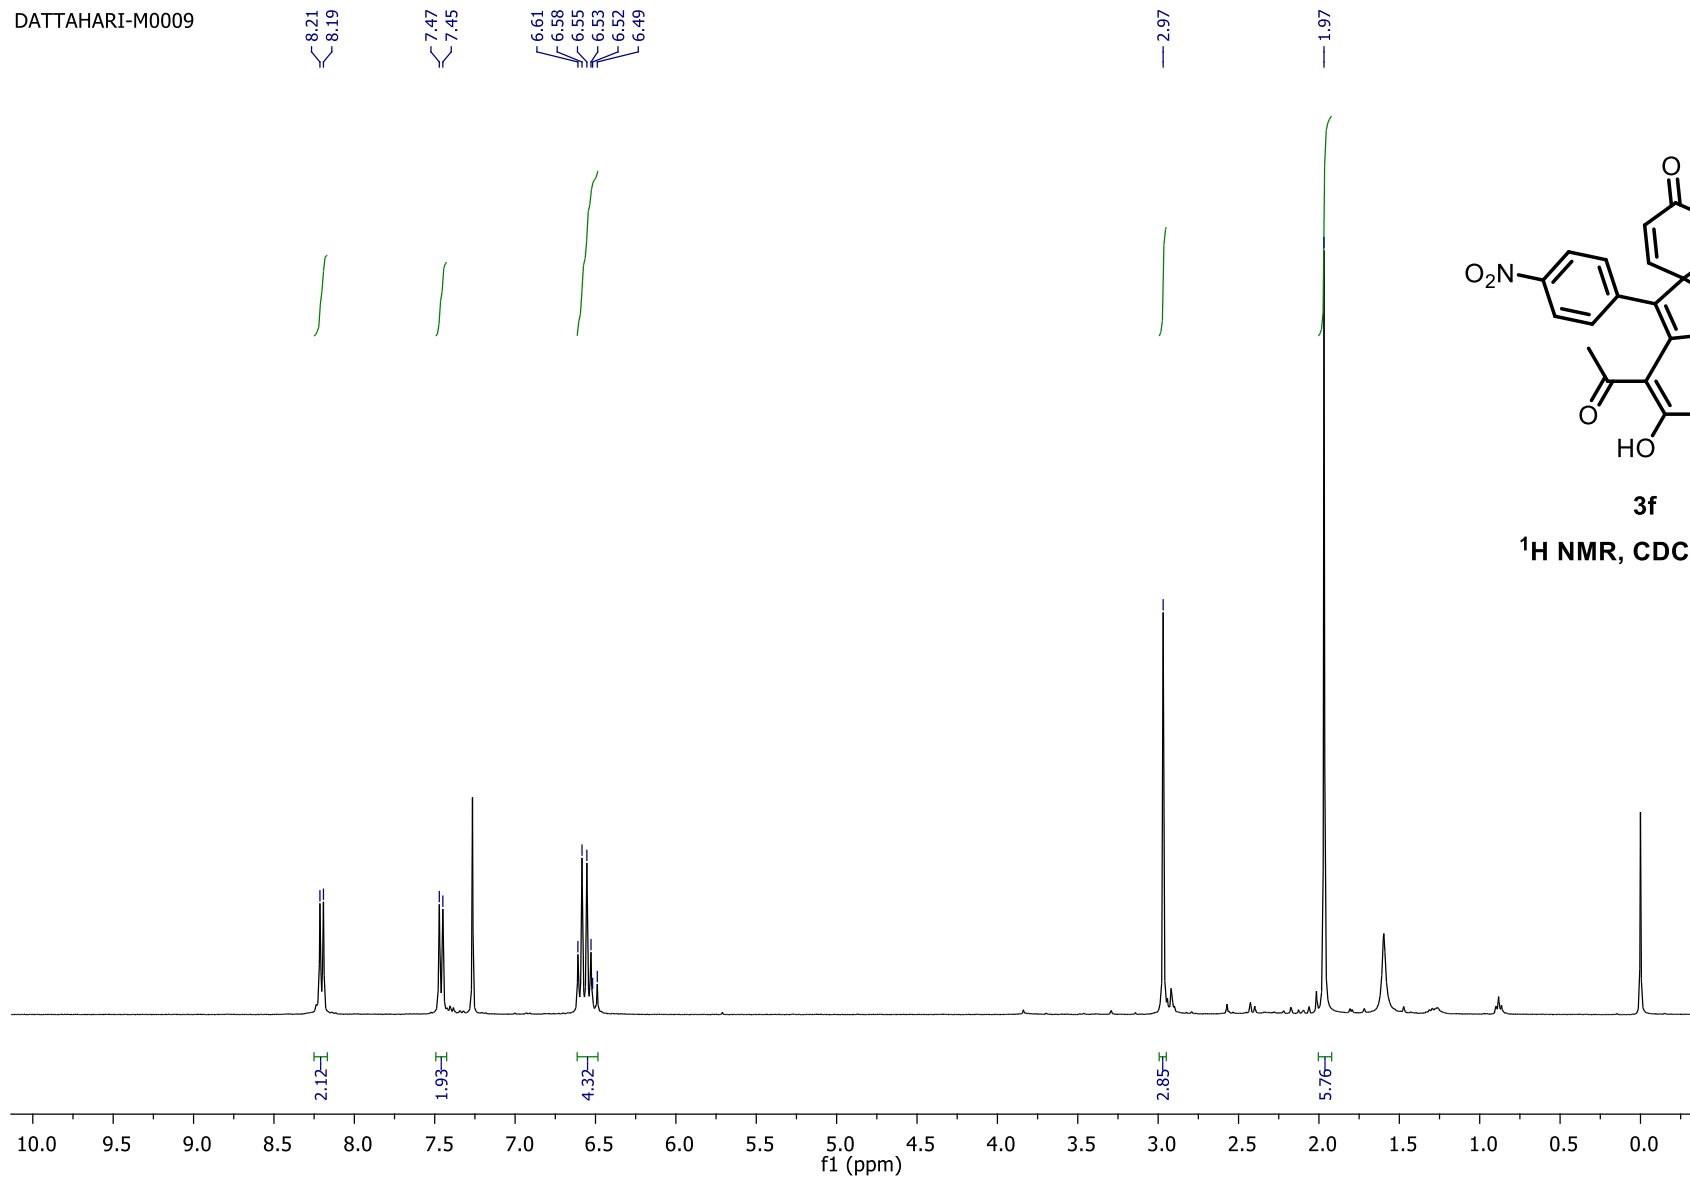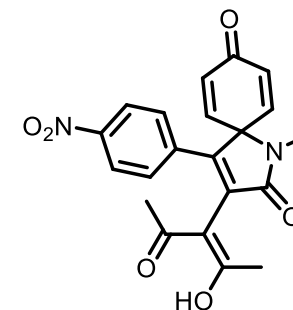

3f

<sup>1</sup>H NMR, CDCl<sub>3</sub>, 400MHz

KARNA-M0609

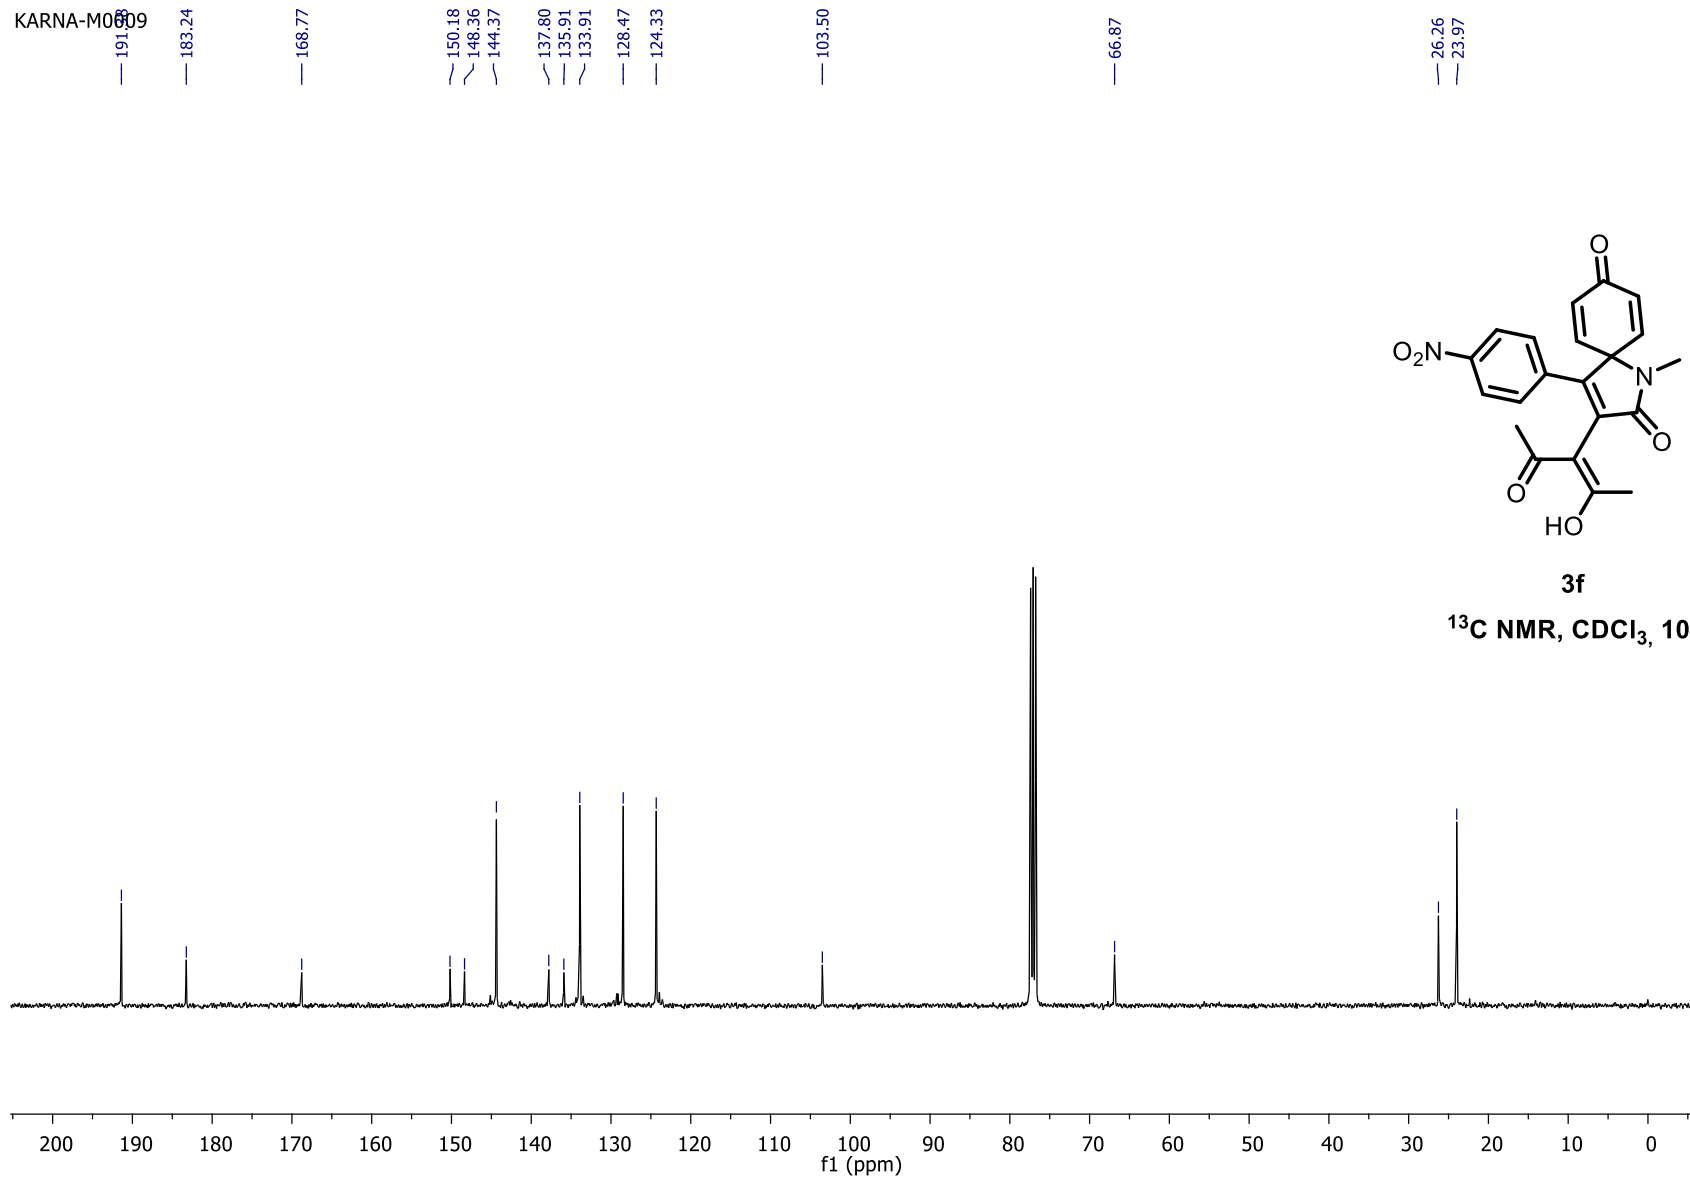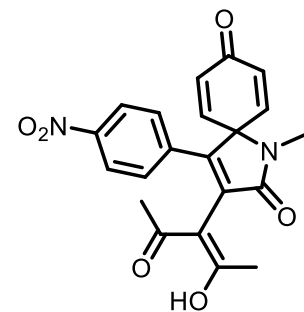

3f

<sup>13</sup>C NMR, CDCl<sub>3</sub>, 101MHz

DATTA M0009

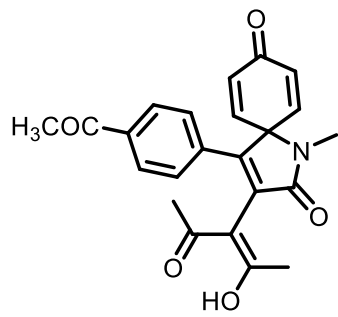

3g

<sup>1</sup>H NMR, CDCl<sub>3</sub>, 300MHz

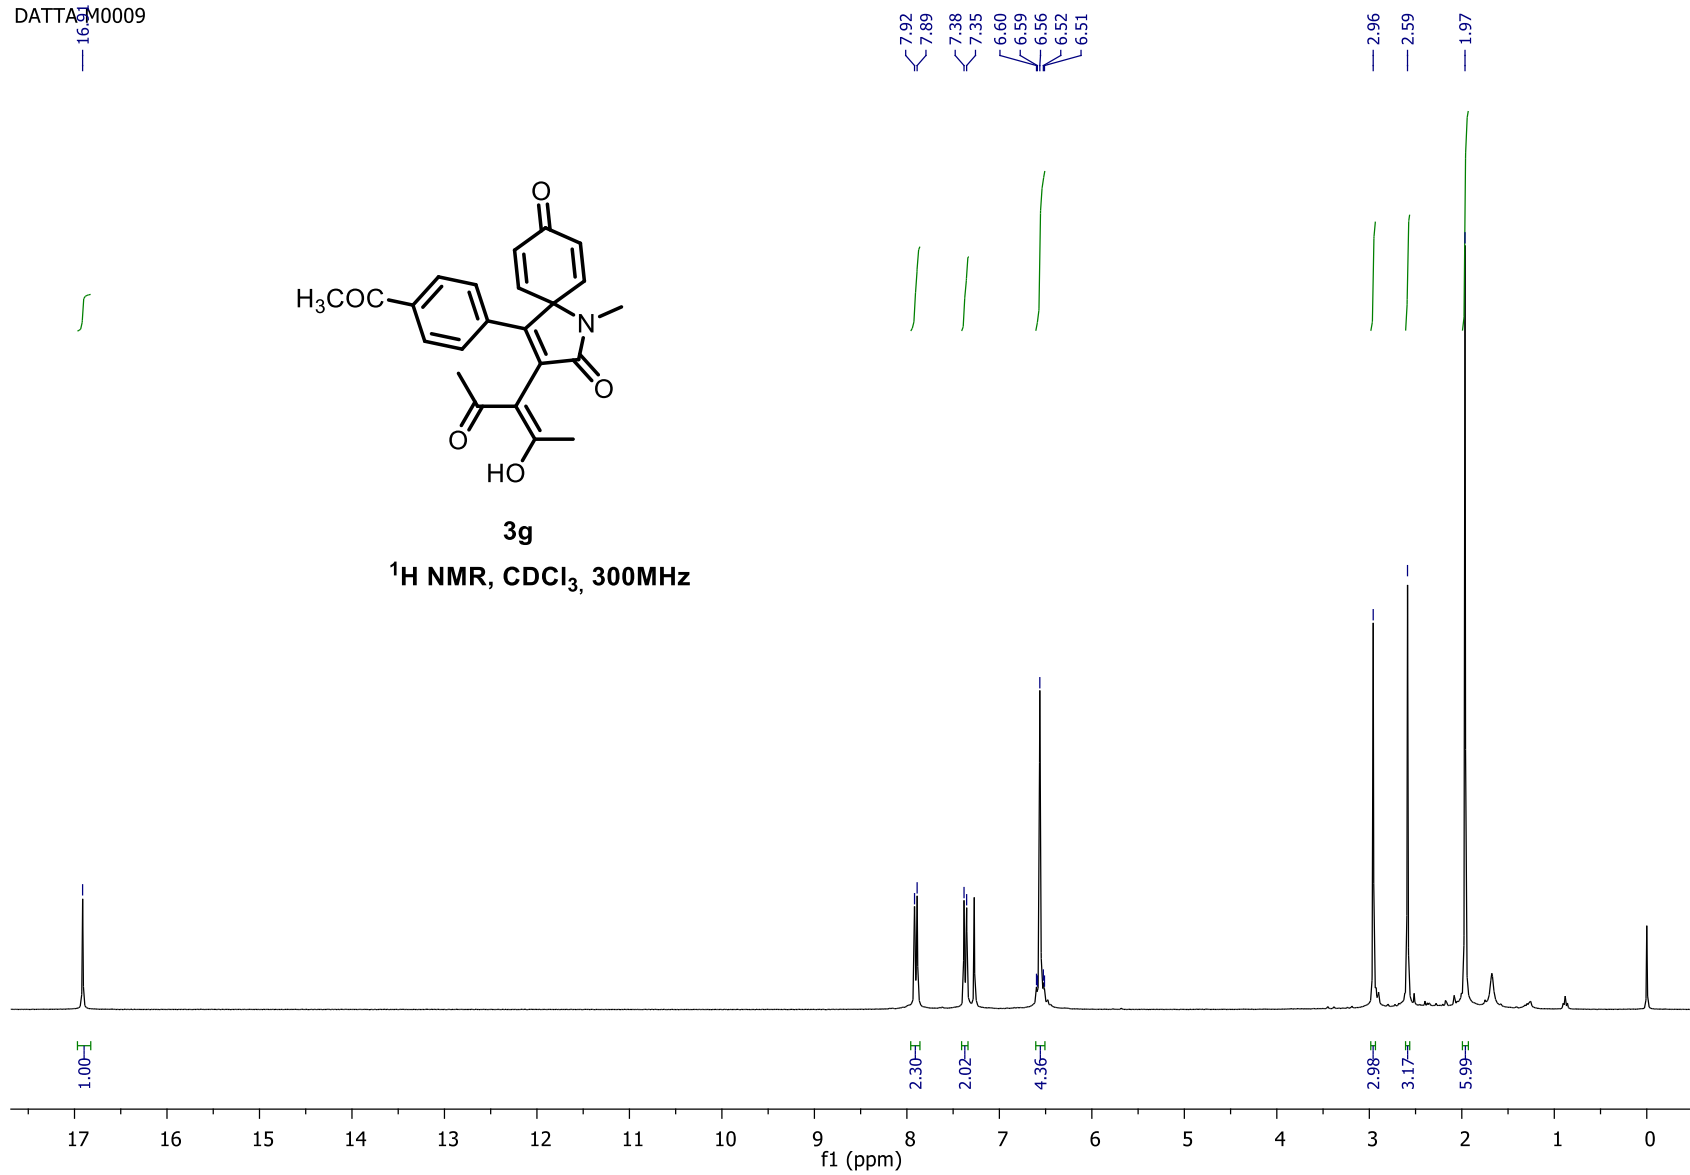

SRINIVASA MOORE

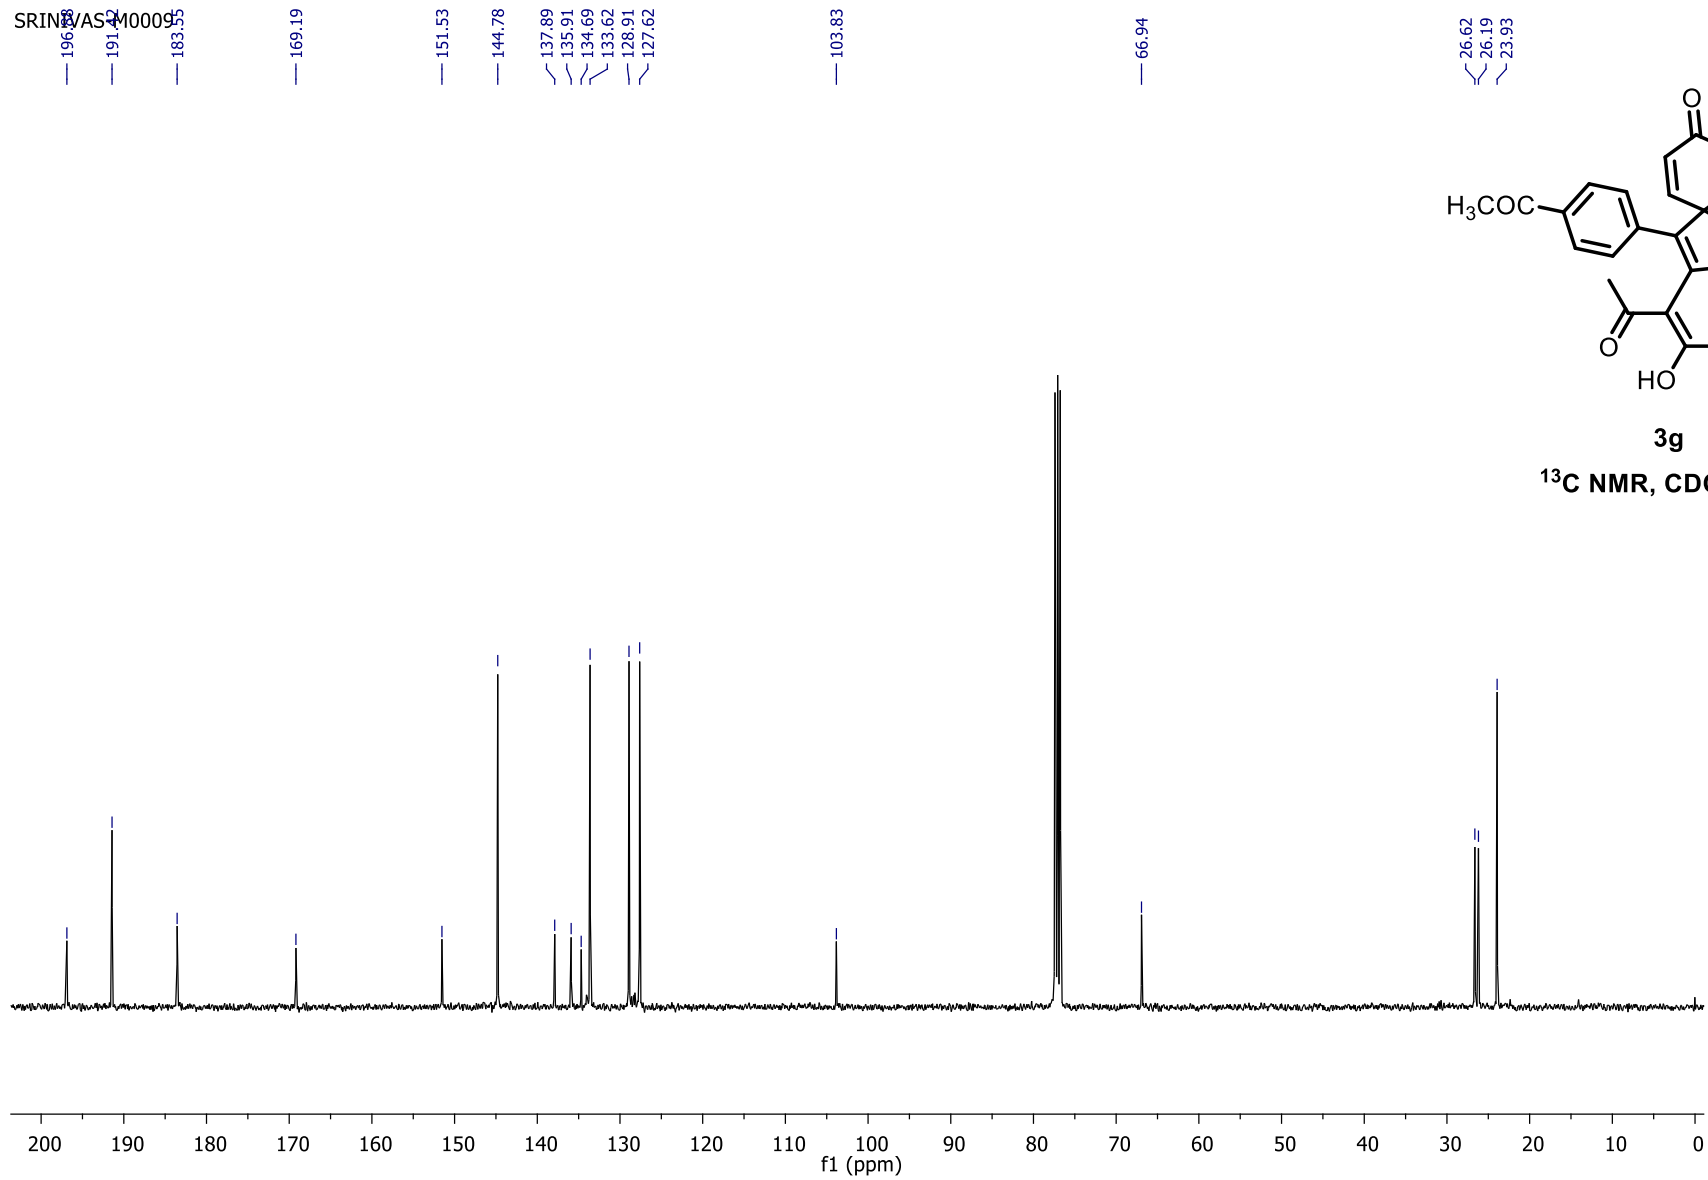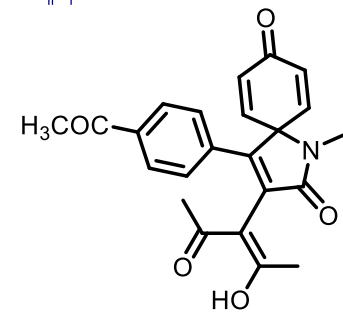

3g

<sup>13</sup>C NMR, CDCl<sub>3</sub>, 101MHz

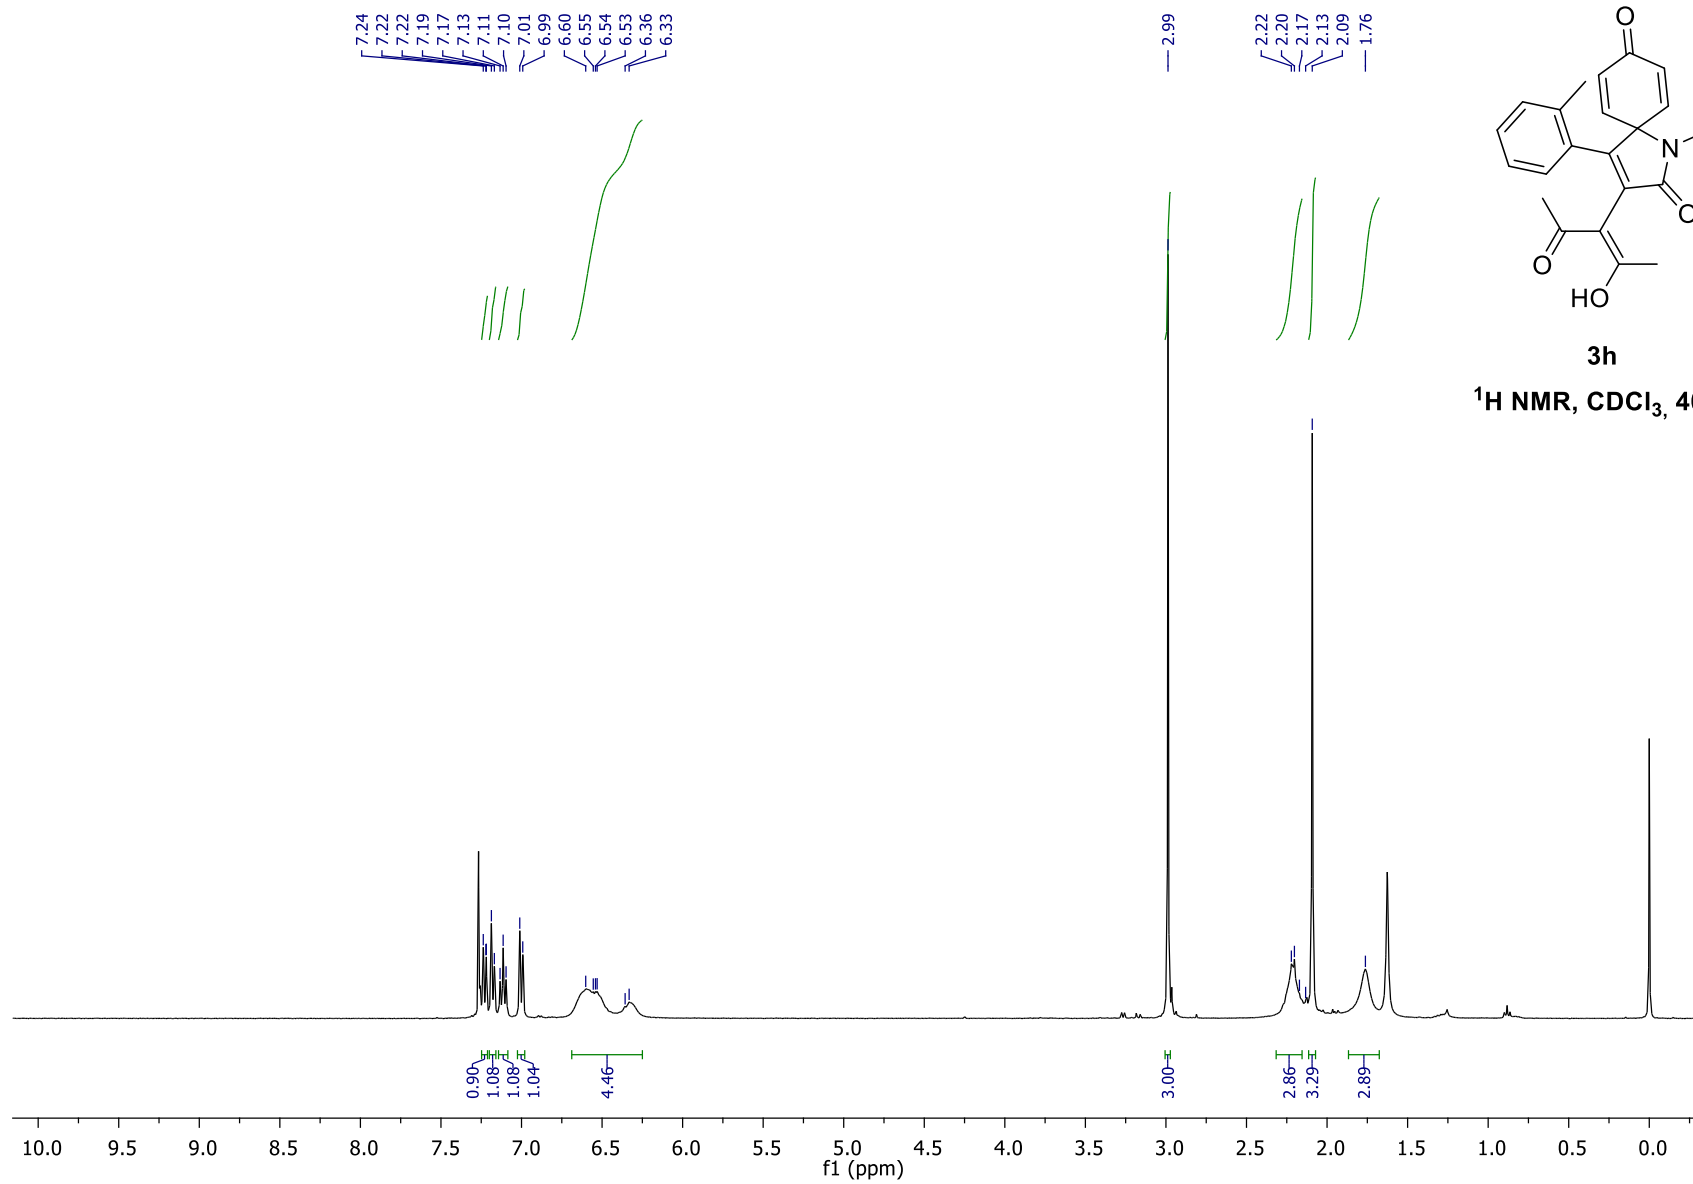

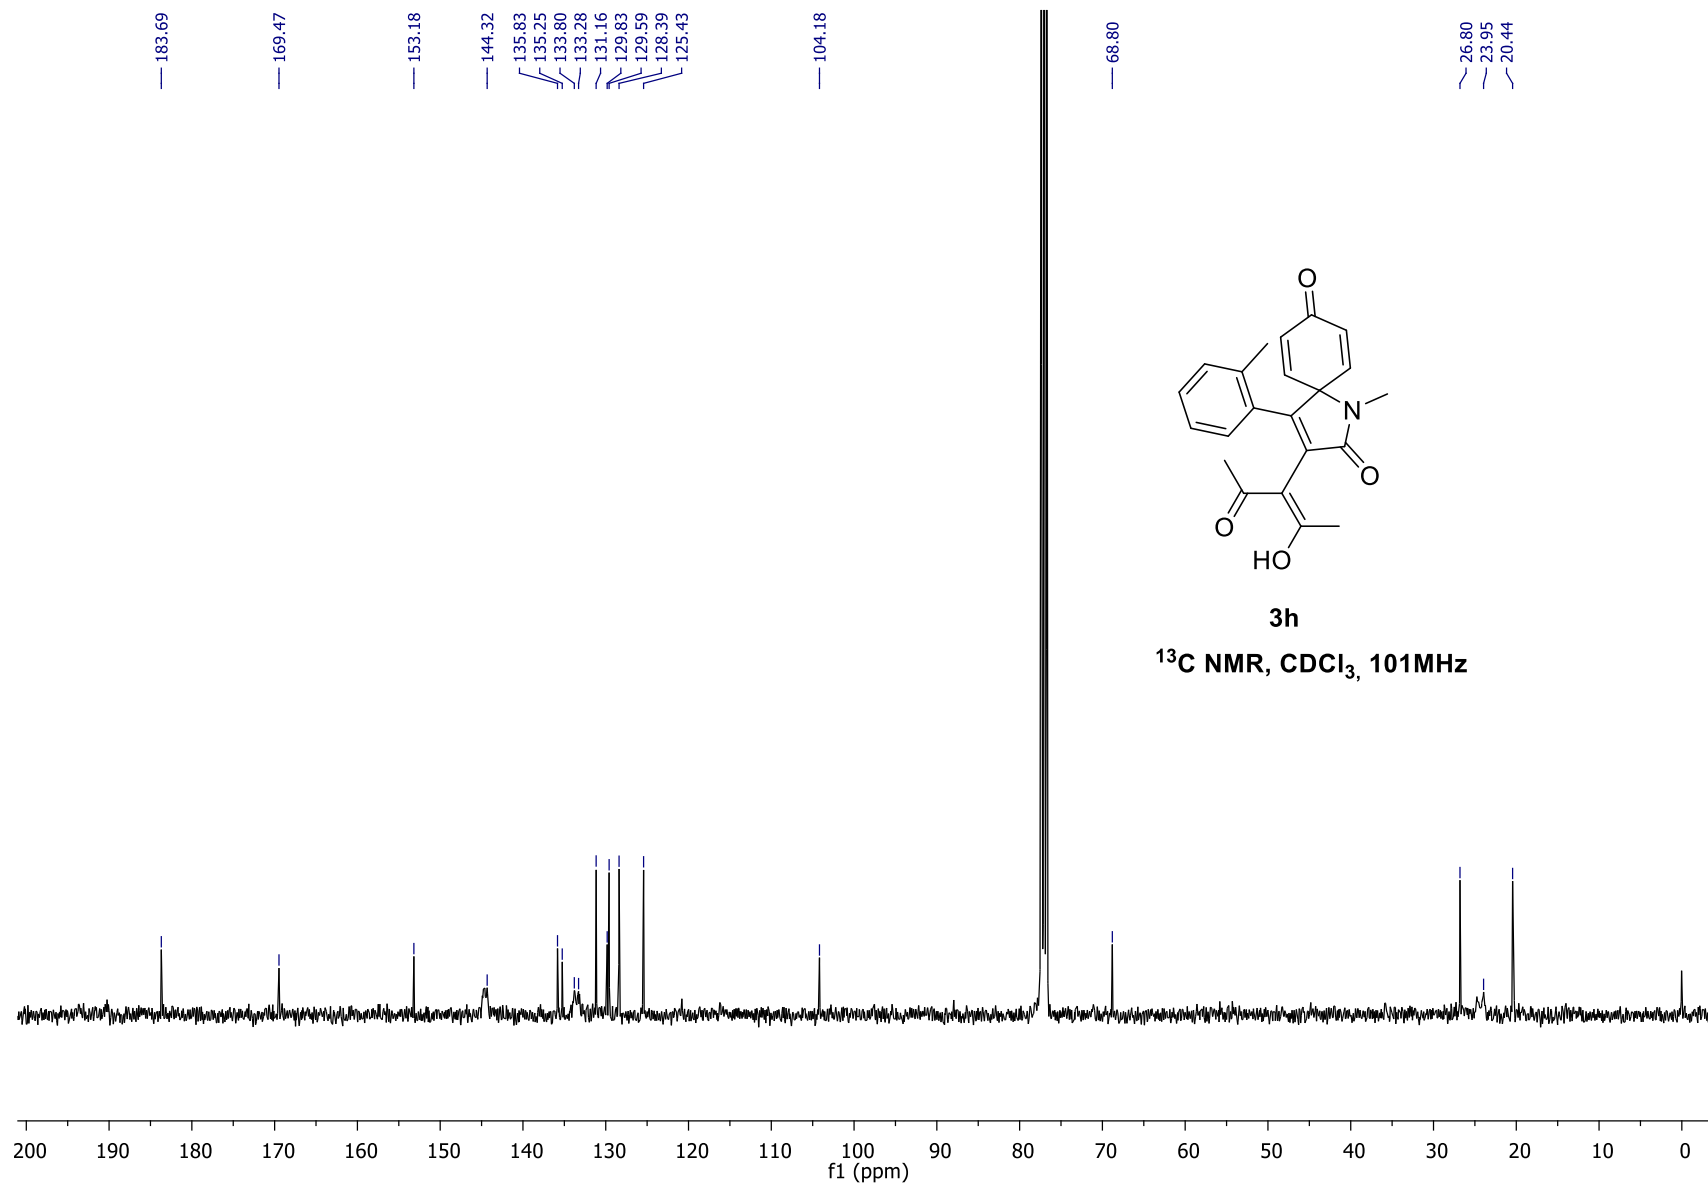



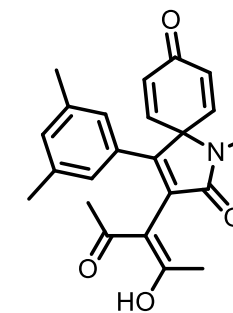

**3i**  
<sup>1</sup>H NMR, CDCl<sub>3</sub>, 500MHz

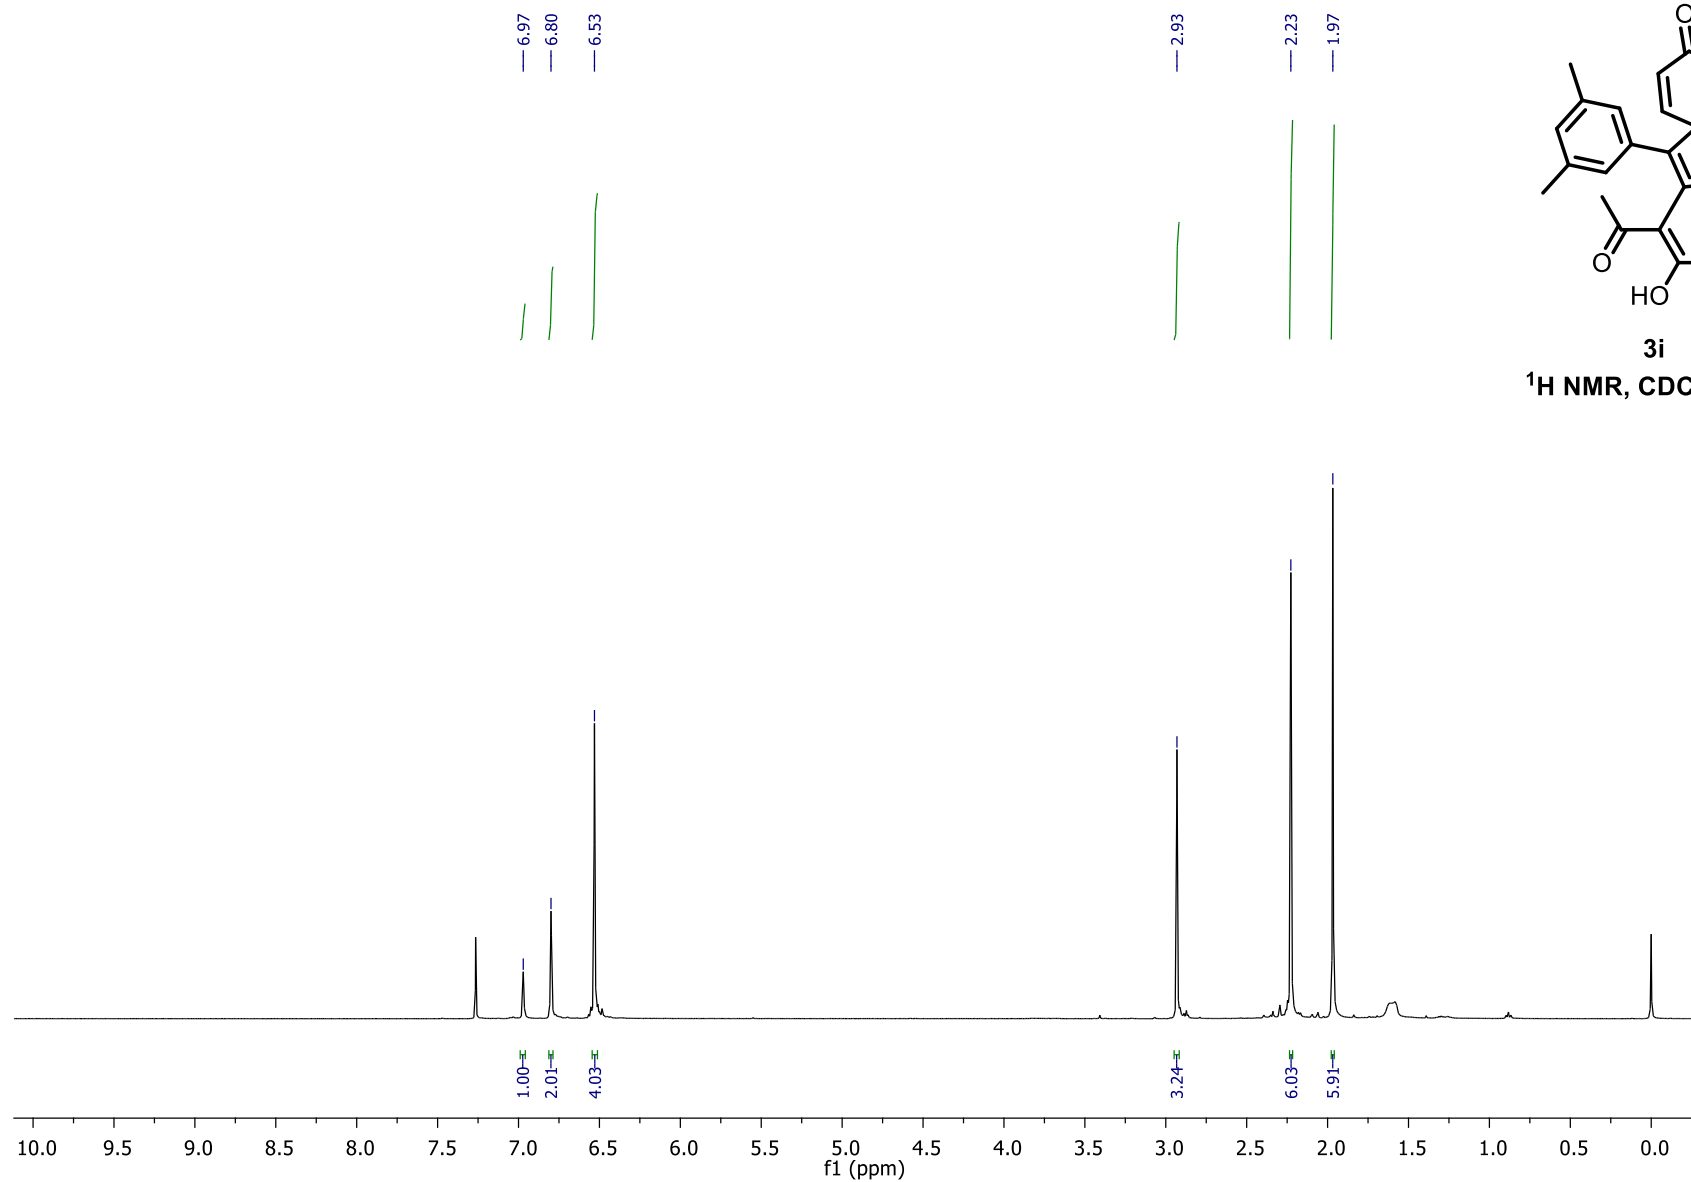

DATTA-M009

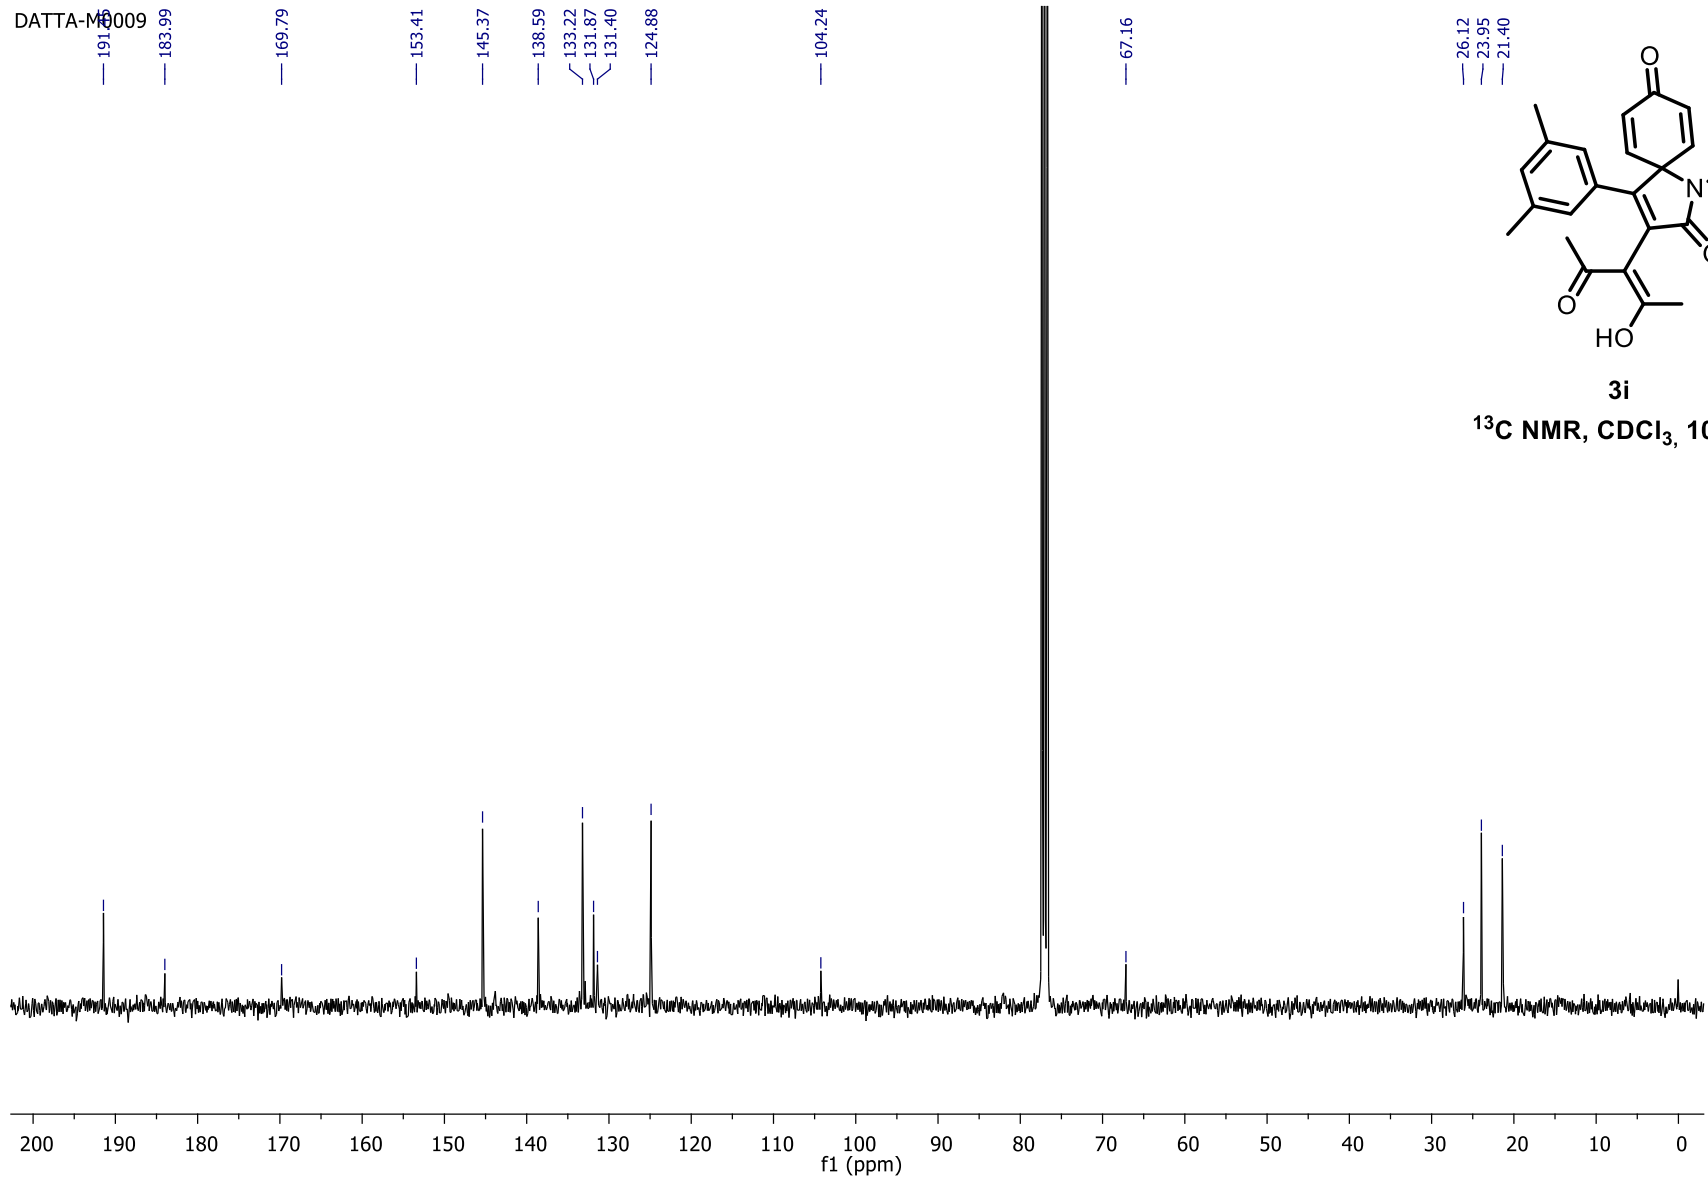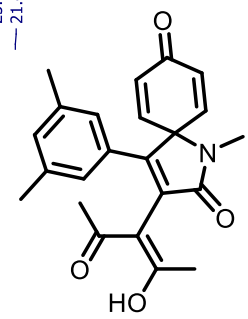

**3i**  
**<sup>13</sup>C NMR, CDCl<sub>3</sub>, 101MHz**

DATTA-M0009

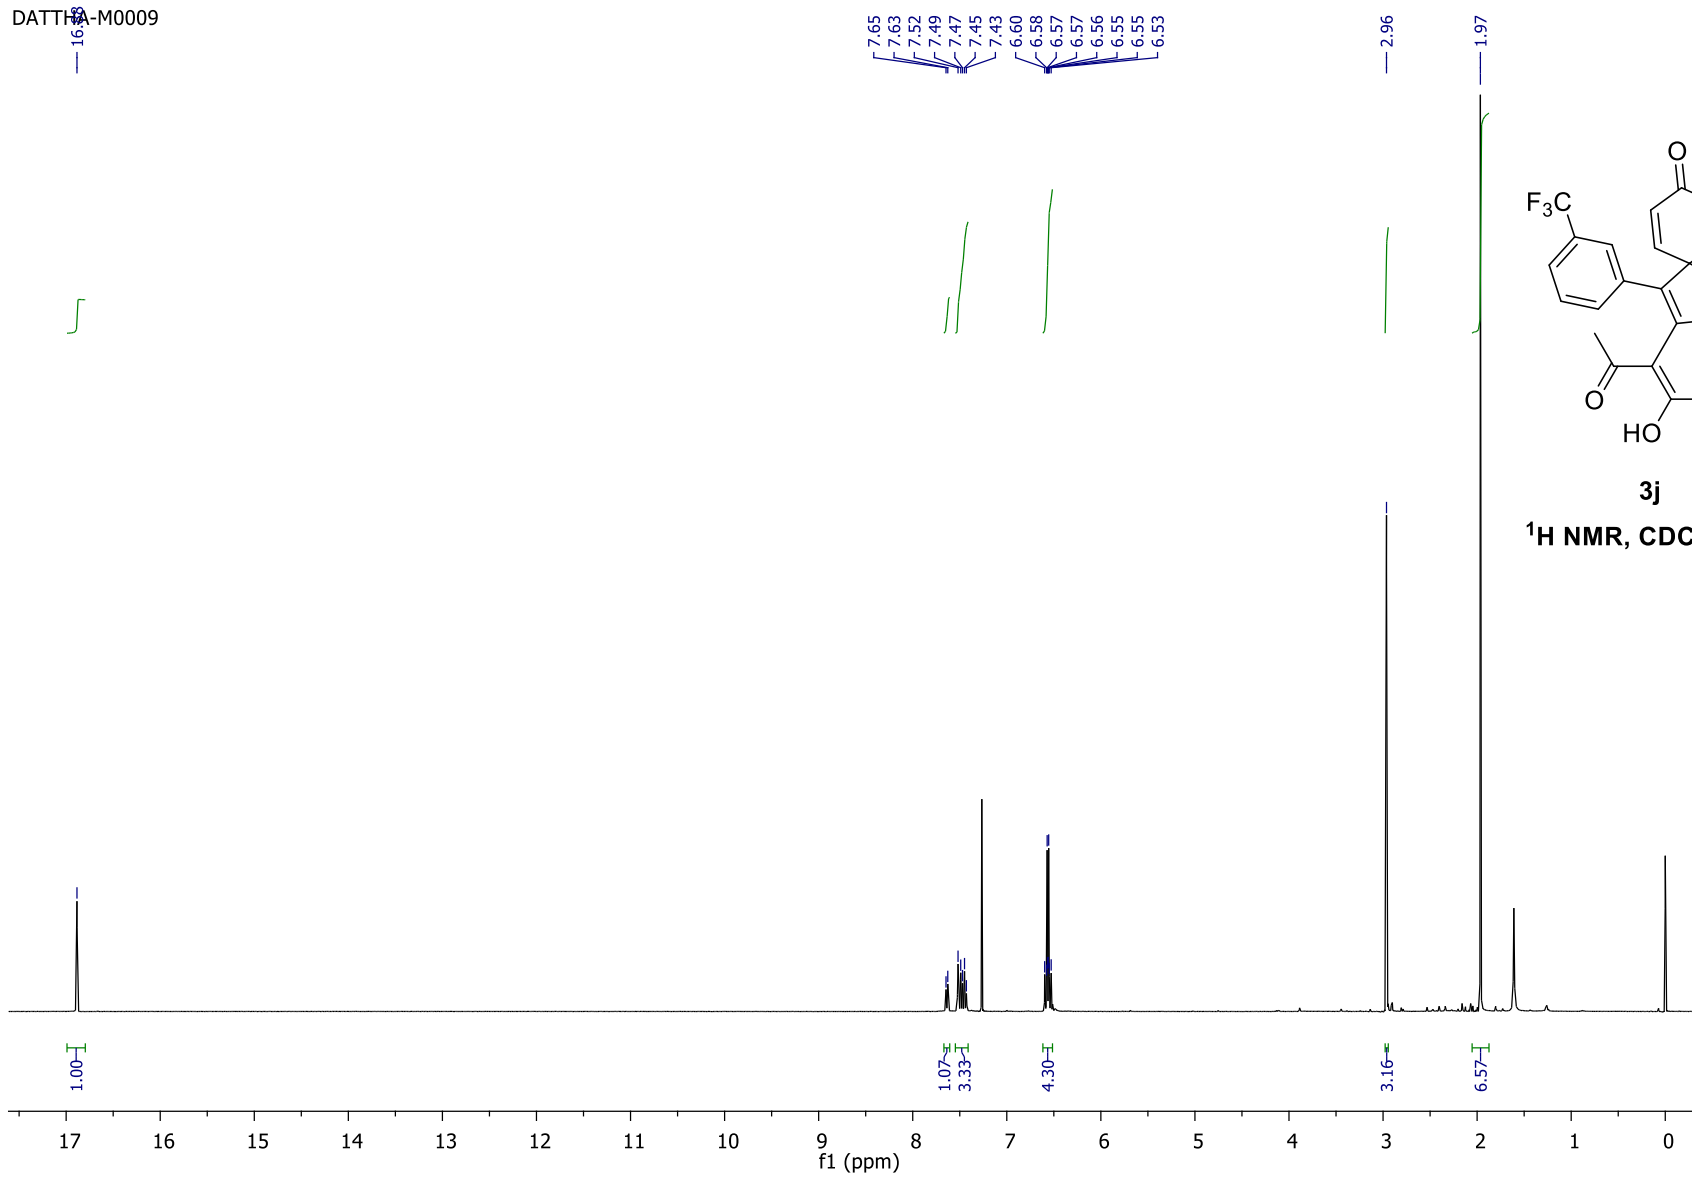

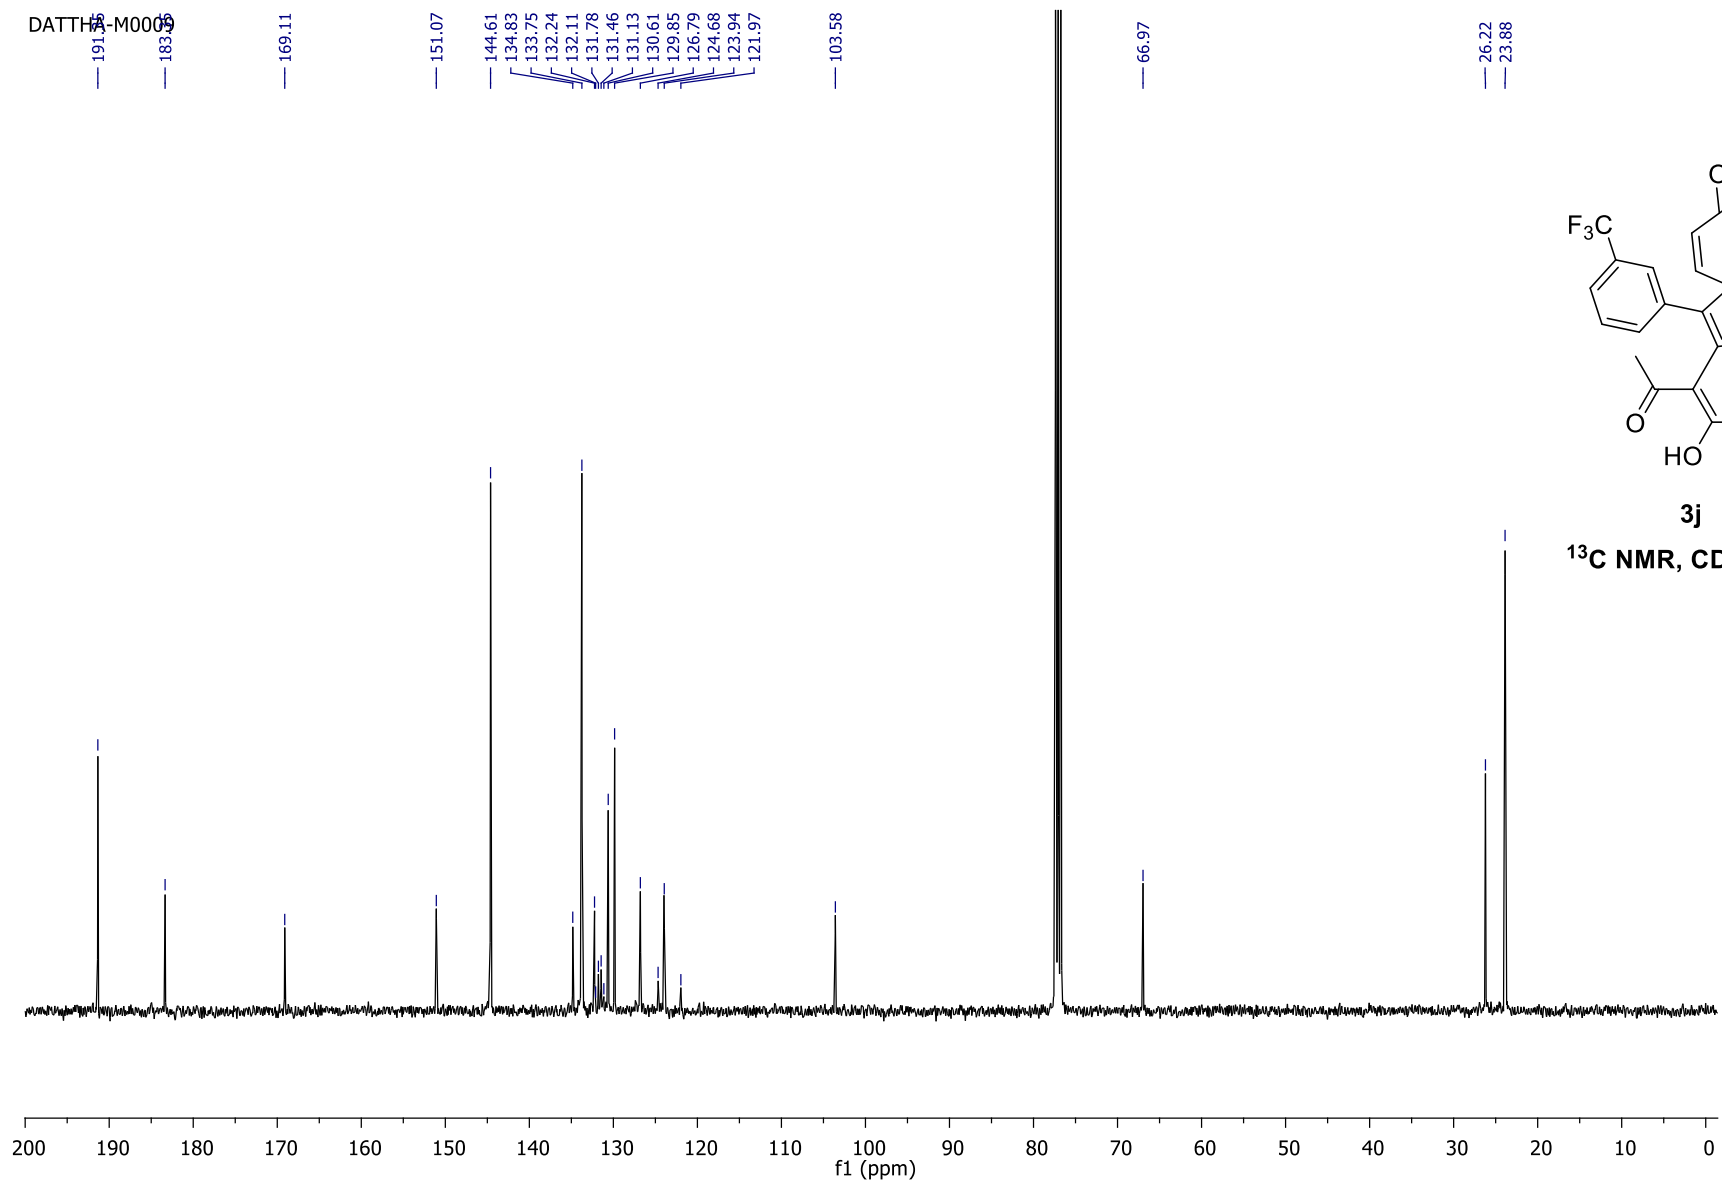

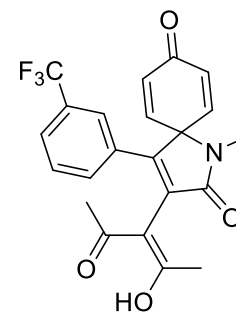

3j

<sup>19</sup>F NMR, CDCl<sub>3</sub>, 377MHz

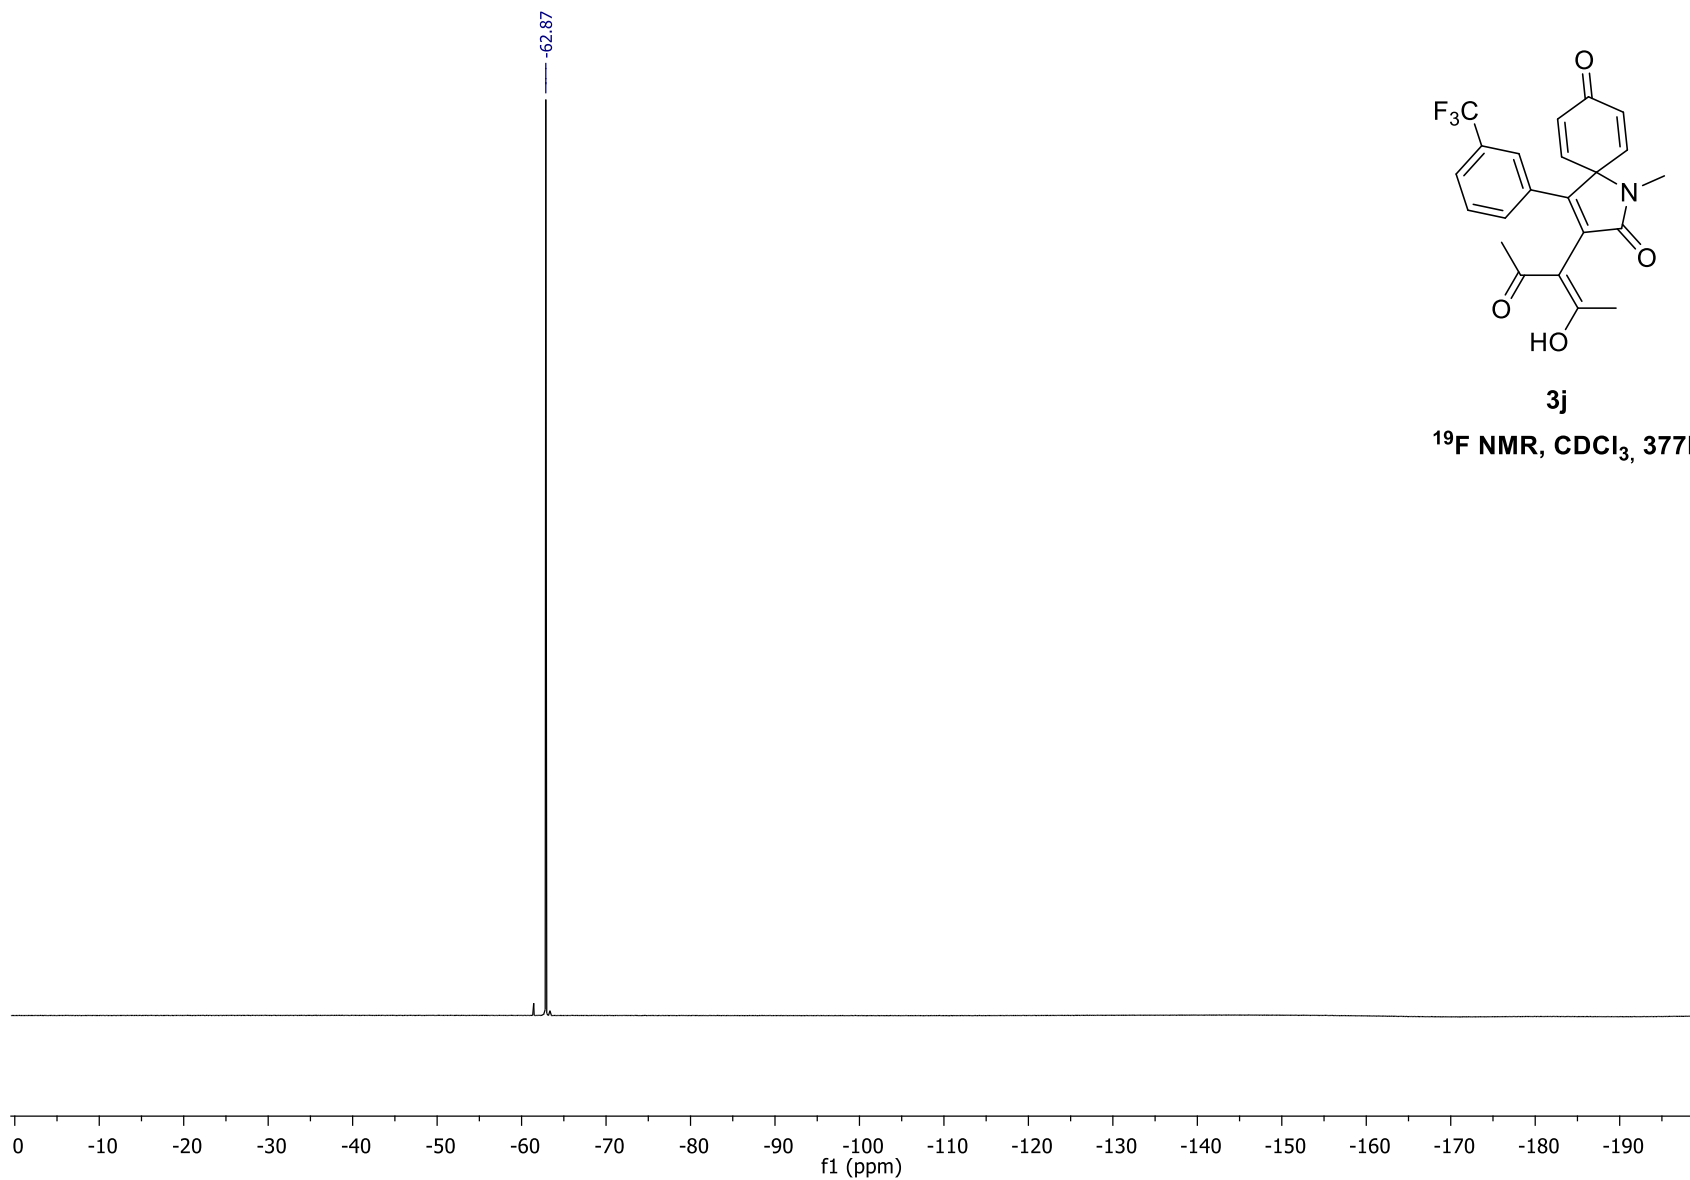

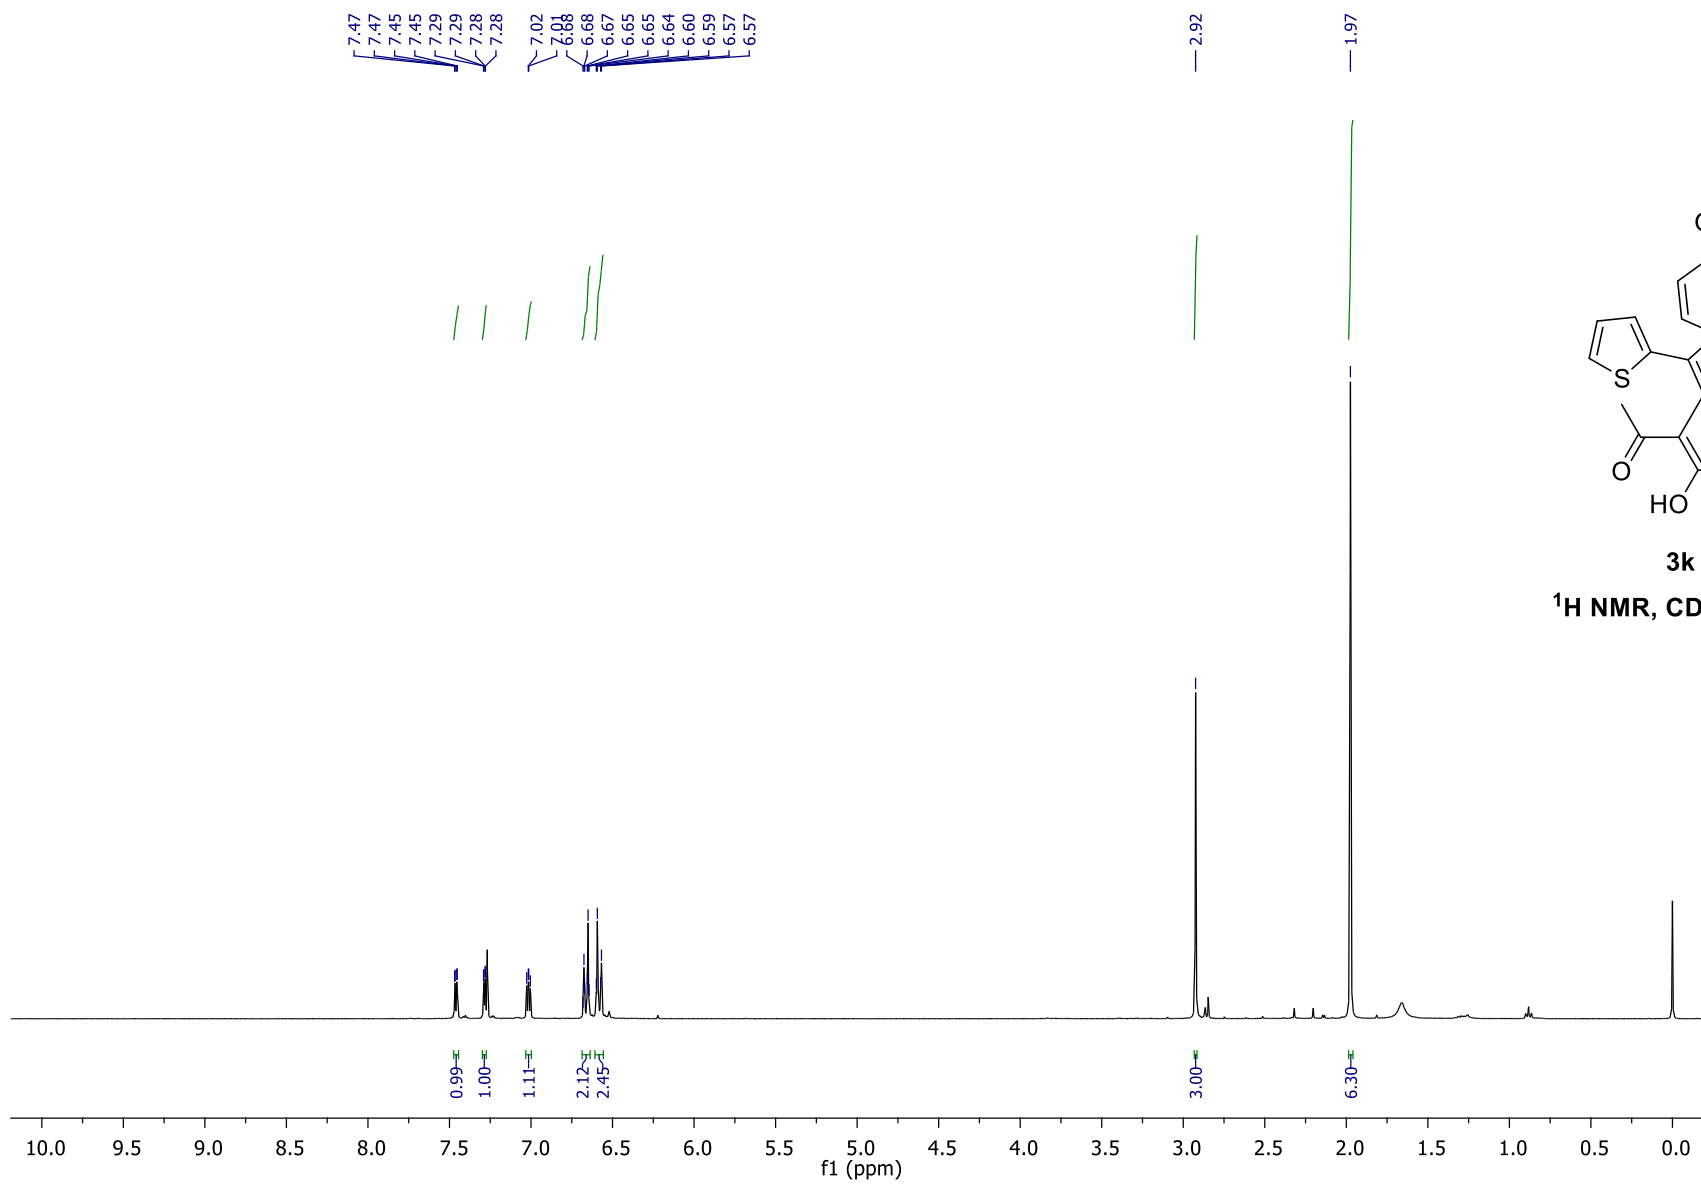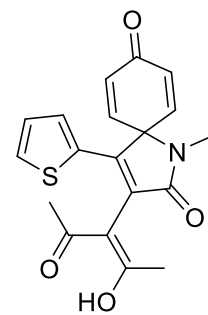

**3k**

**<sup>1</sup>H NMR, CDCl<sub>3</sub>, 400MHz**

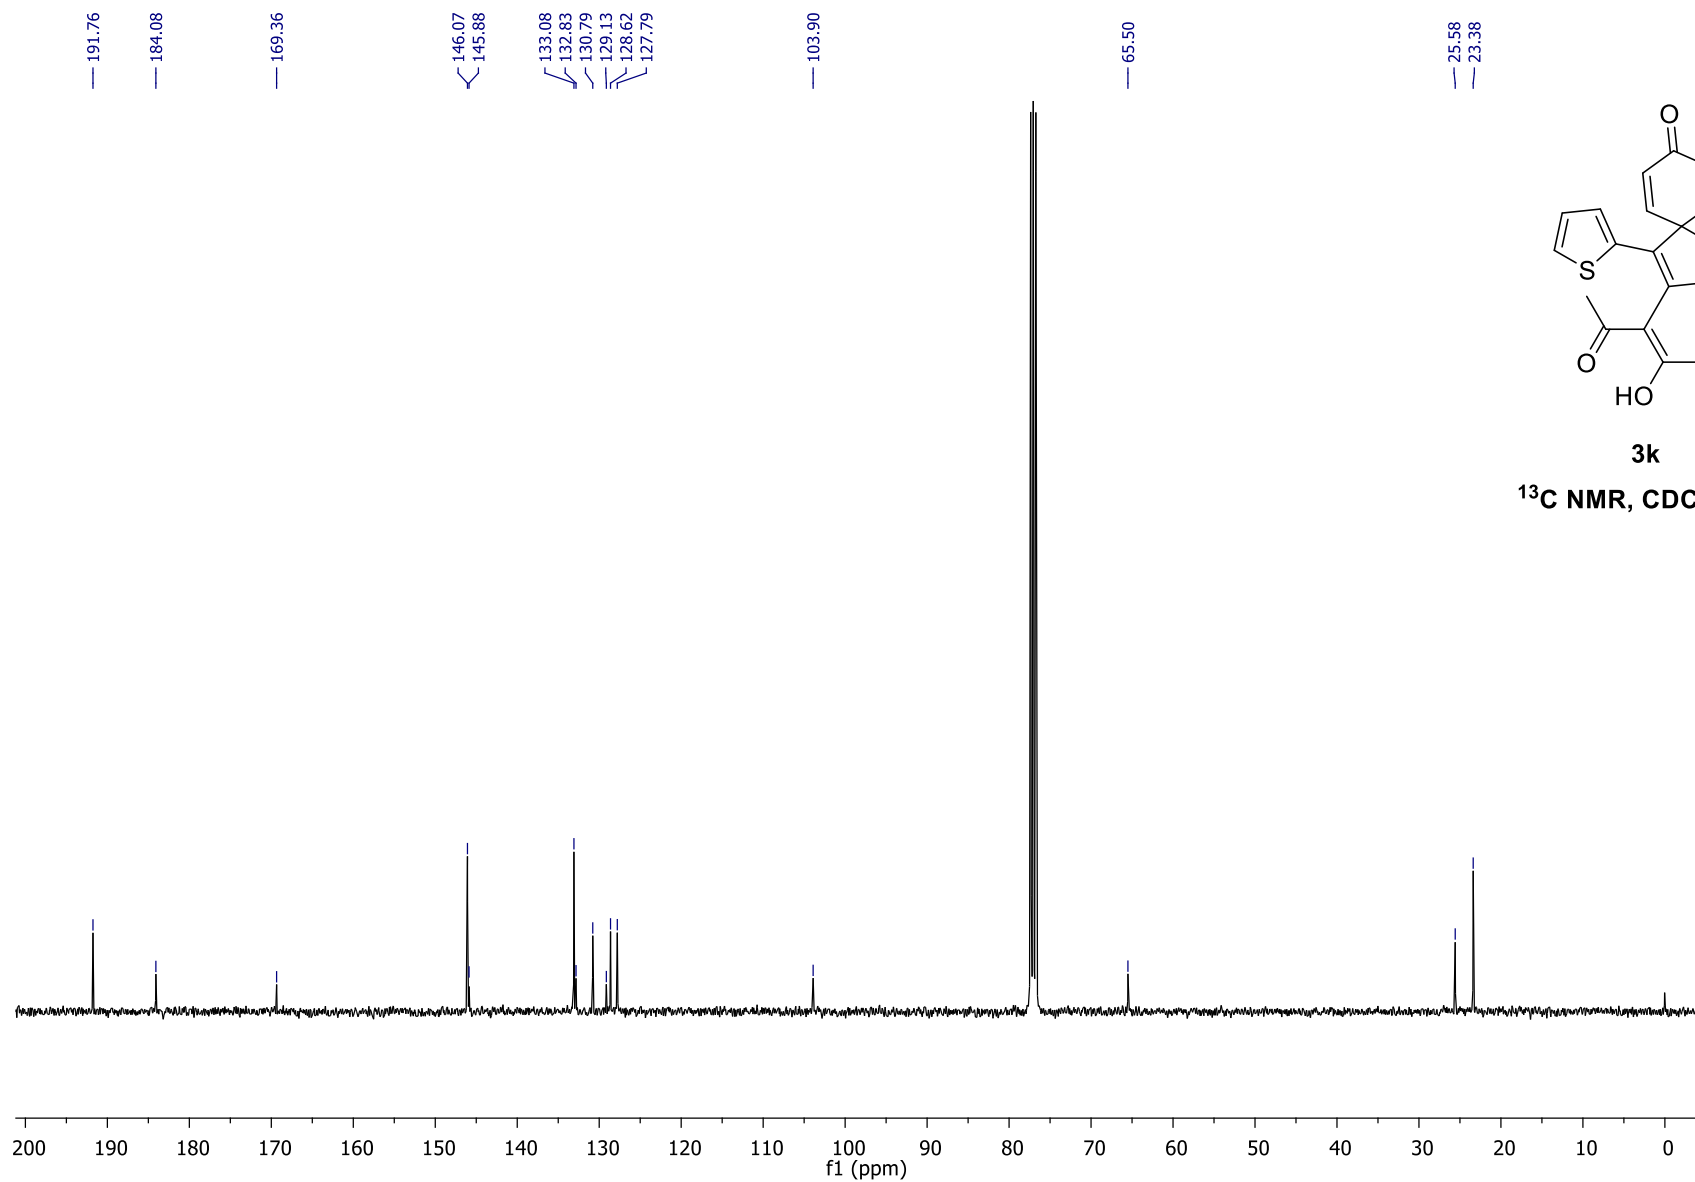

DATTA-M0009

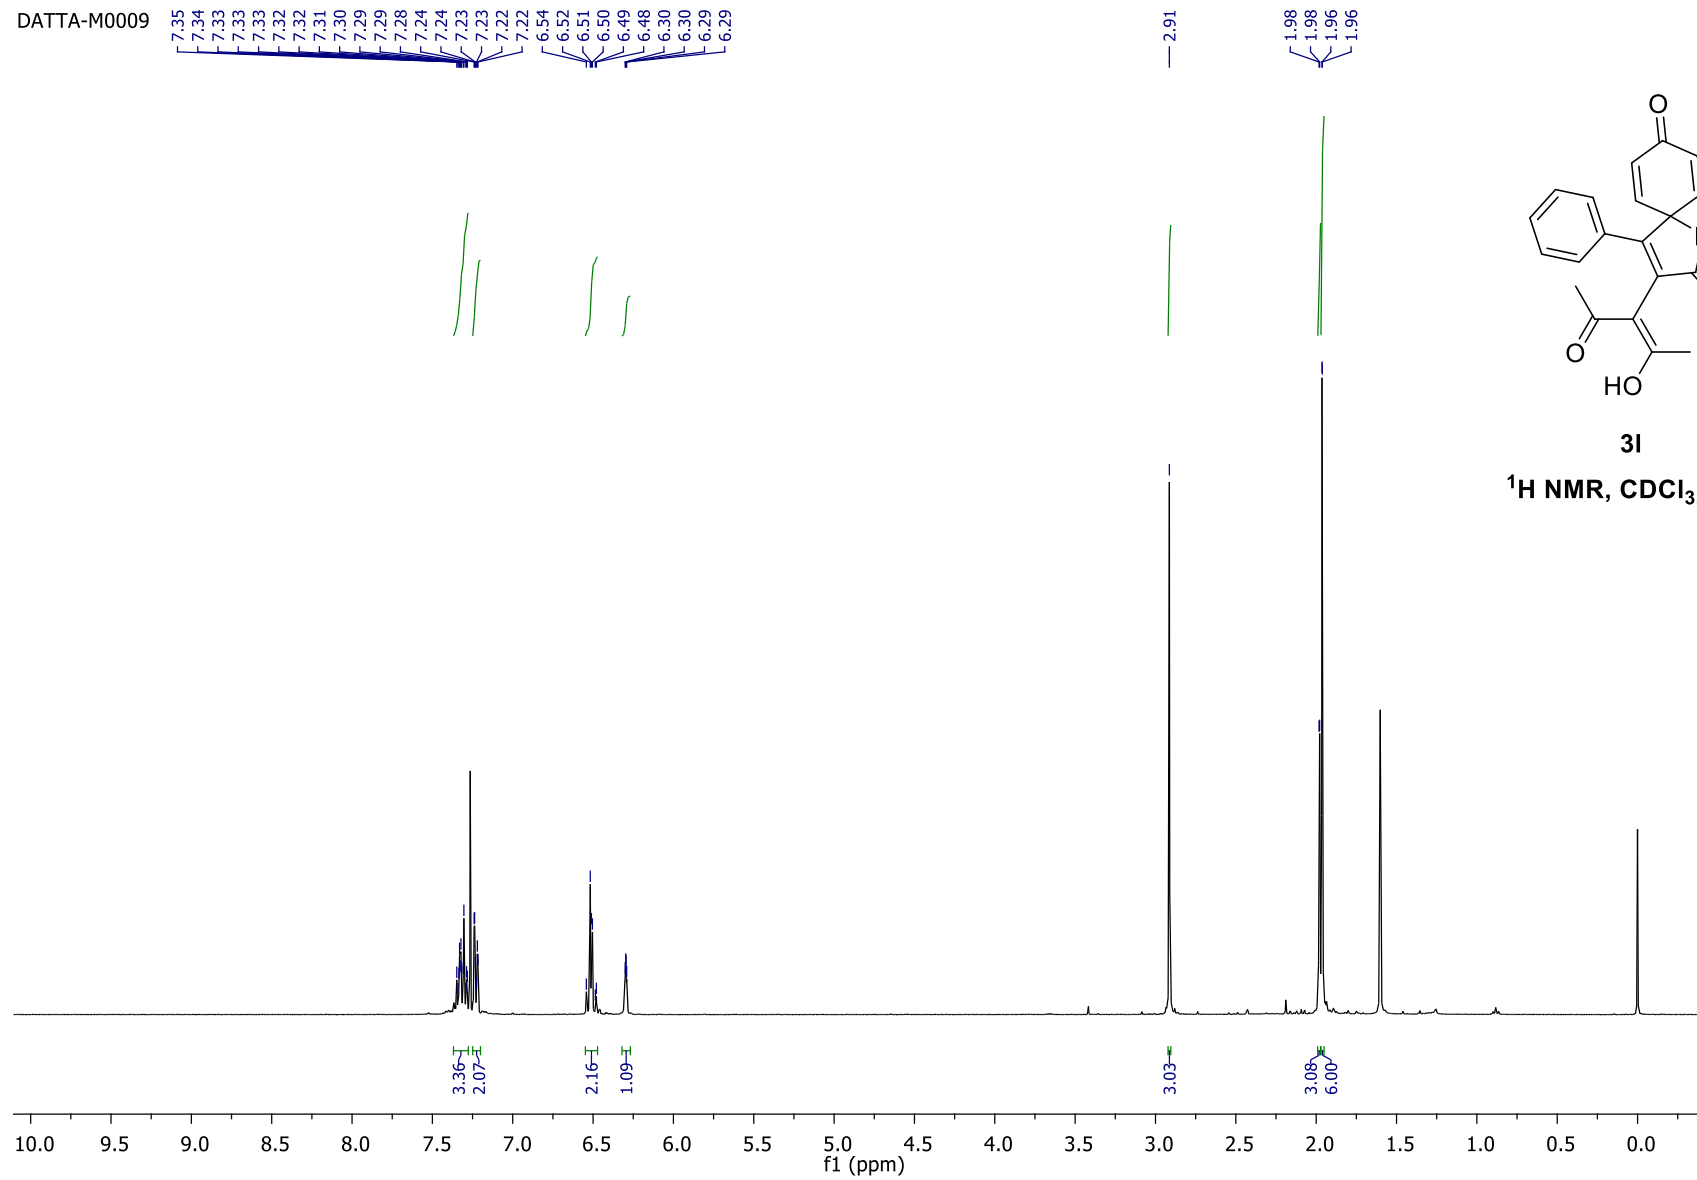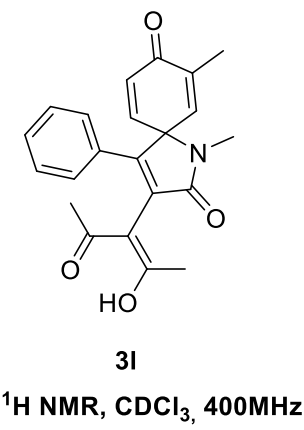



MOUNIKS  
191.15  
191.15  
184.4

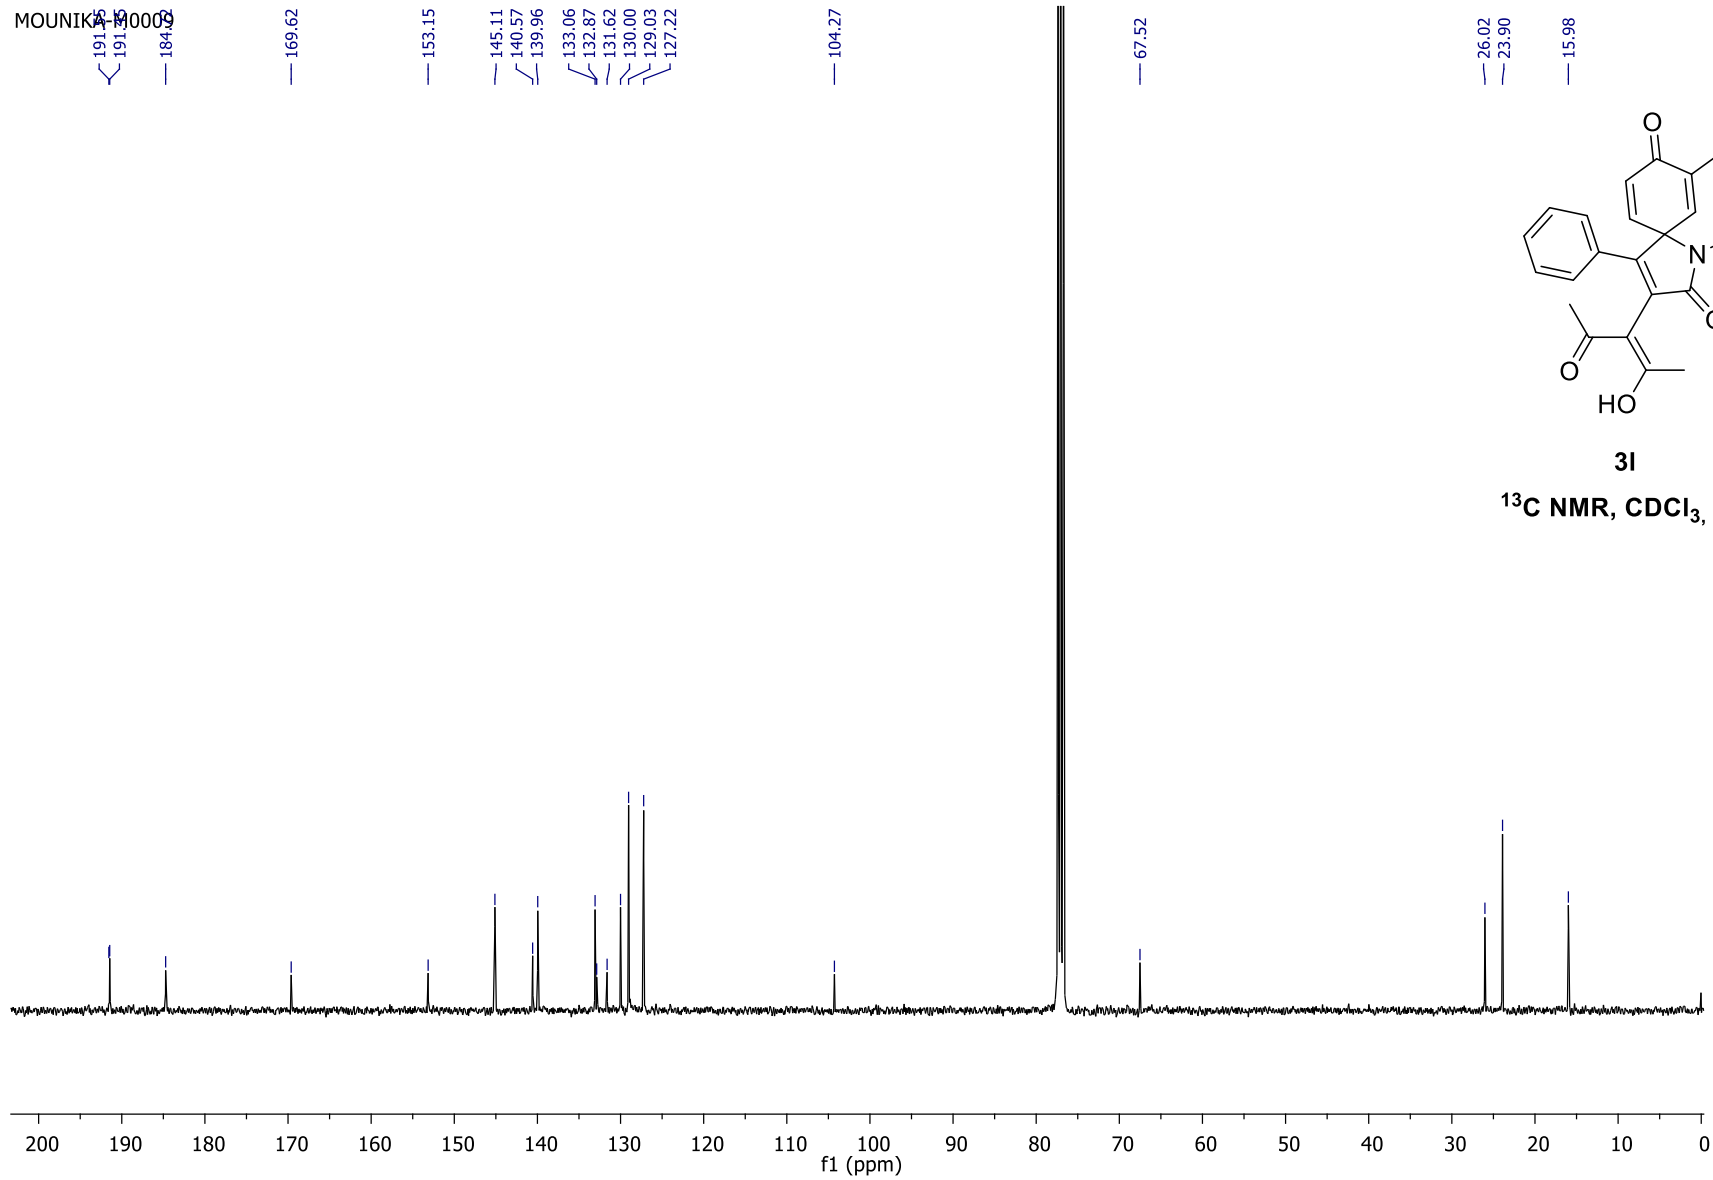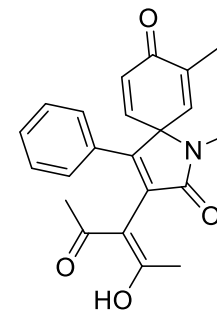

3I

<sup>13</sup>C NMR, CDCl<sub>3</sub>, 101MHz

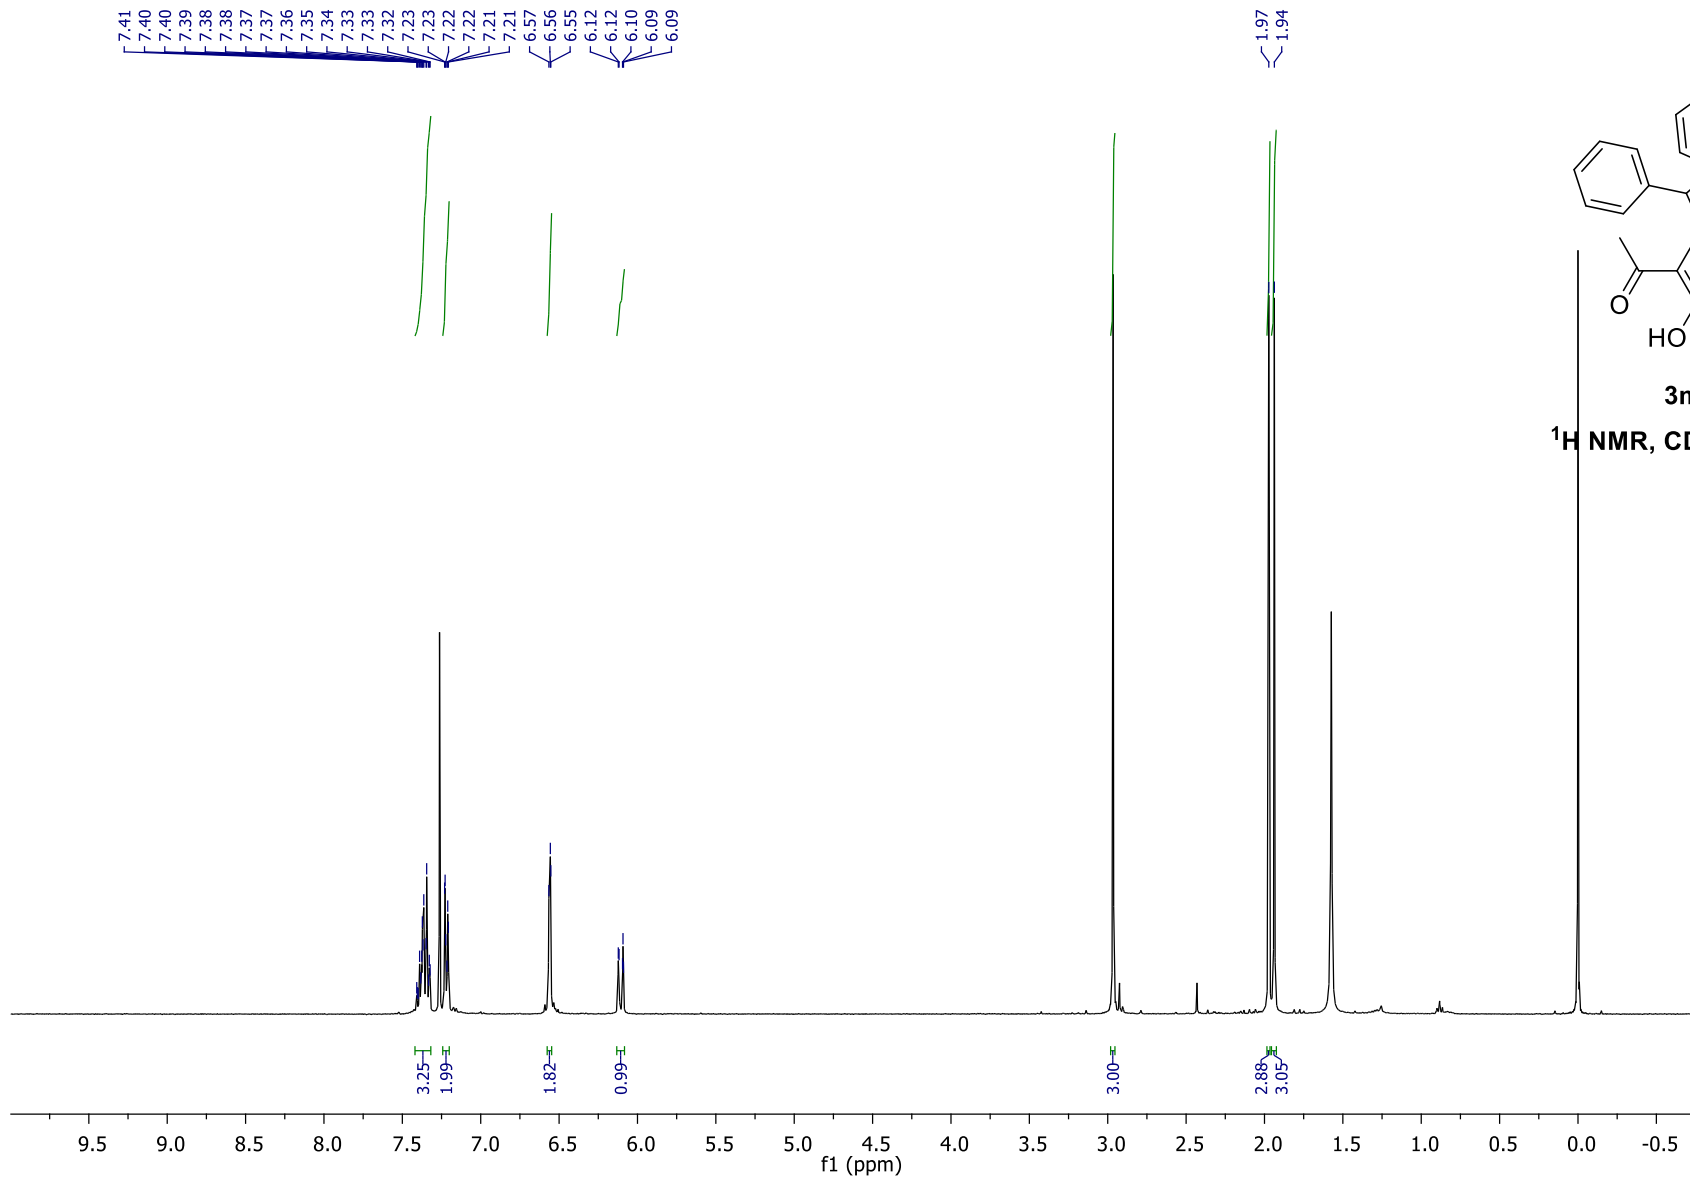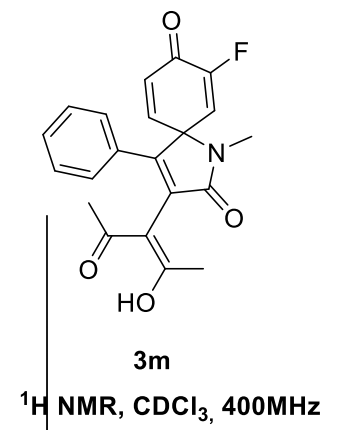

PRIYANKA-1609

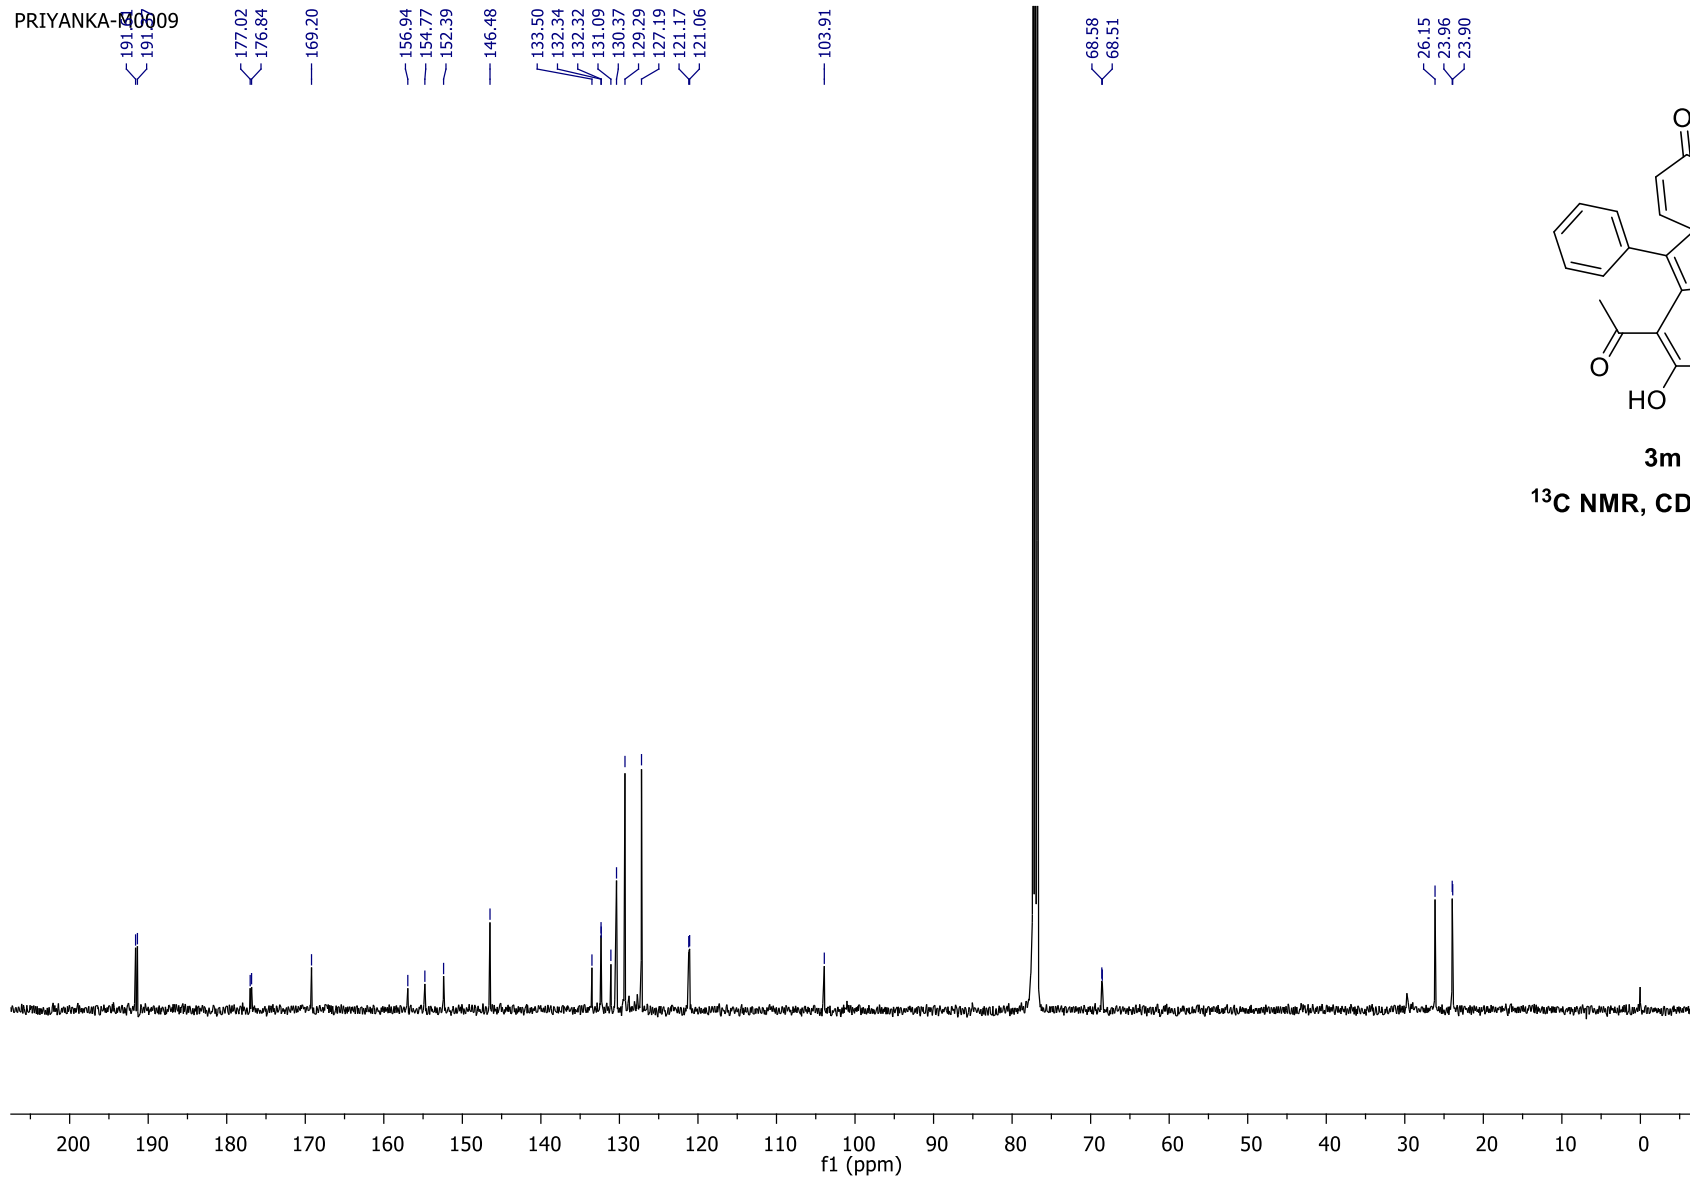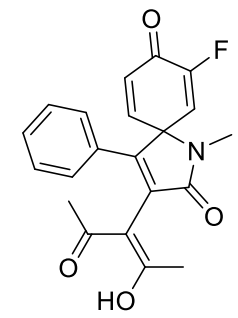

3m

<sup>13</sup>C NMR, CDCl<sub>3</sub>, 126MHz

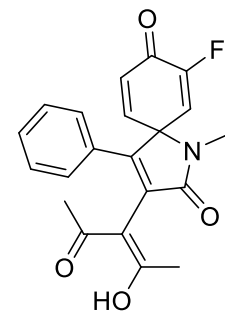

3m

<sup>19</sup>F NMR, CDCl<sub>3</sub>, 377MHz

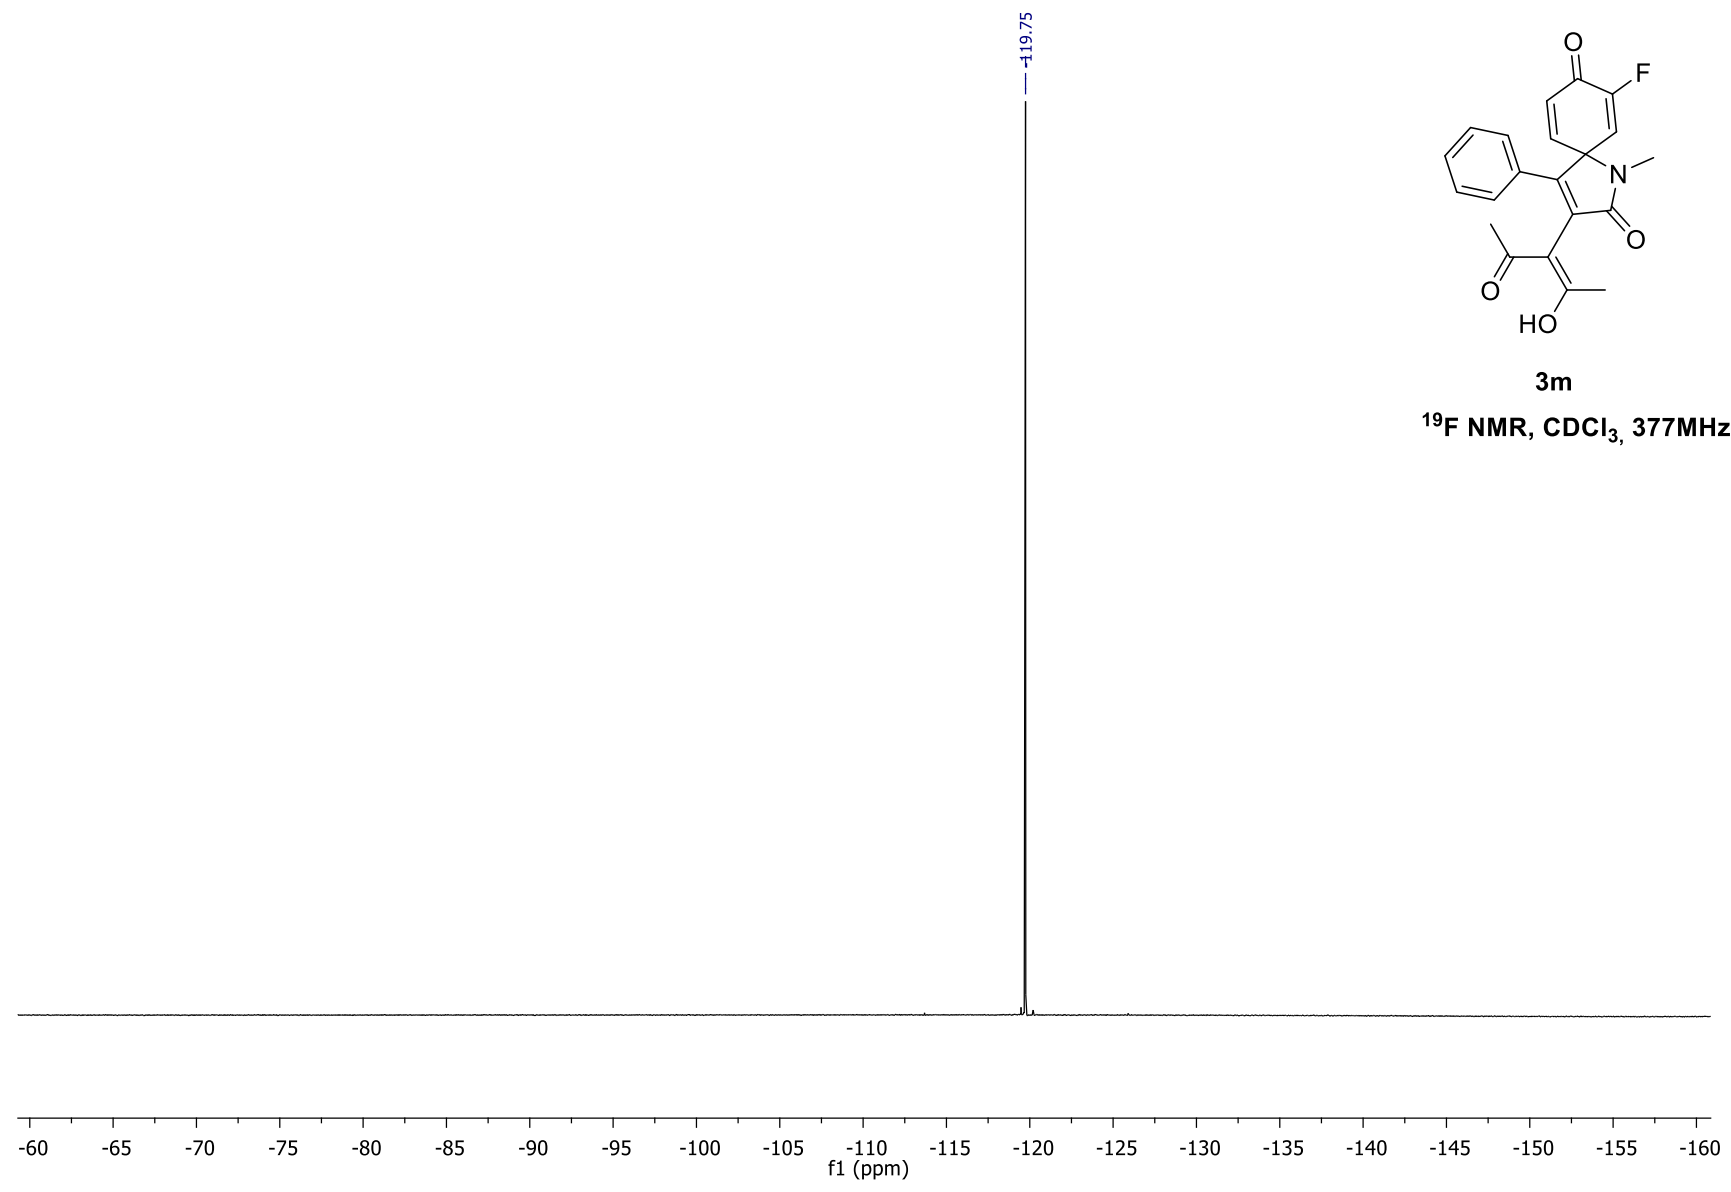

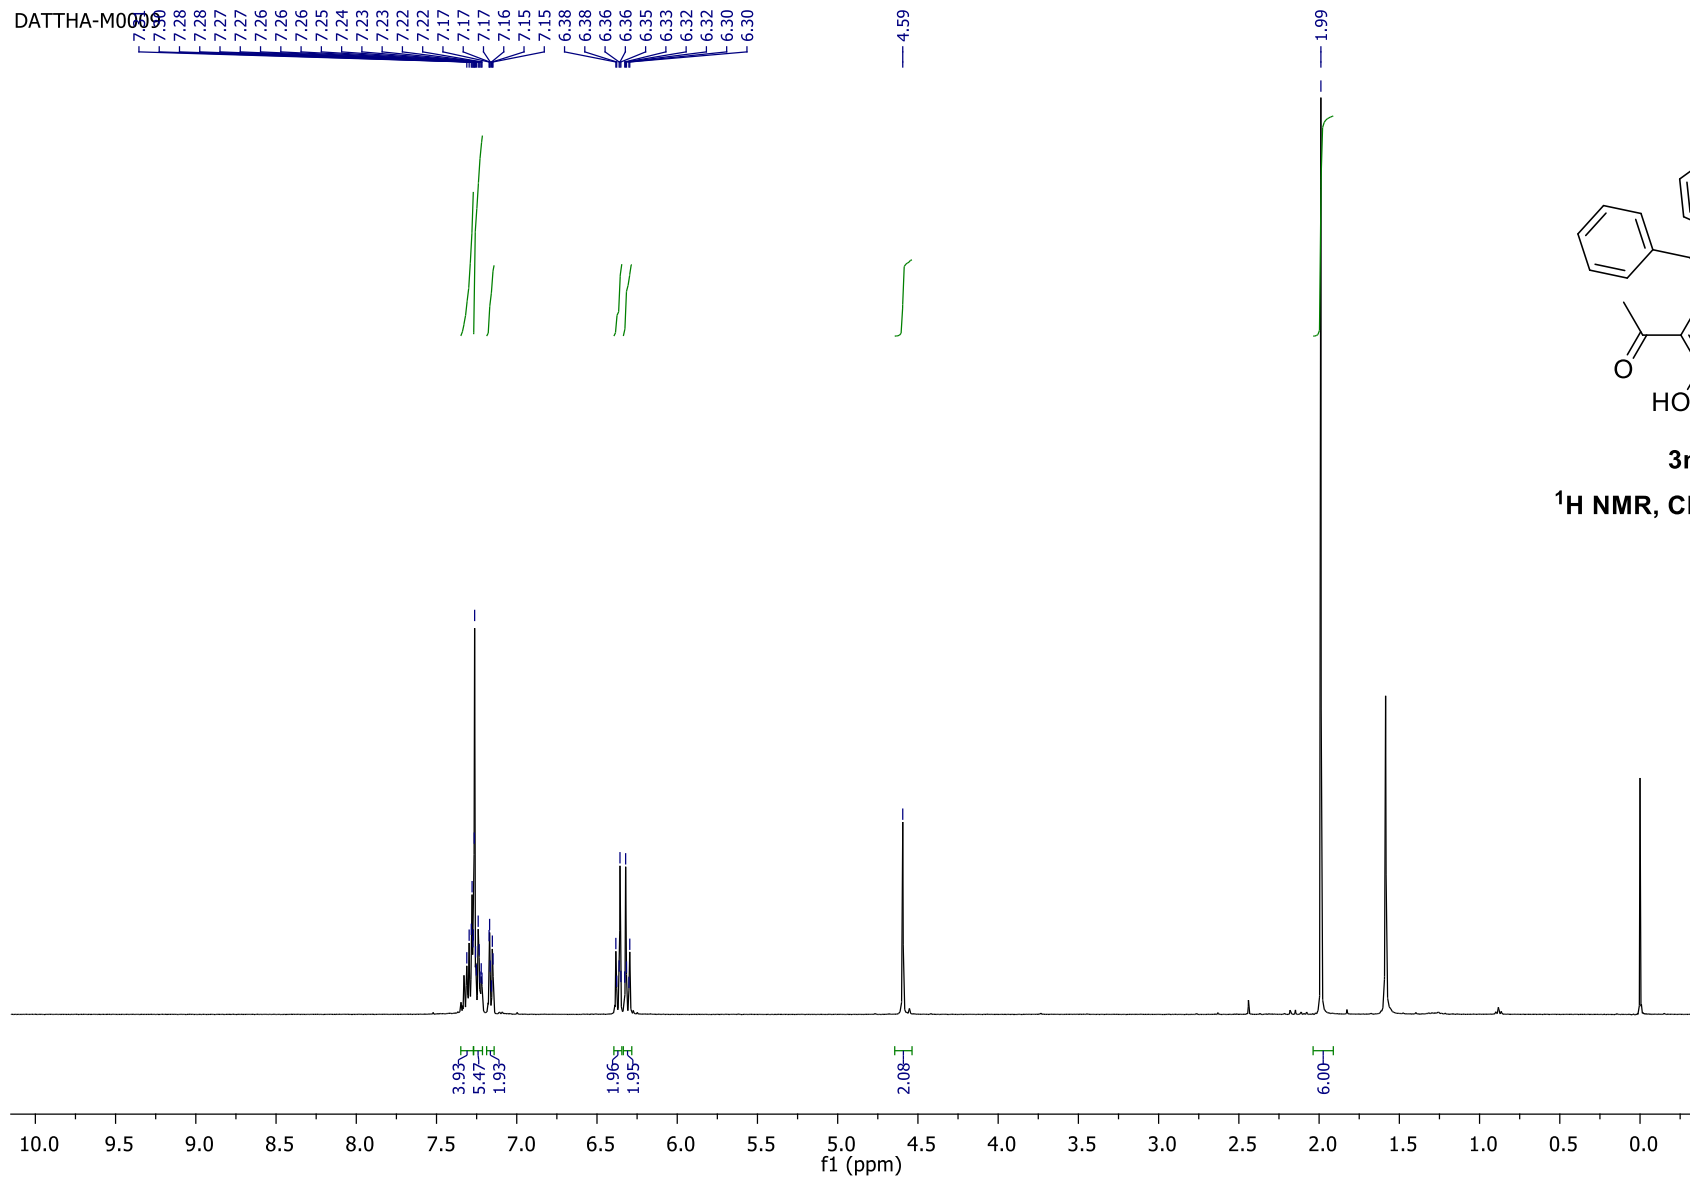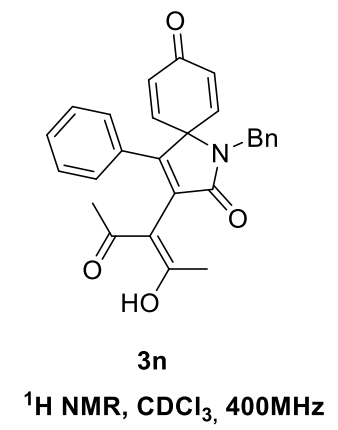

ROSHAN-M0009

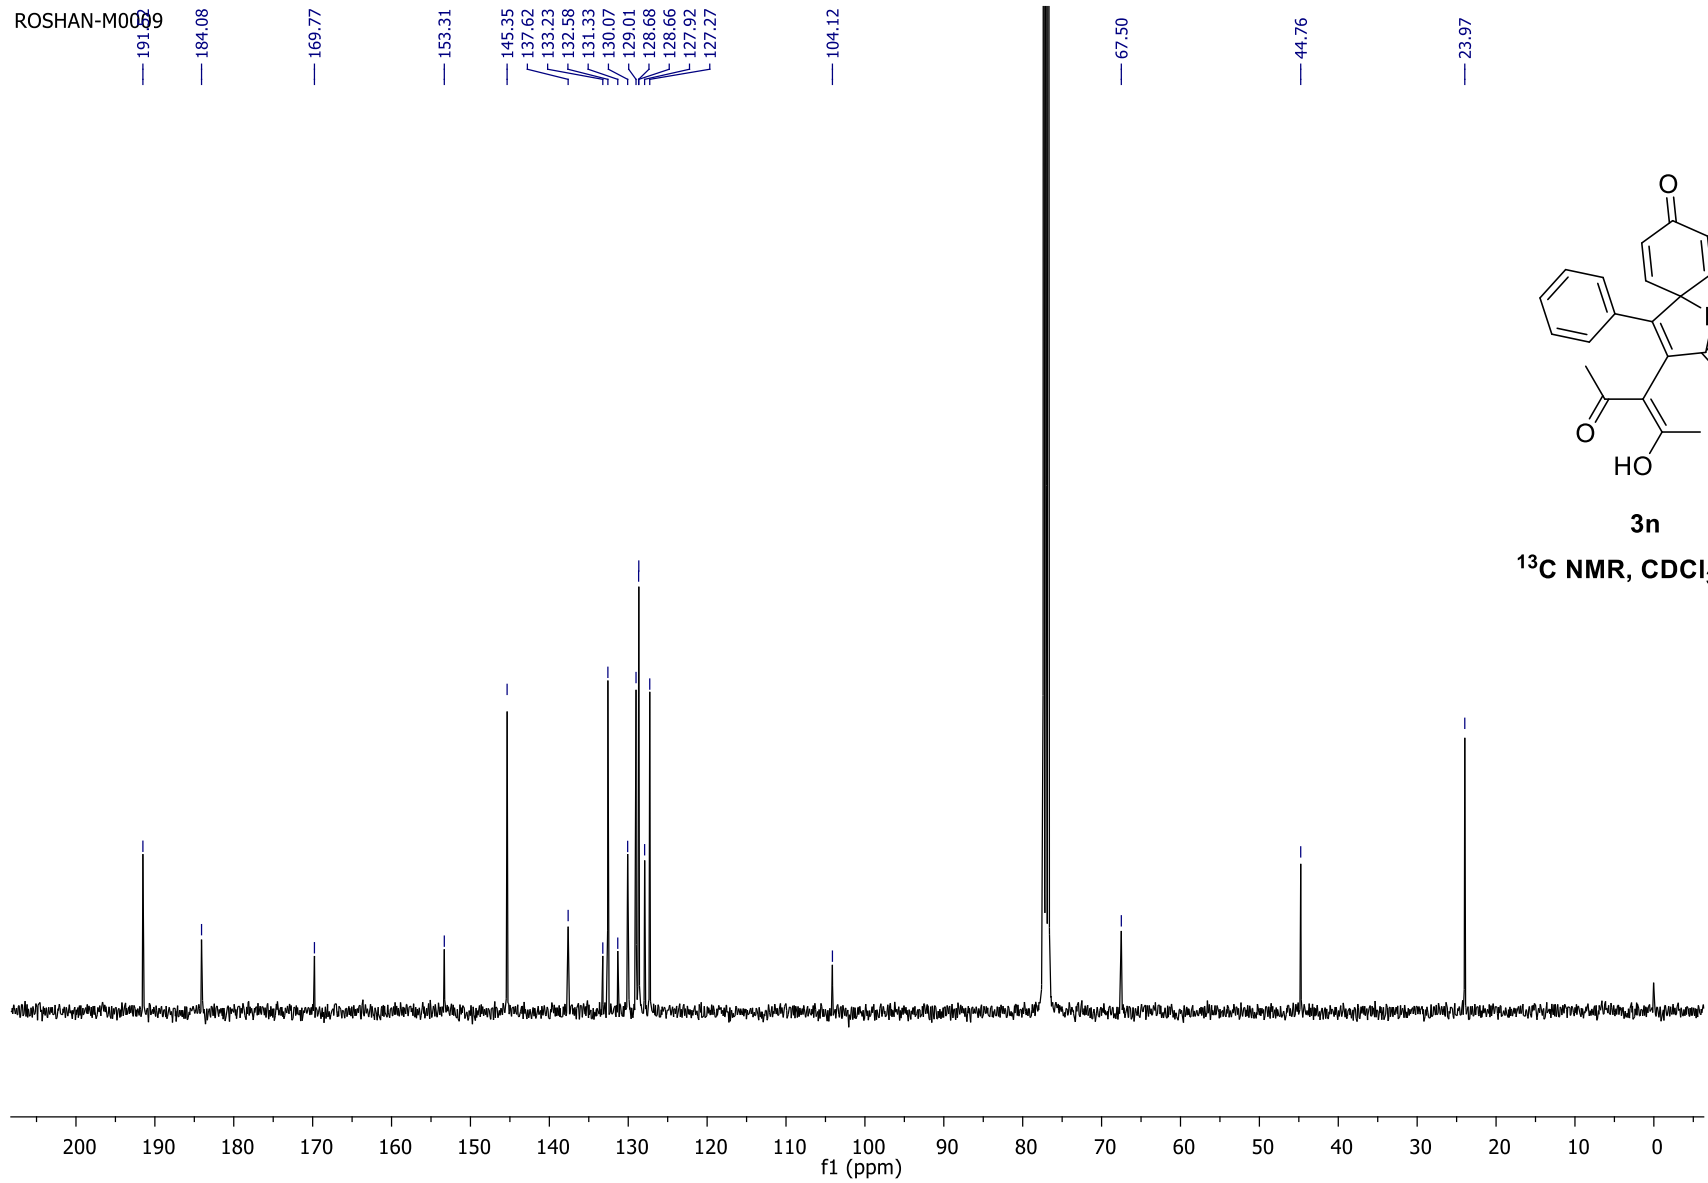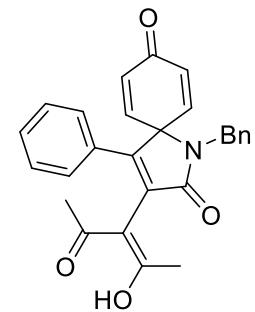

3n

<sup>13</sup>C NMR, CDCl<sub>3</sub>, 101MHz

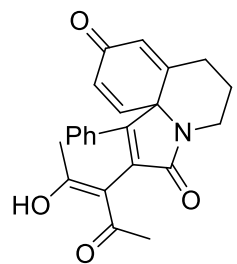

**3o**  
 $^1\text{H}$ ,  $\text{CDCl}_3$ , 500MHz

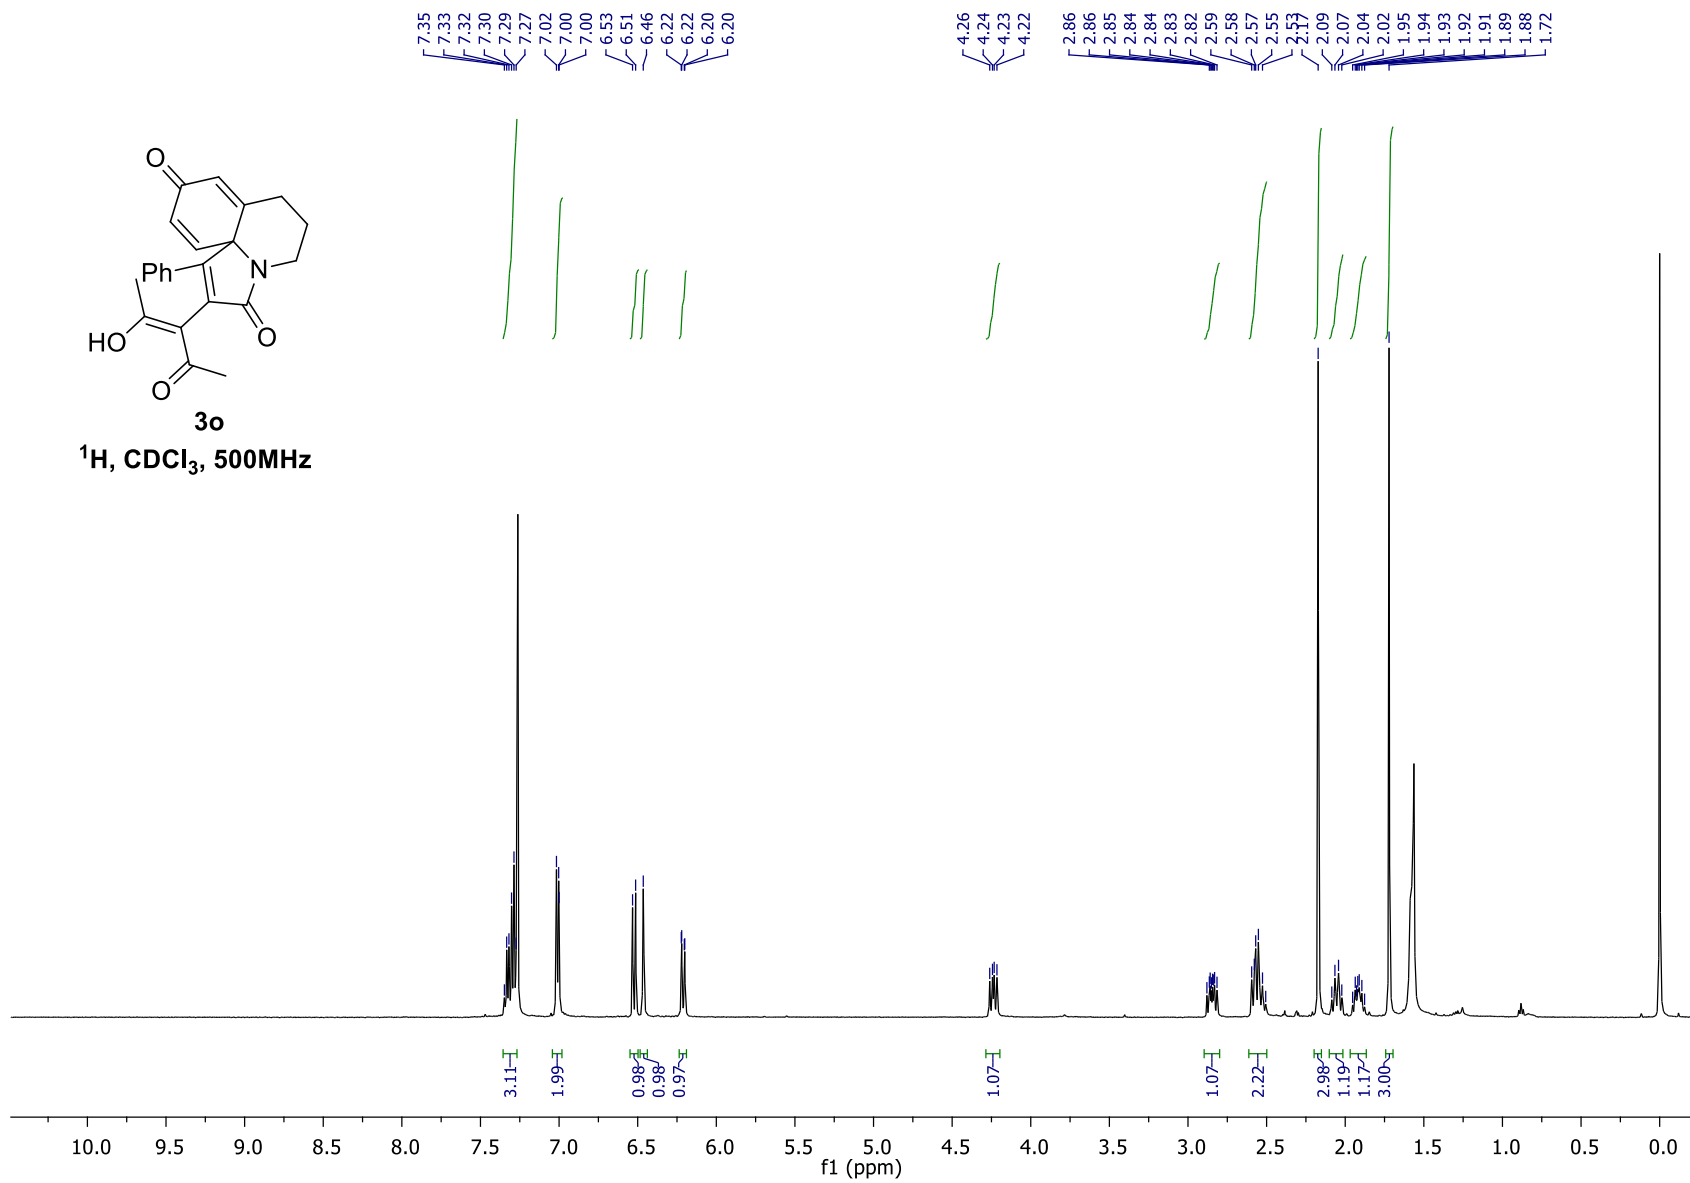

PRIYANKA-M0605

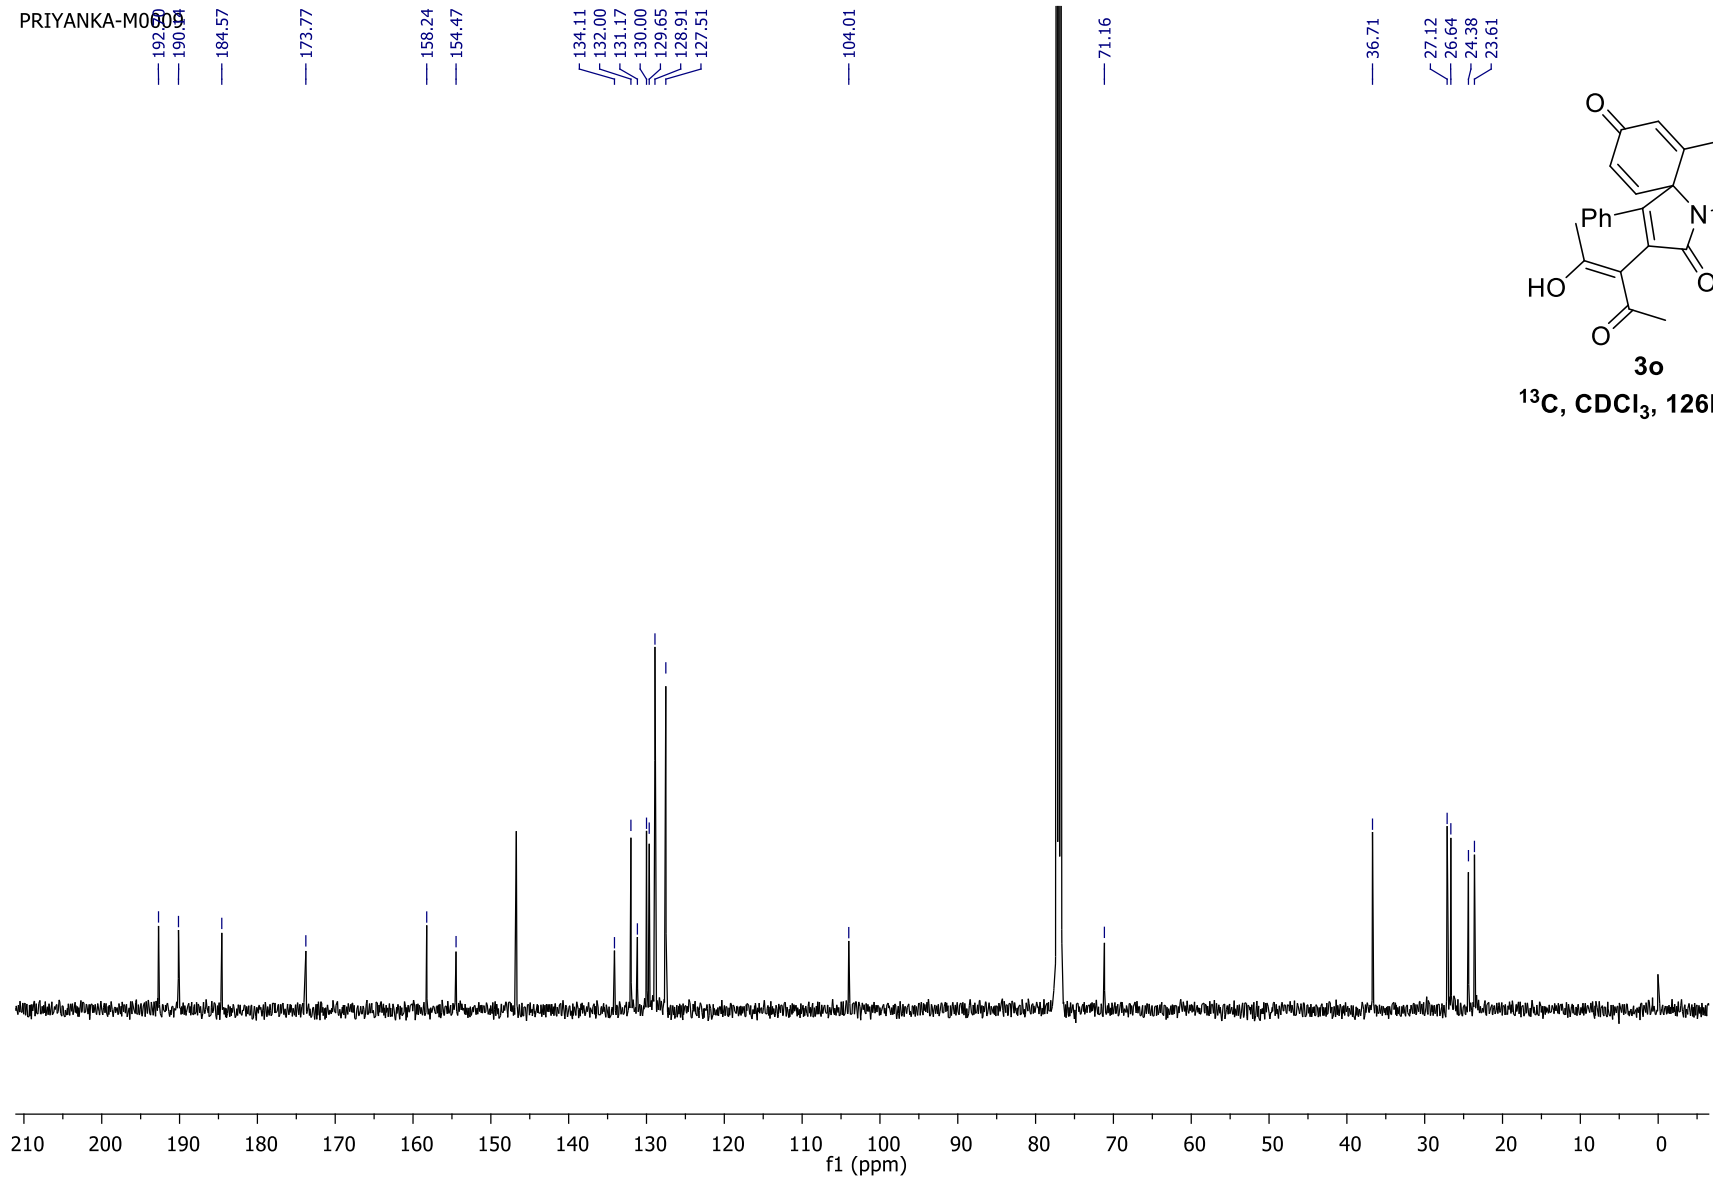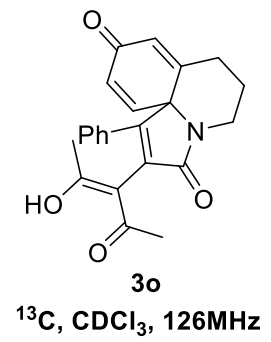



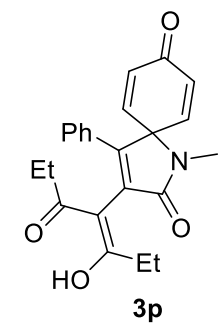

**<sup>1</sup>H NMR, CDCl<sub>3</sub>, 400MHz**

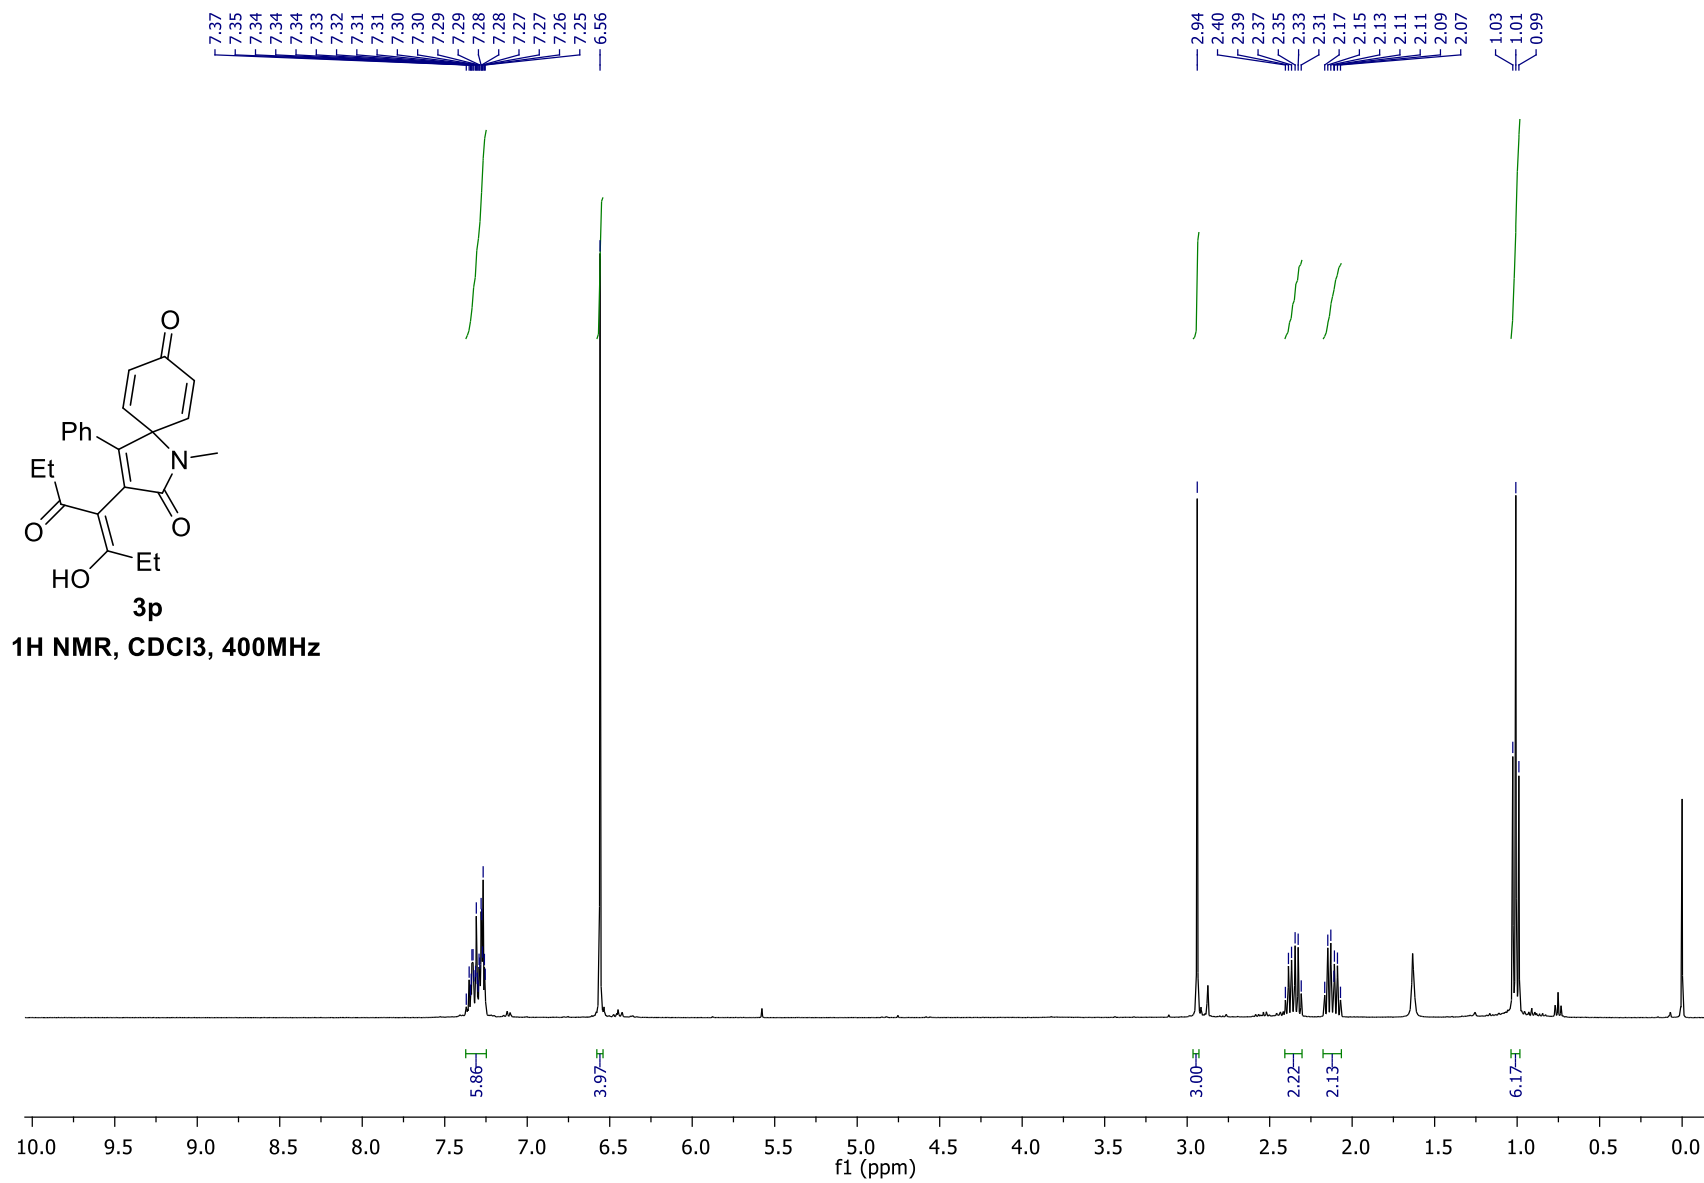

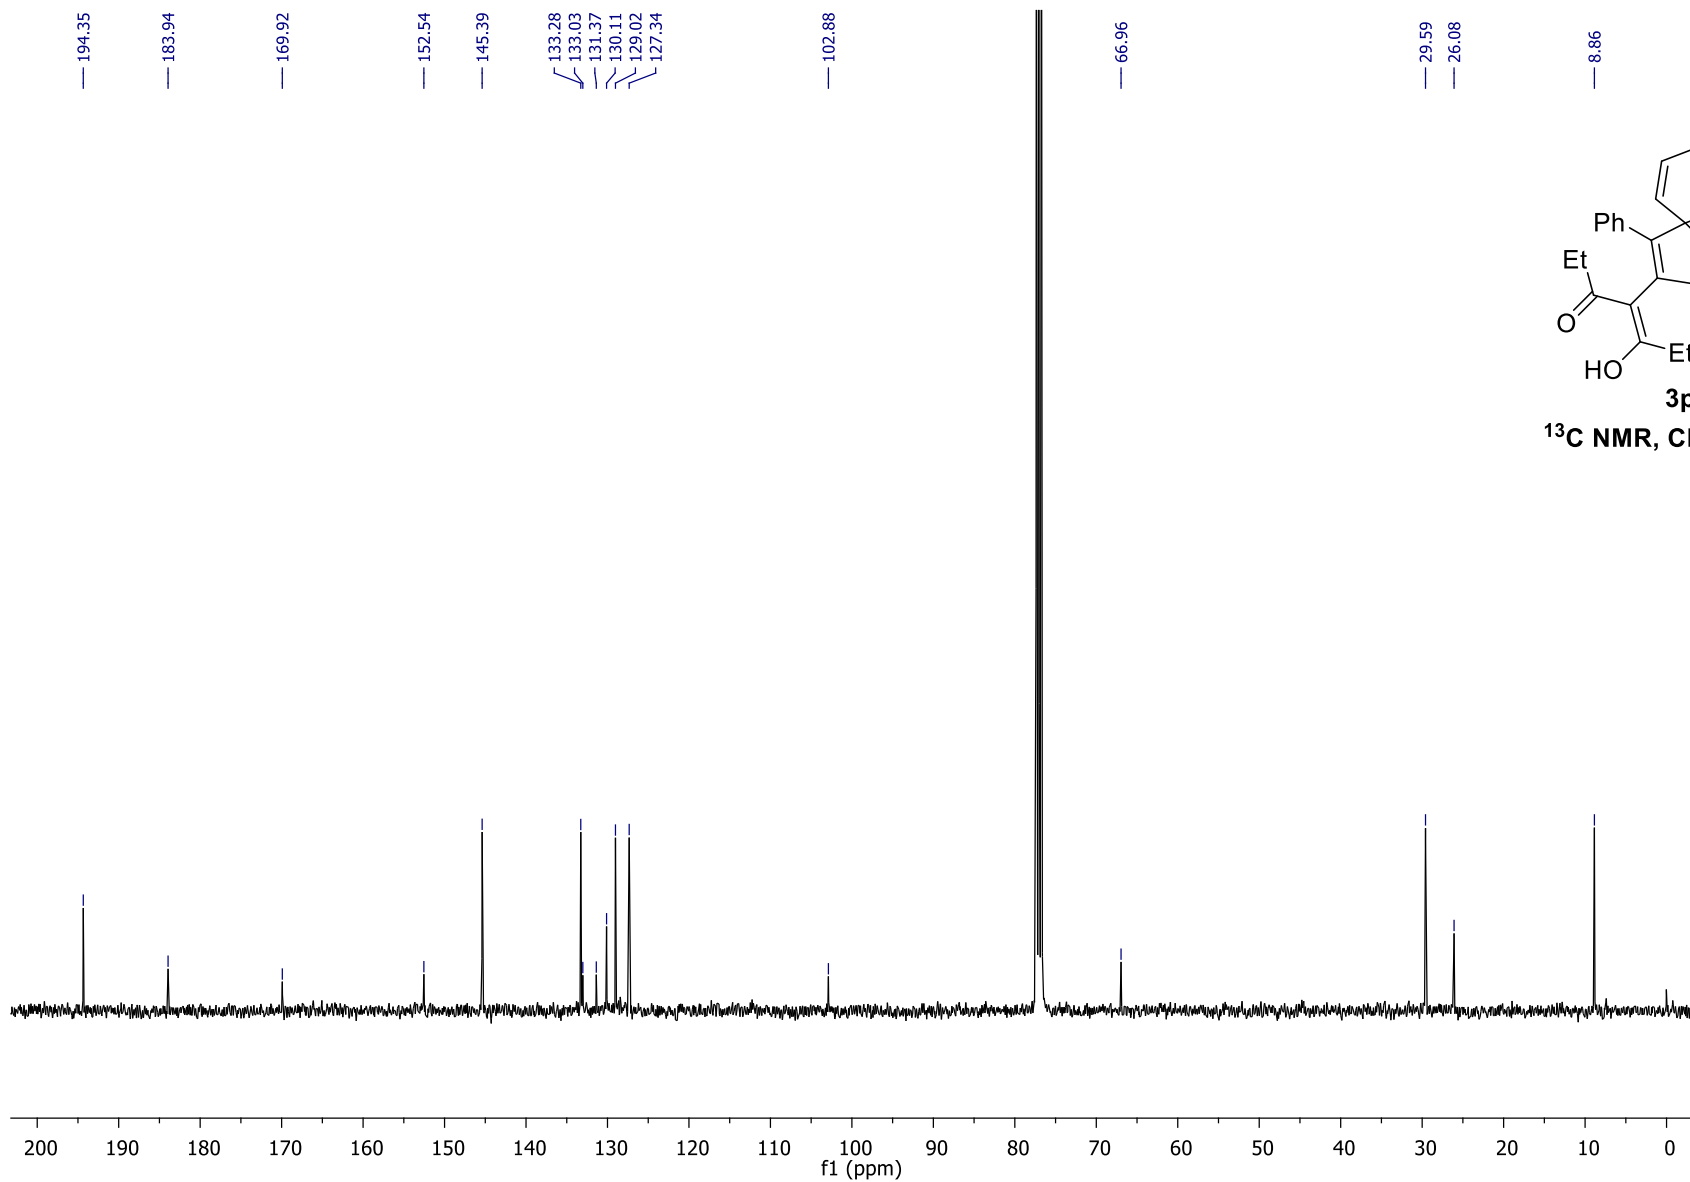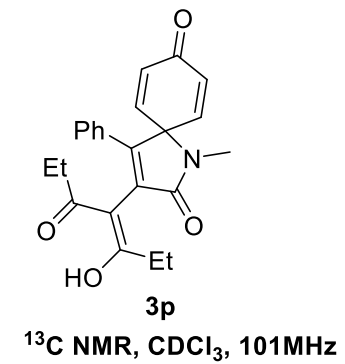

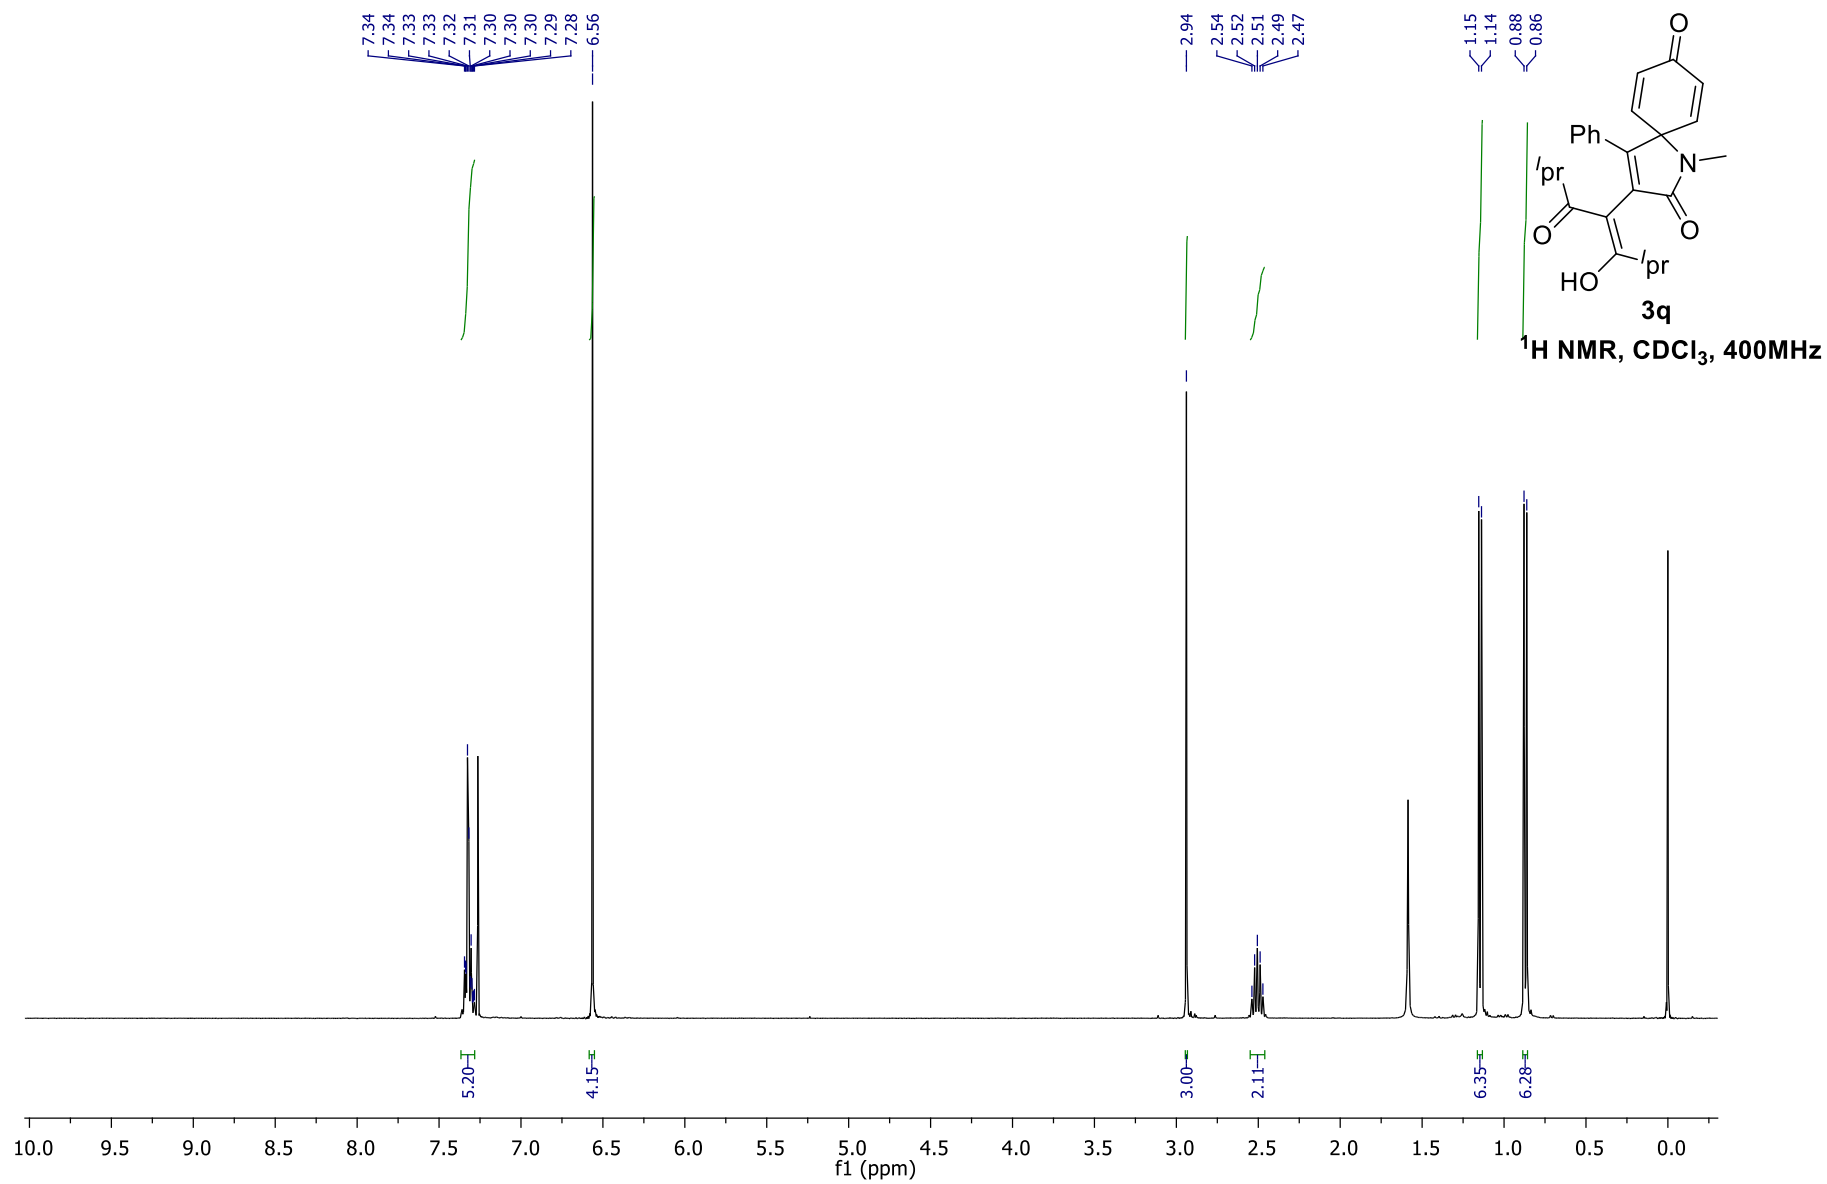

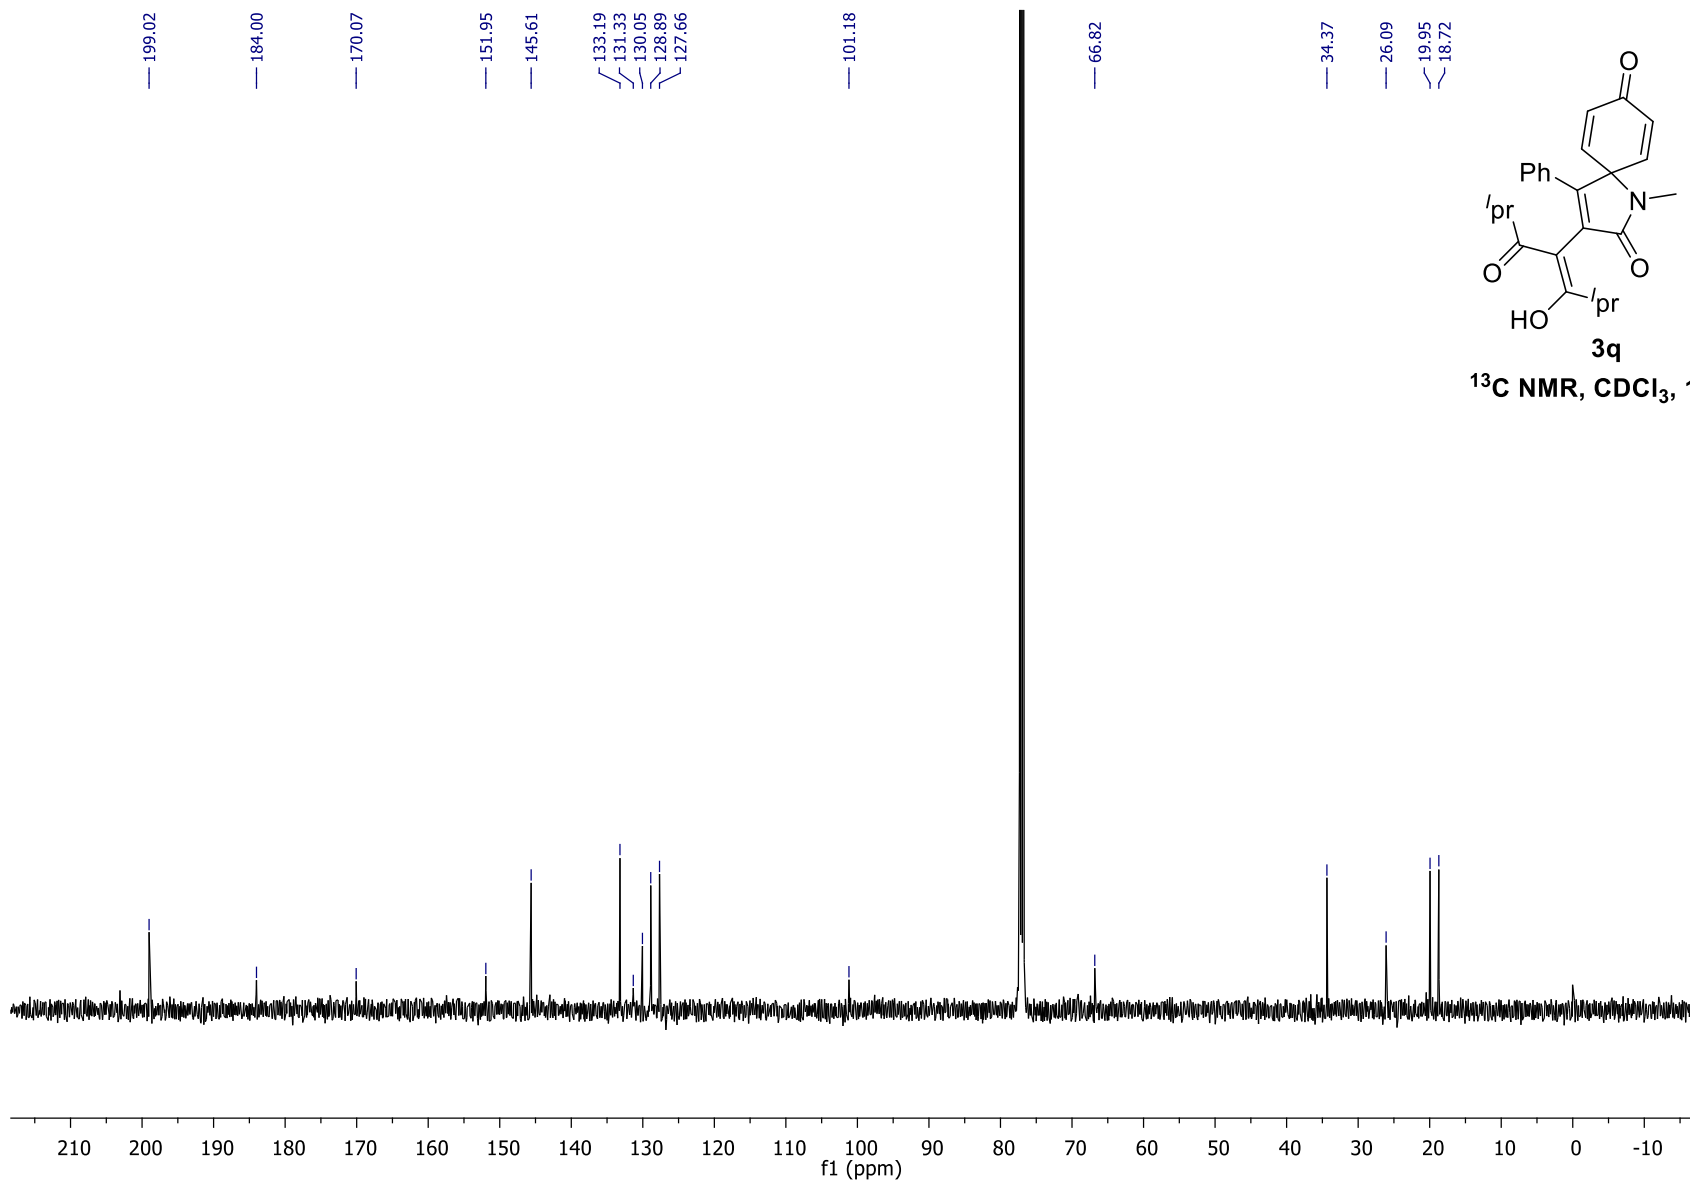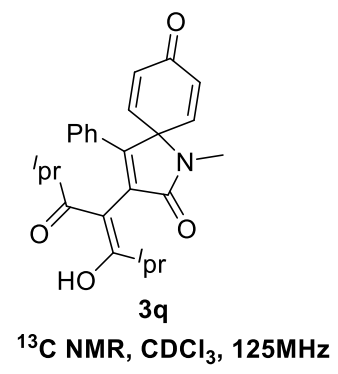

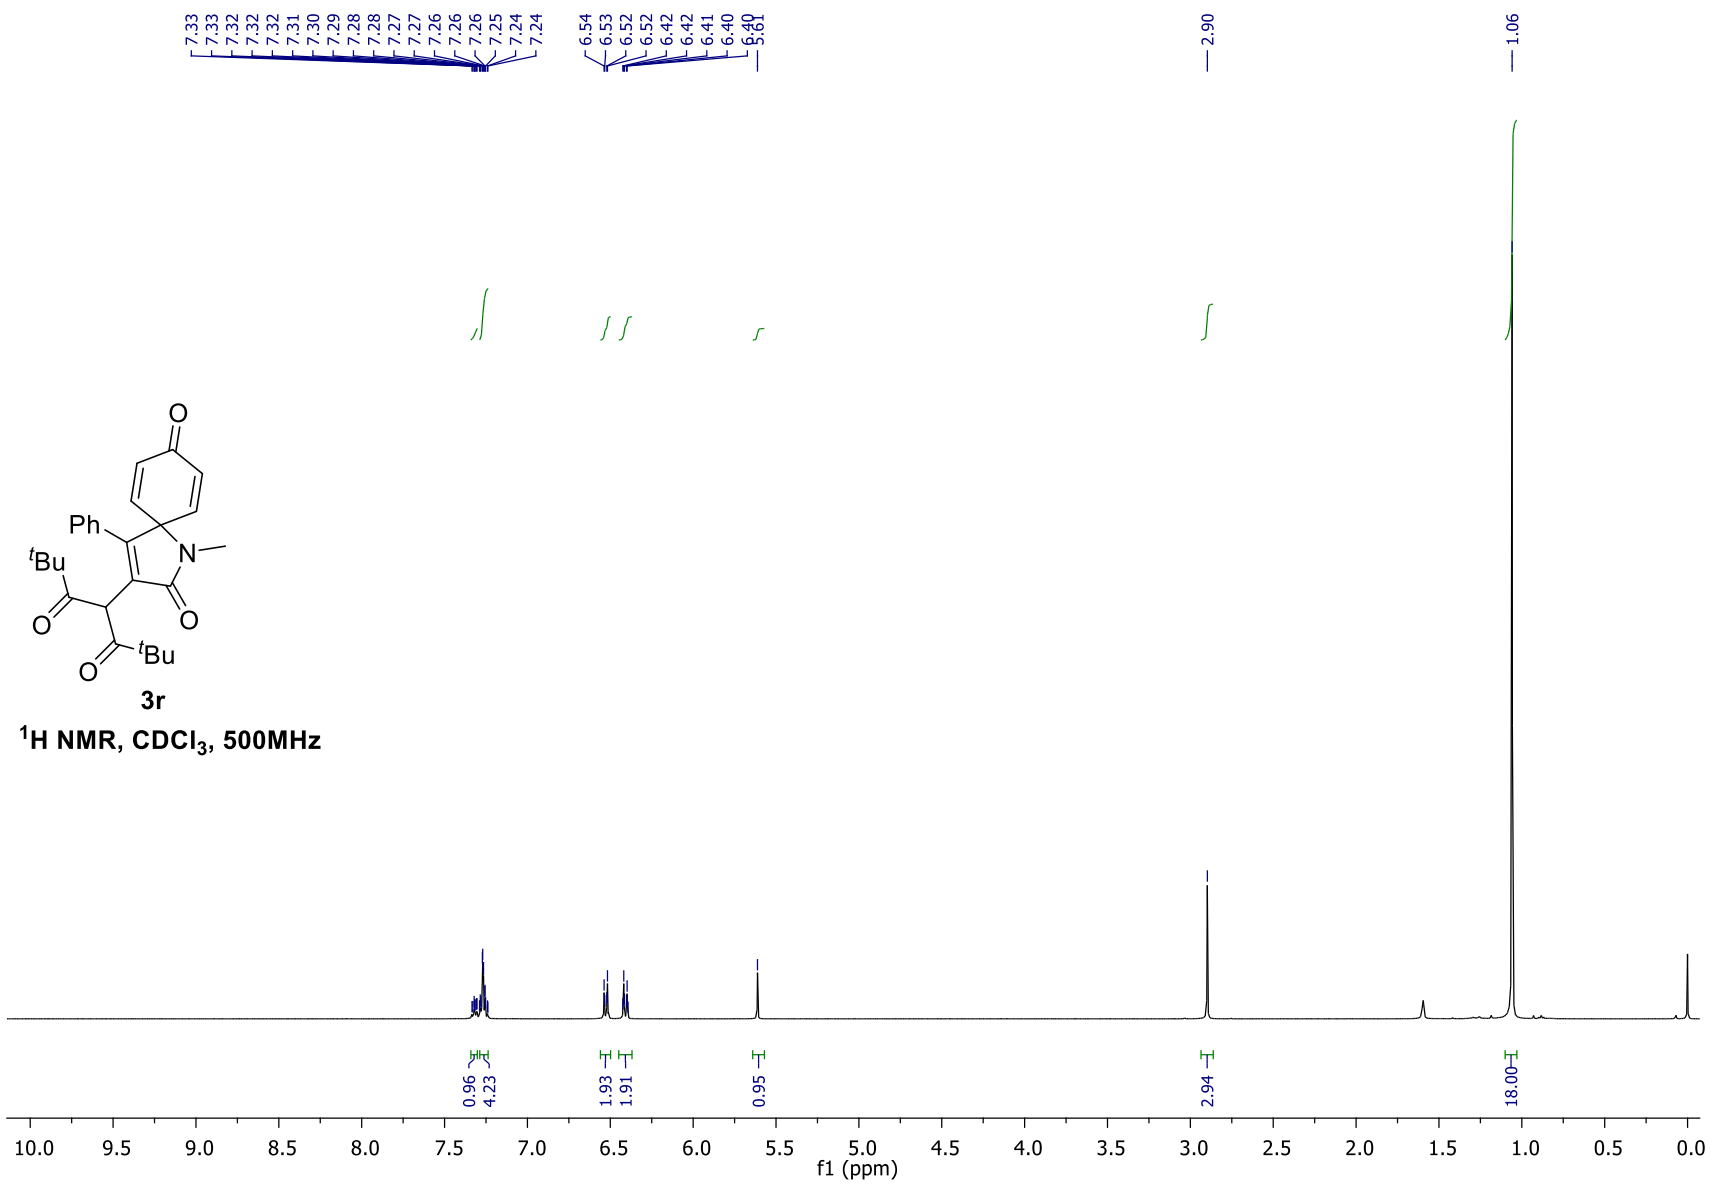

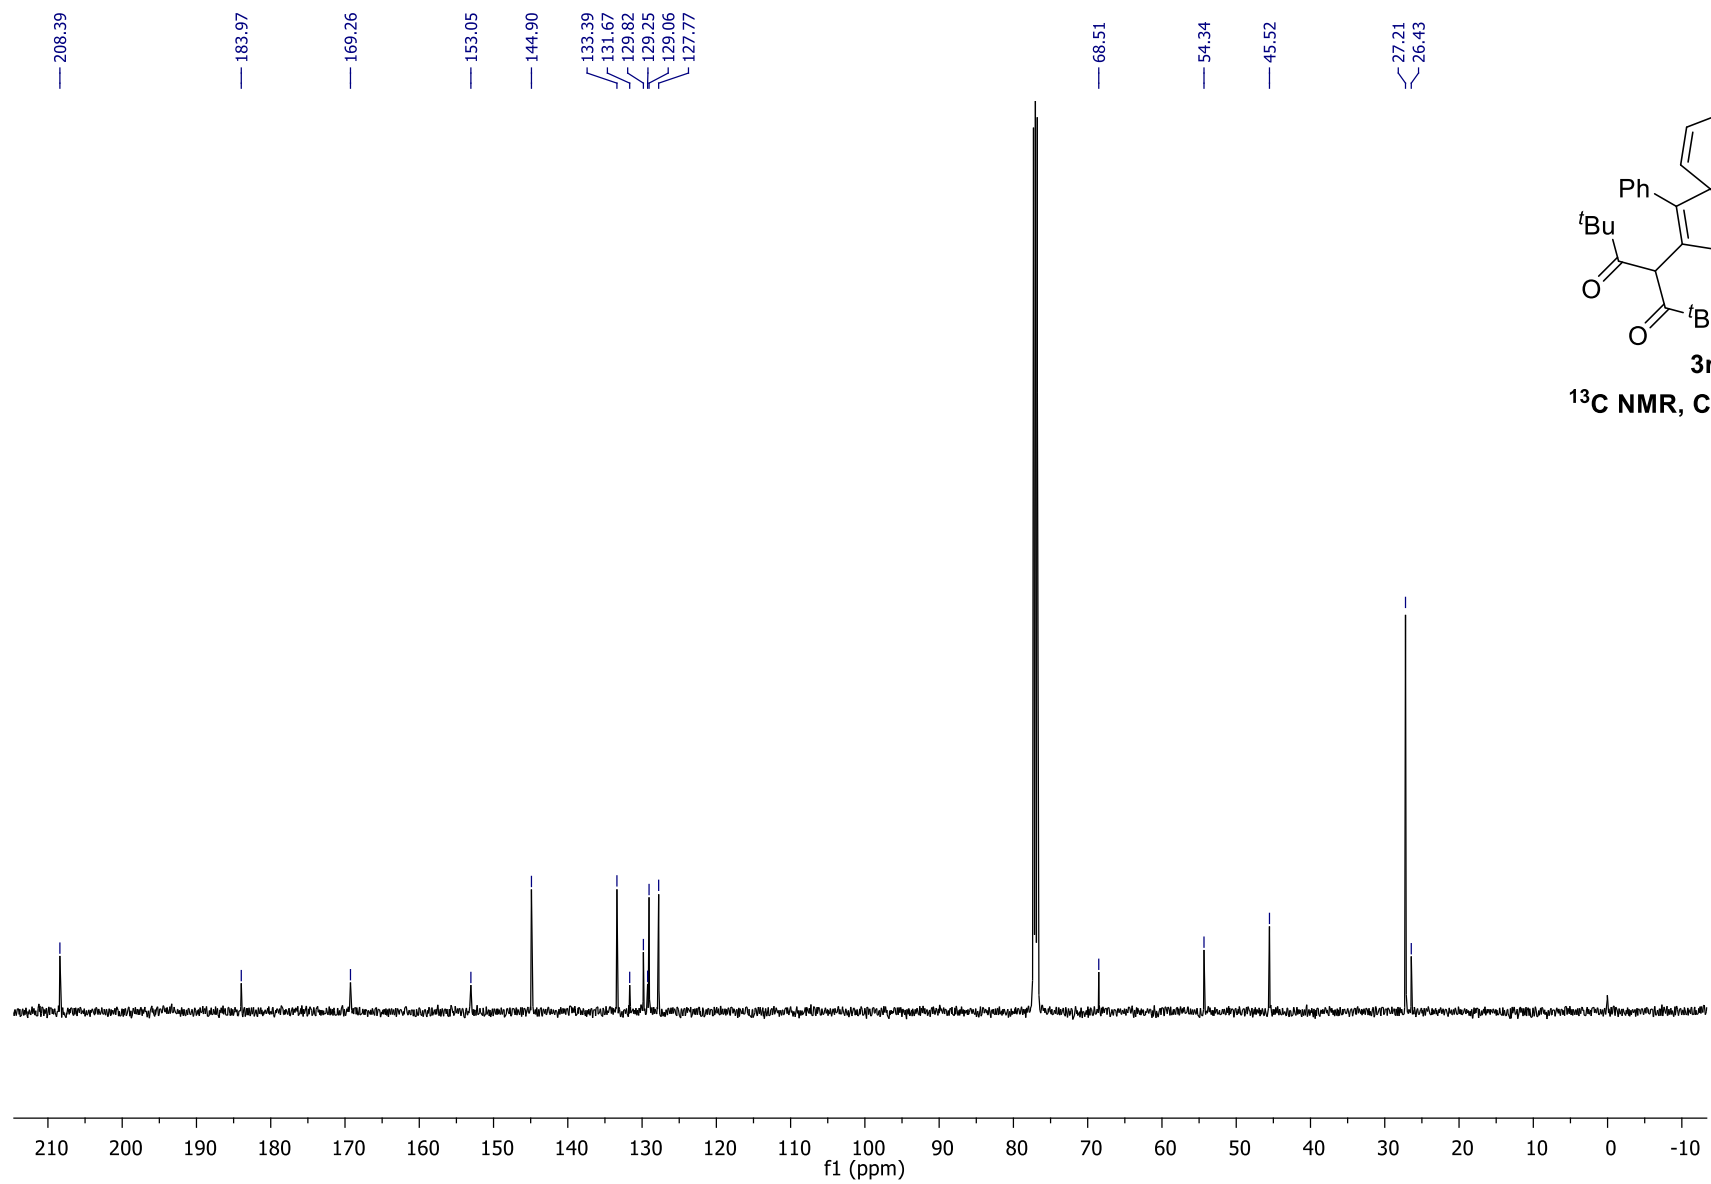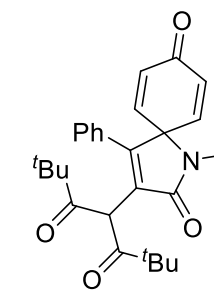

**3r**  
<sup>13</sup>C NMR, CDCl<sub>3</sub>, 101MHz

AJAY  
— 16.46

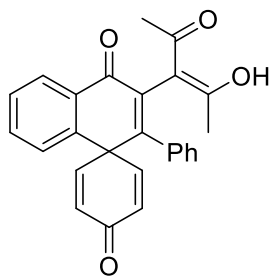

5a

<sup>1</sup>H NMR, CDCl<sub>3</sub>, 400MHz

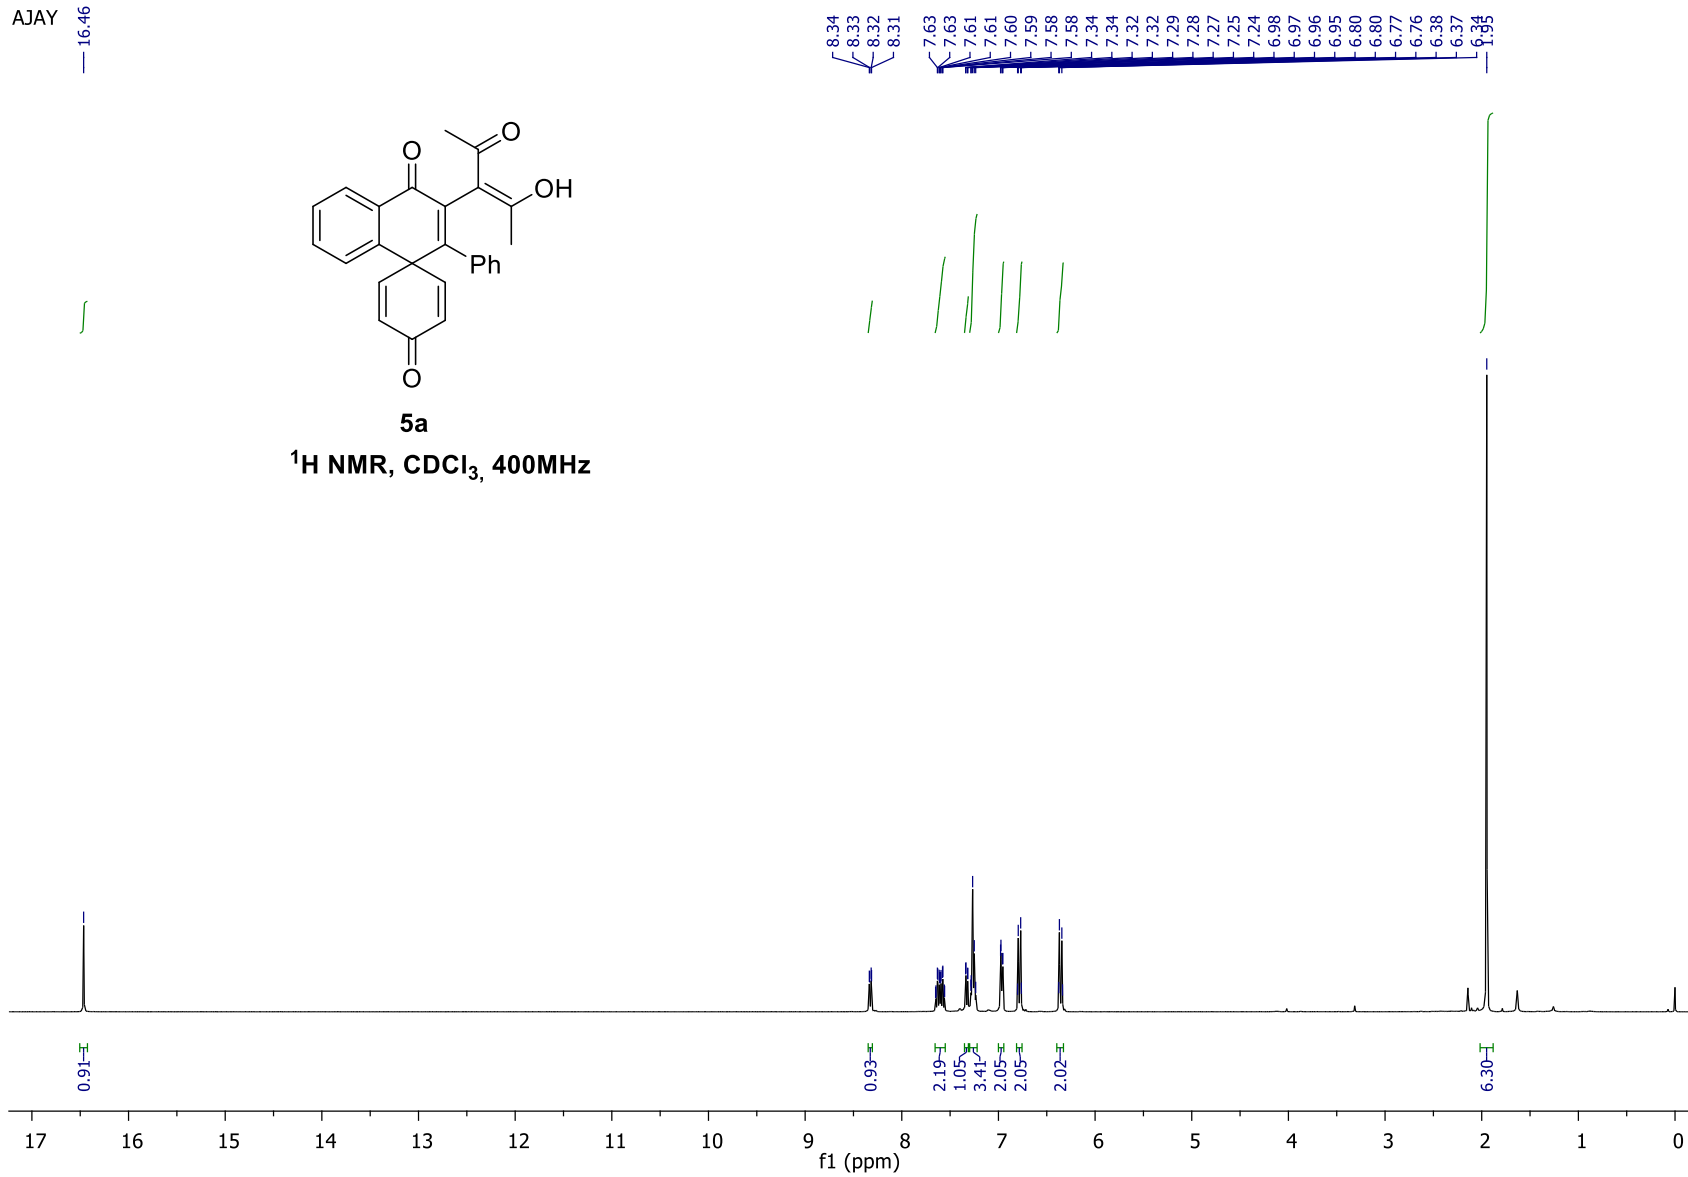

AJAY

— 190.07

— 184.55

— 183.31

— 155.92

— 148.40

— 138.15

— 136.71

— 136.50

— 133.70

— 130.39

— 129.20

— 128.88

— 128.27

— 128.23

— 128.10

— 126.36

— 107.95

— 51.19

— 23.77

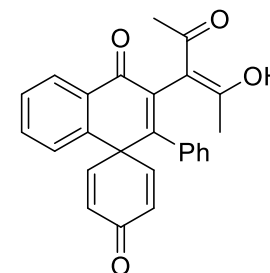

5a

<sup>13</sup>C NMR, CDCl<sub>3</sub>, 101MHz

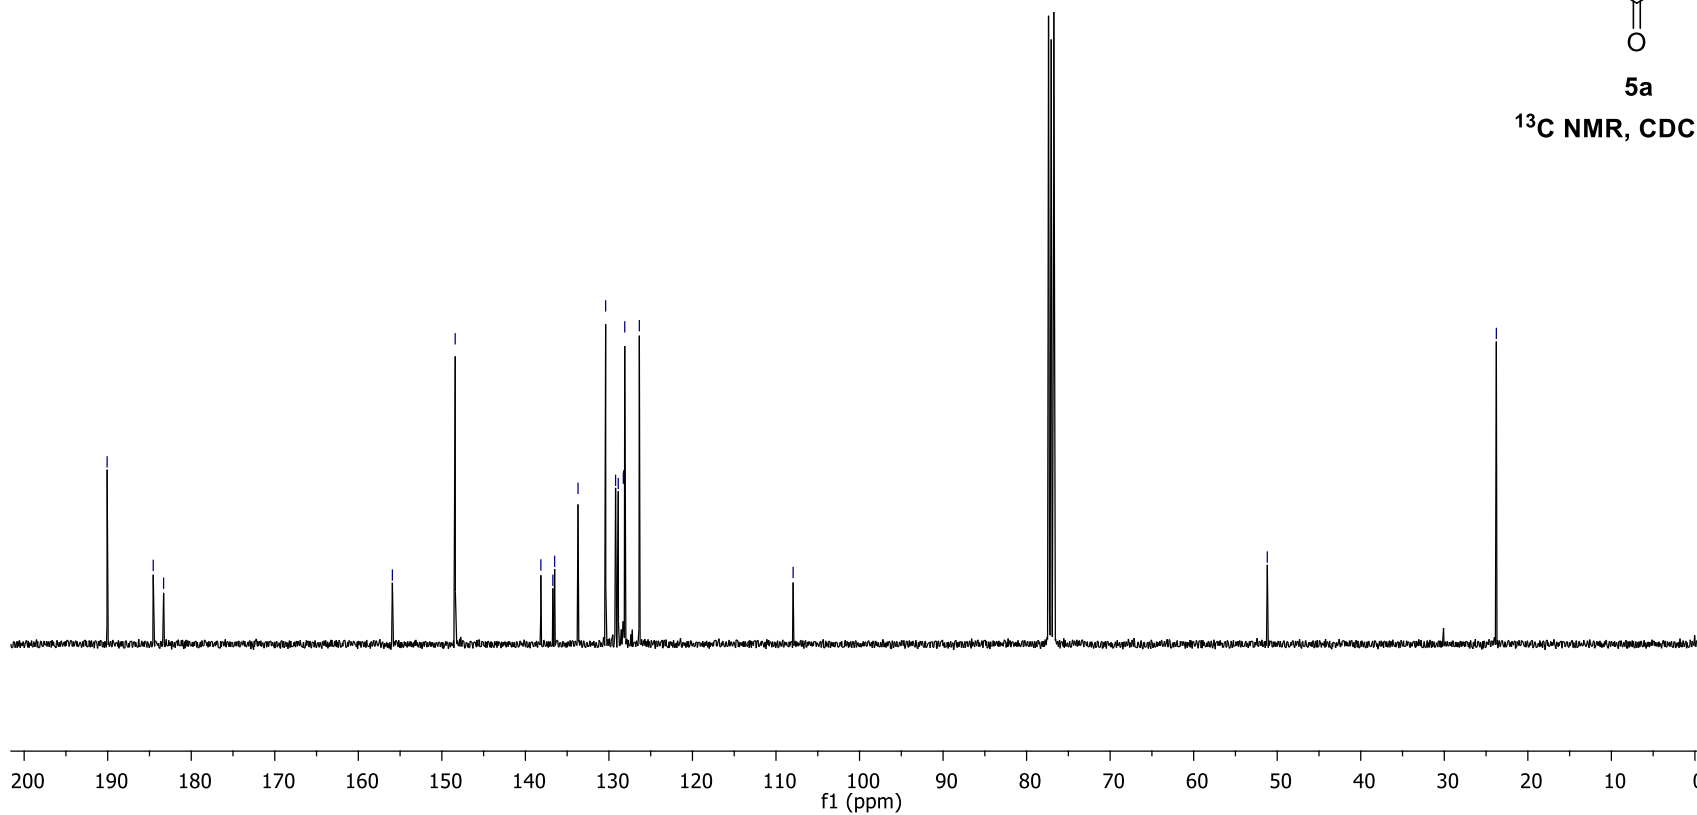



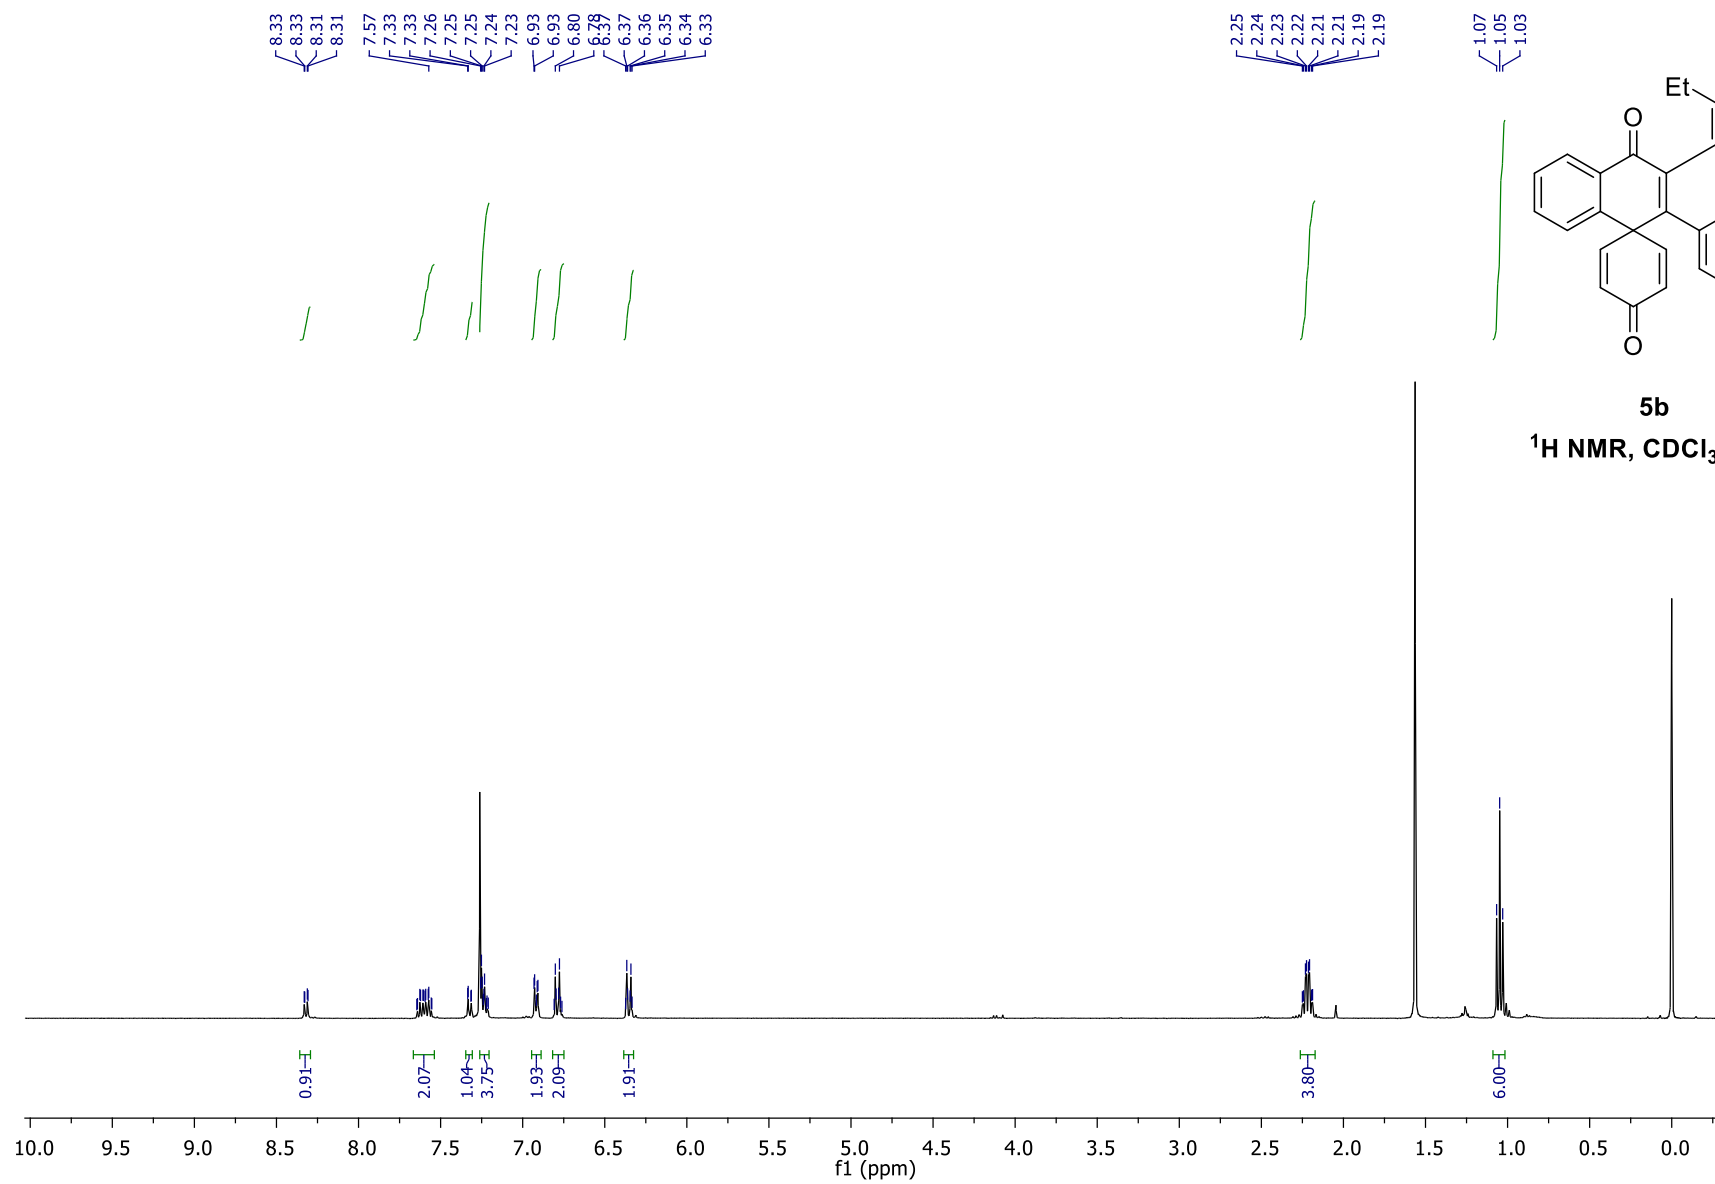

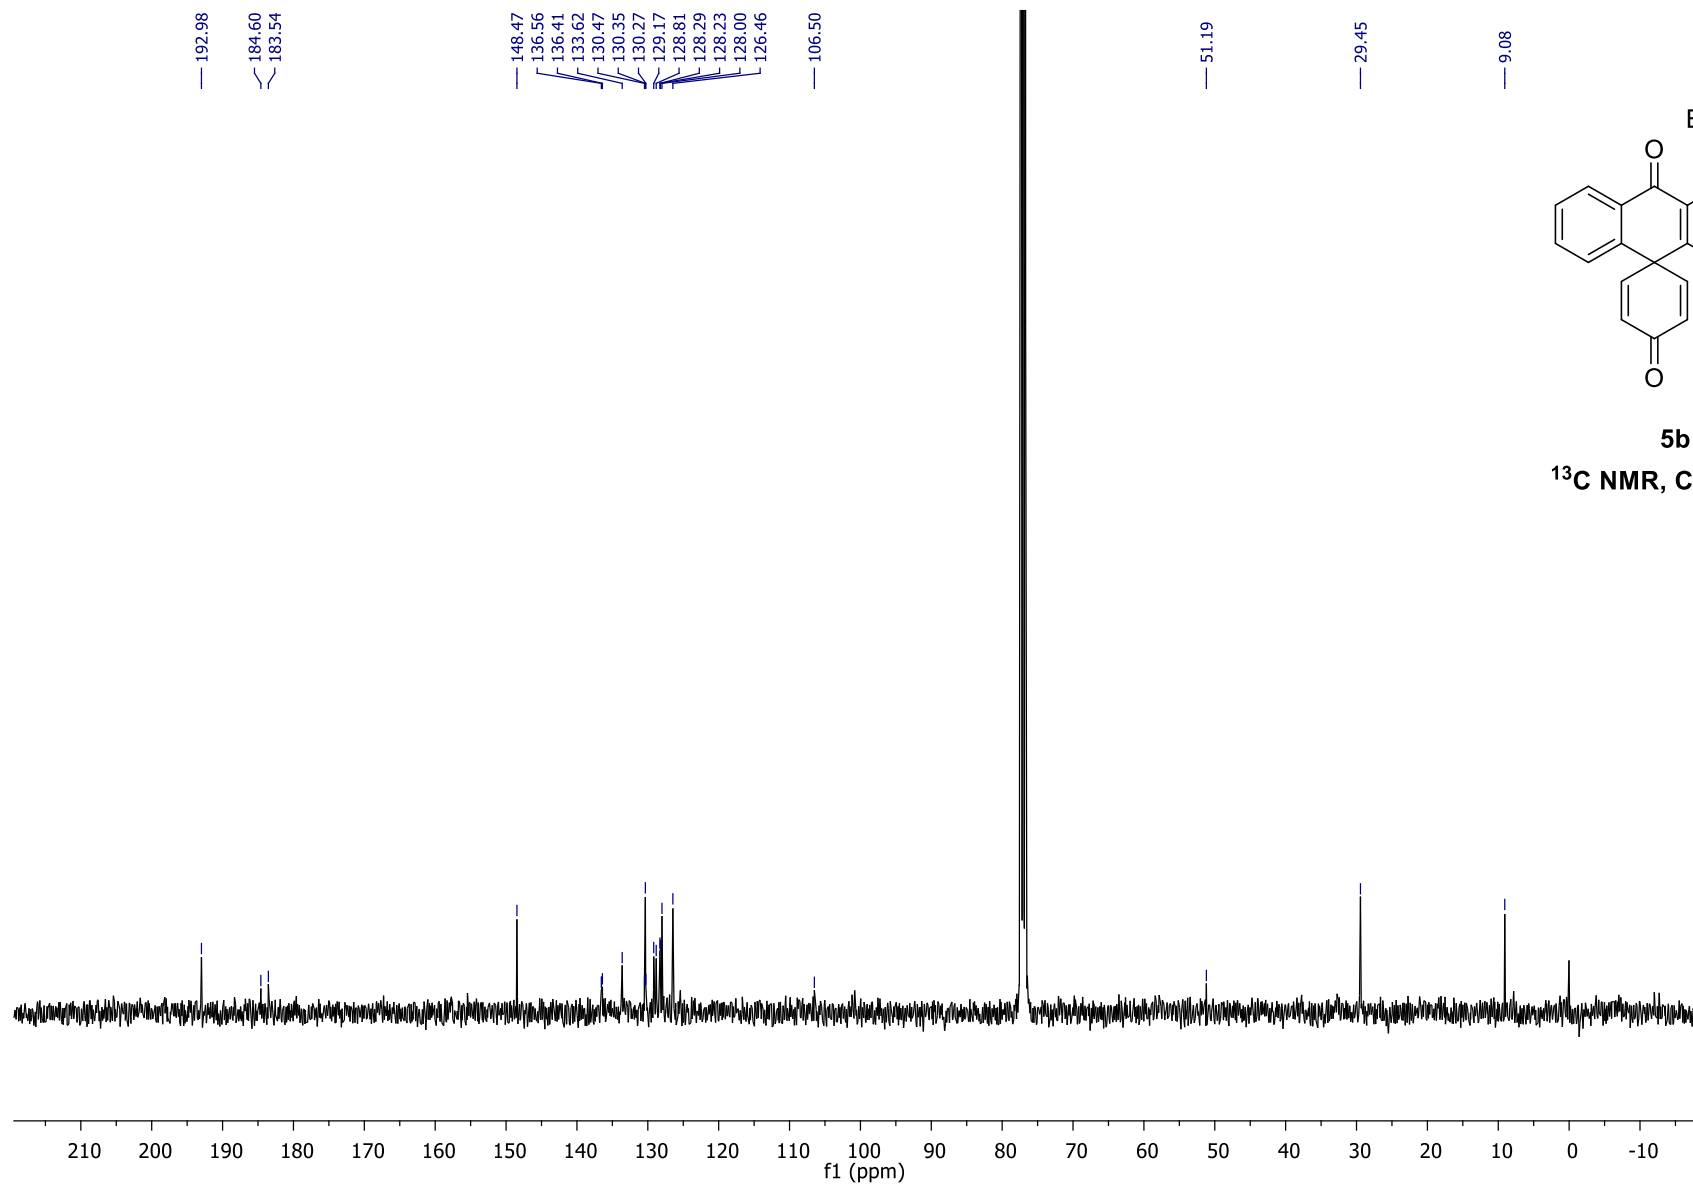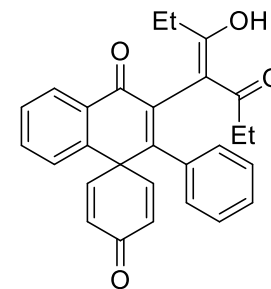

5b

<sup>13</sup>C NMR, CDCl<sub>3</sub>, 101MHz

CRR

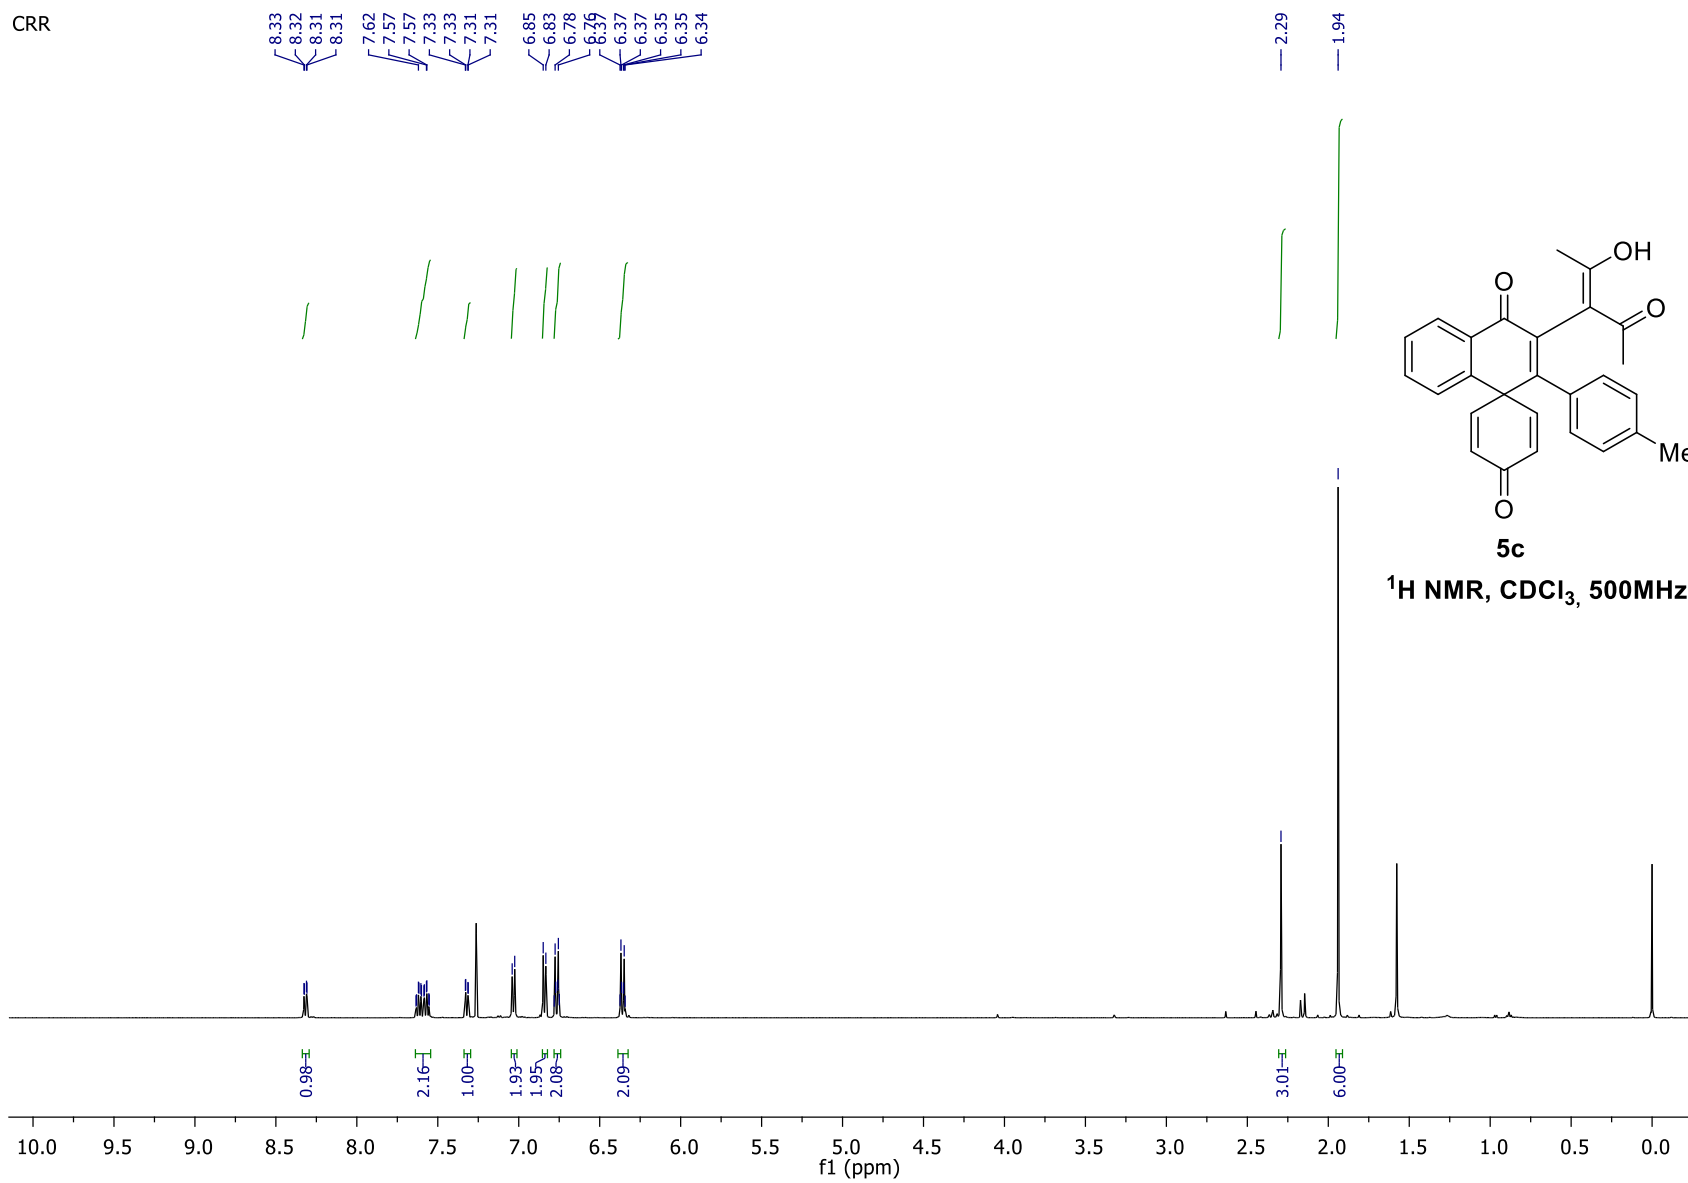

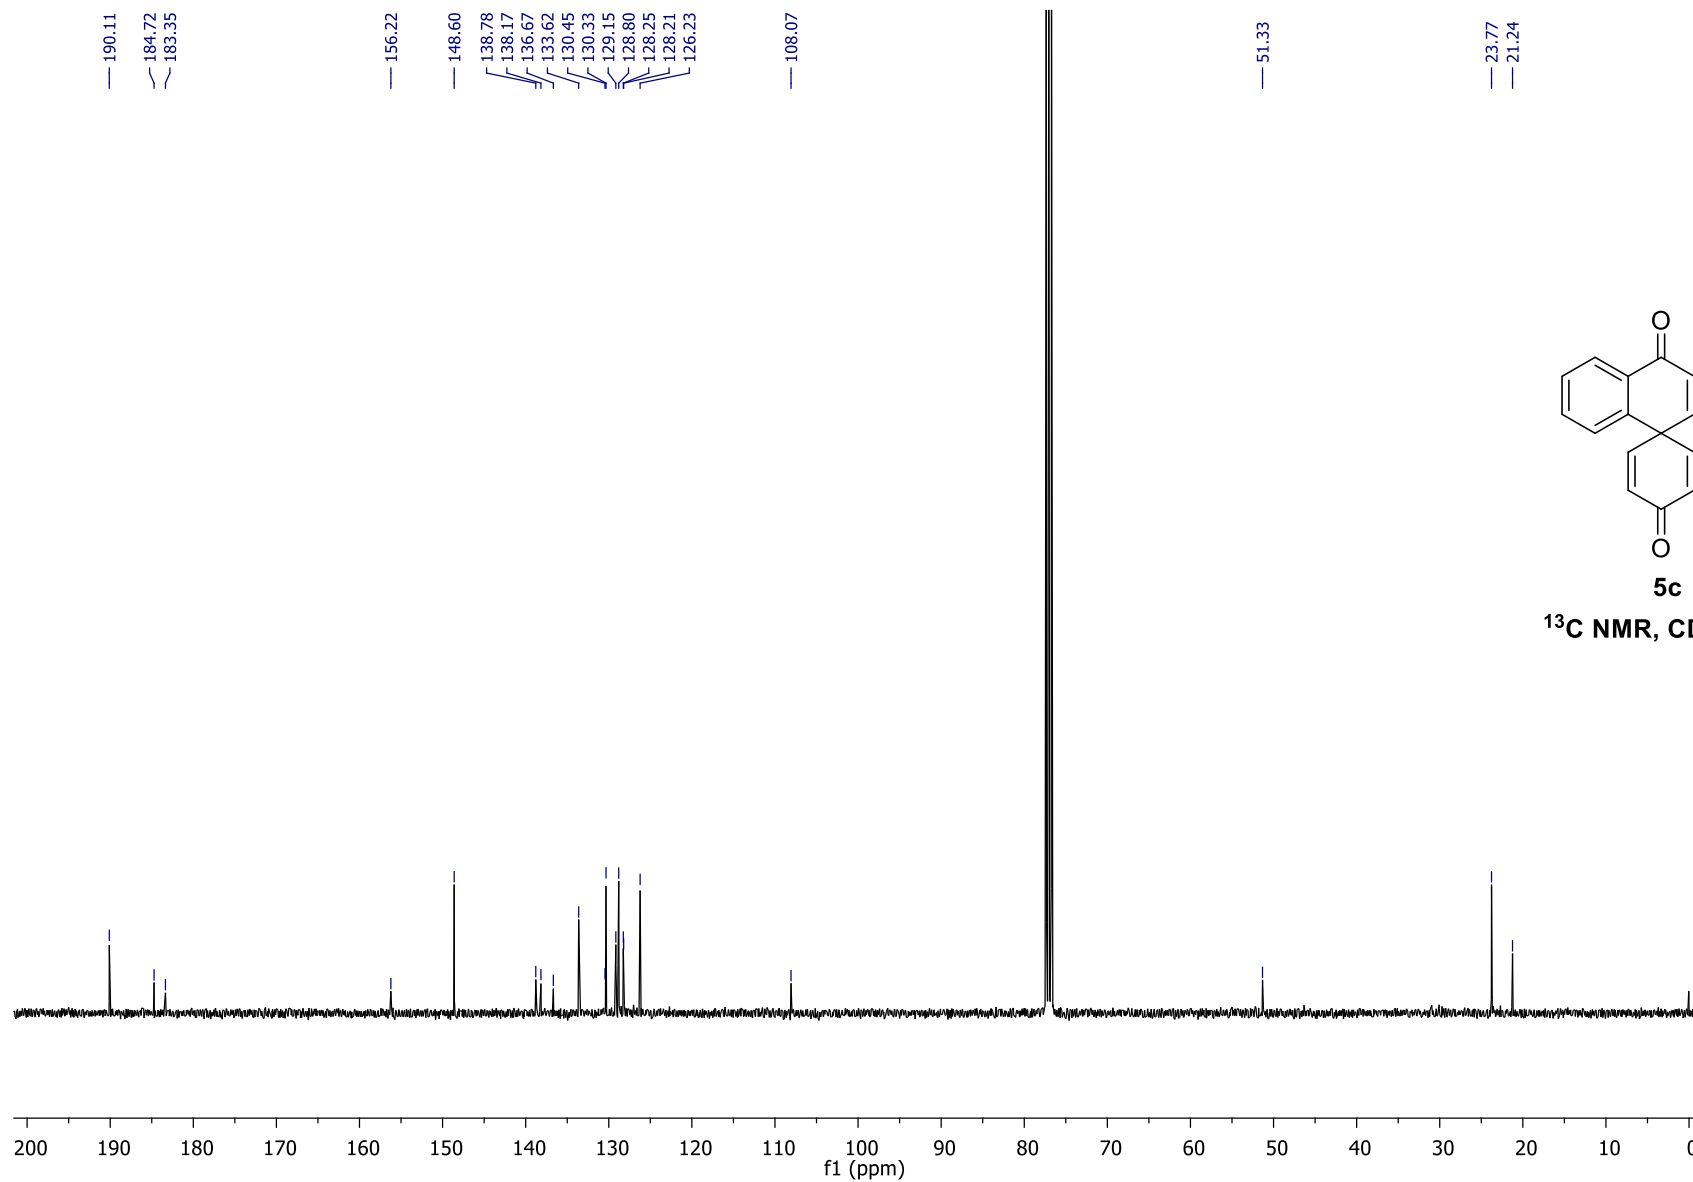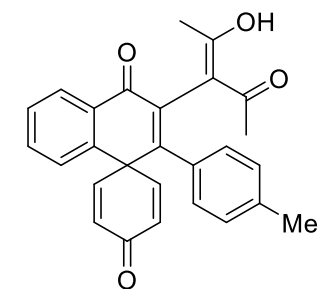

5c

<sup>13</sup>C NMR, CDCl<sub>3</sub>, 101MHz

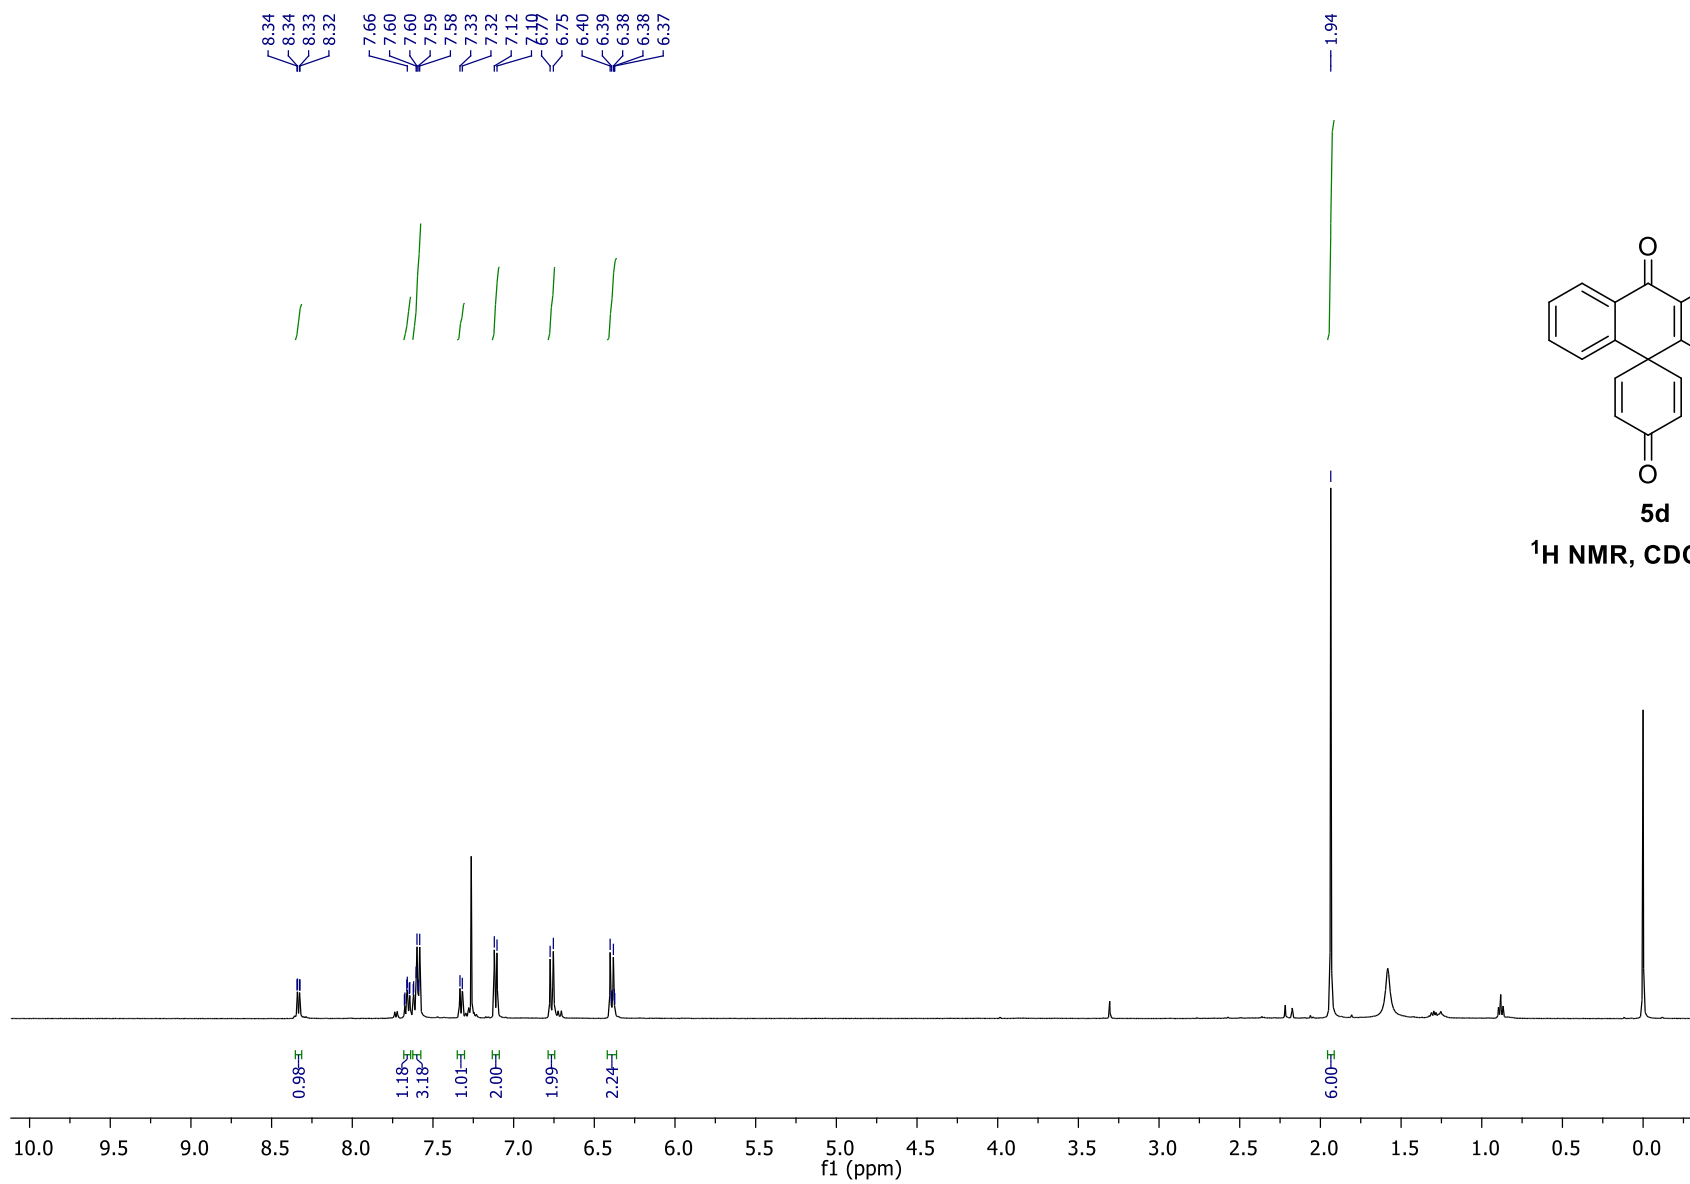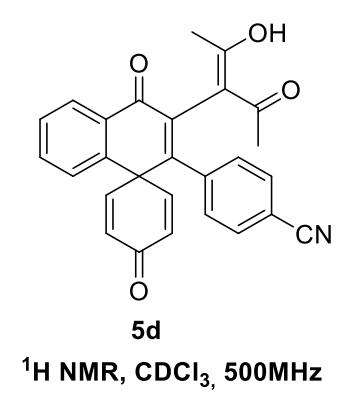

AJAY  
OSPC188

183.94

183.91  
182.75

153.47

147.62

140.96

137.75

137.31

134.09

132.00

130.83

130.09

129.53

128.45

128.24

127.49

117.72

113.09

107.42

50.68

23.78

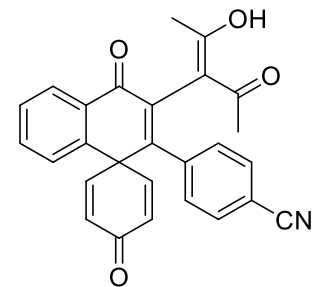

5d

<sup>13</sup>C NMR, CDCl<sub>3</sub>, 101MHz

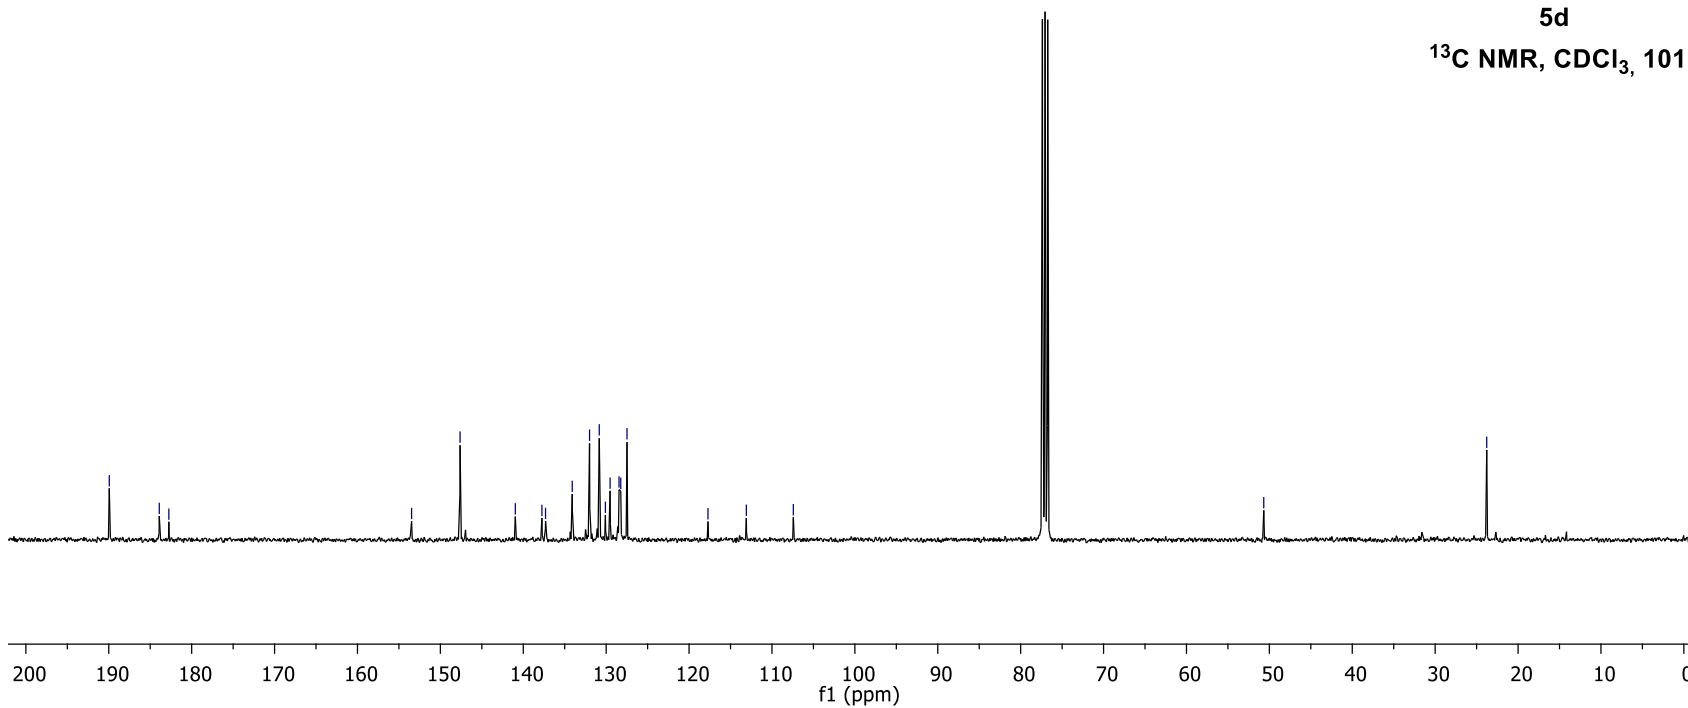

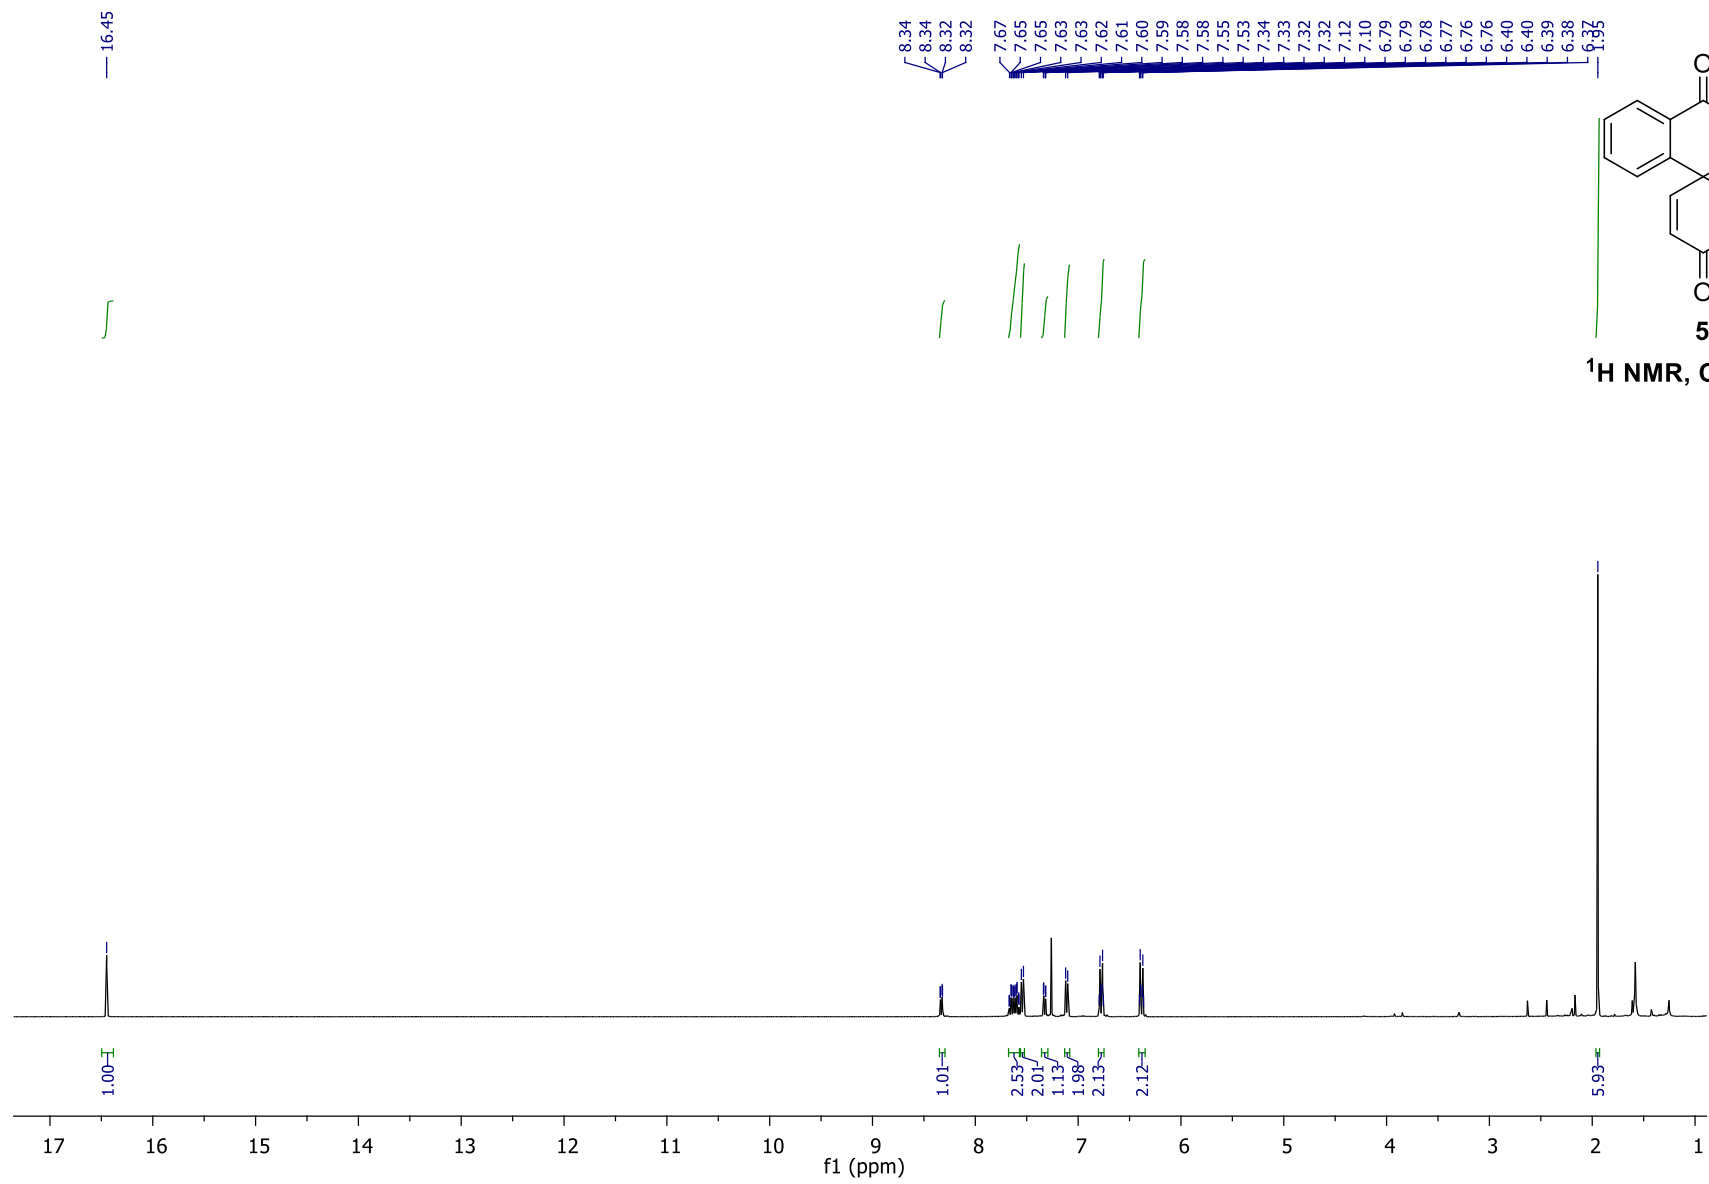

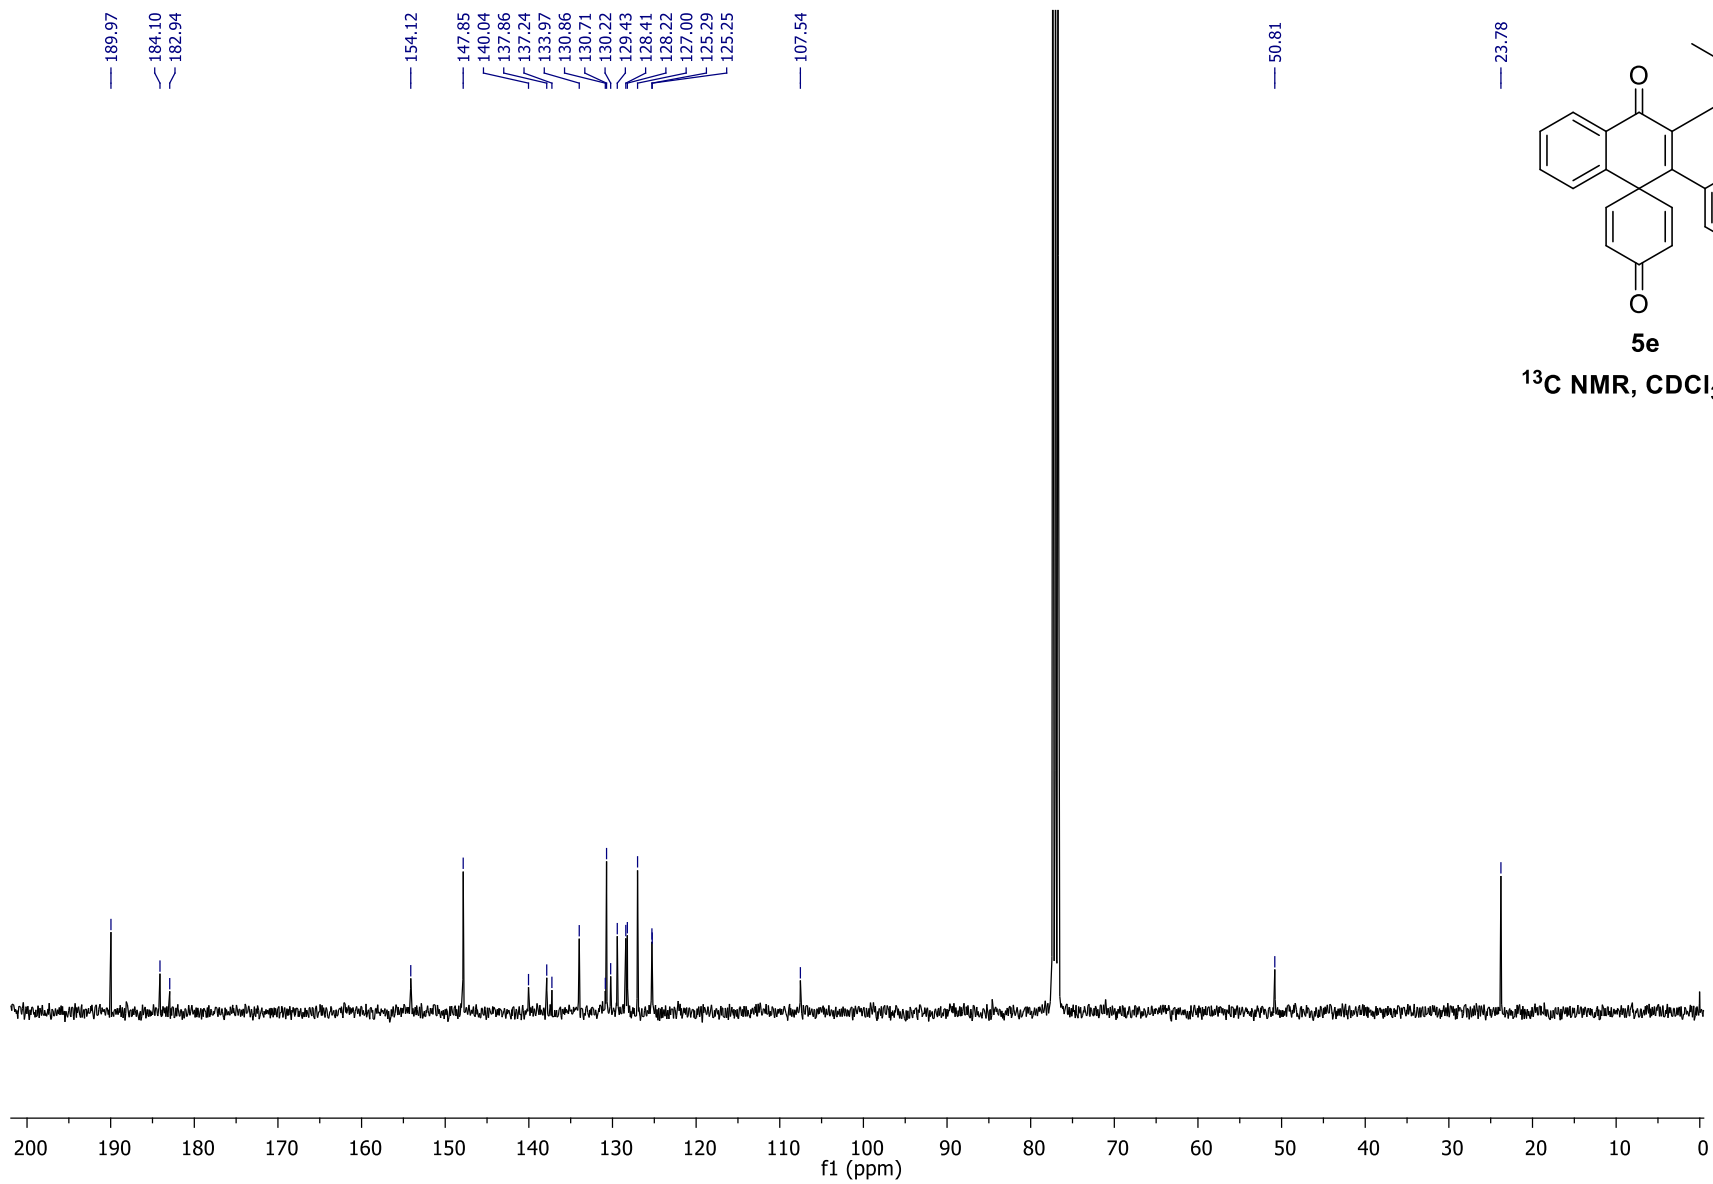



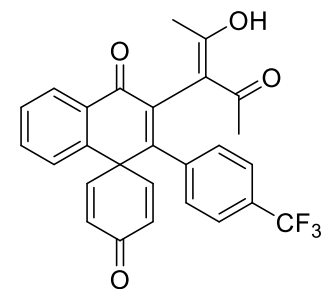

**5e**

**<sup>19</sup>F NMR, CDCl<sub>3</sub>, 376MHz**

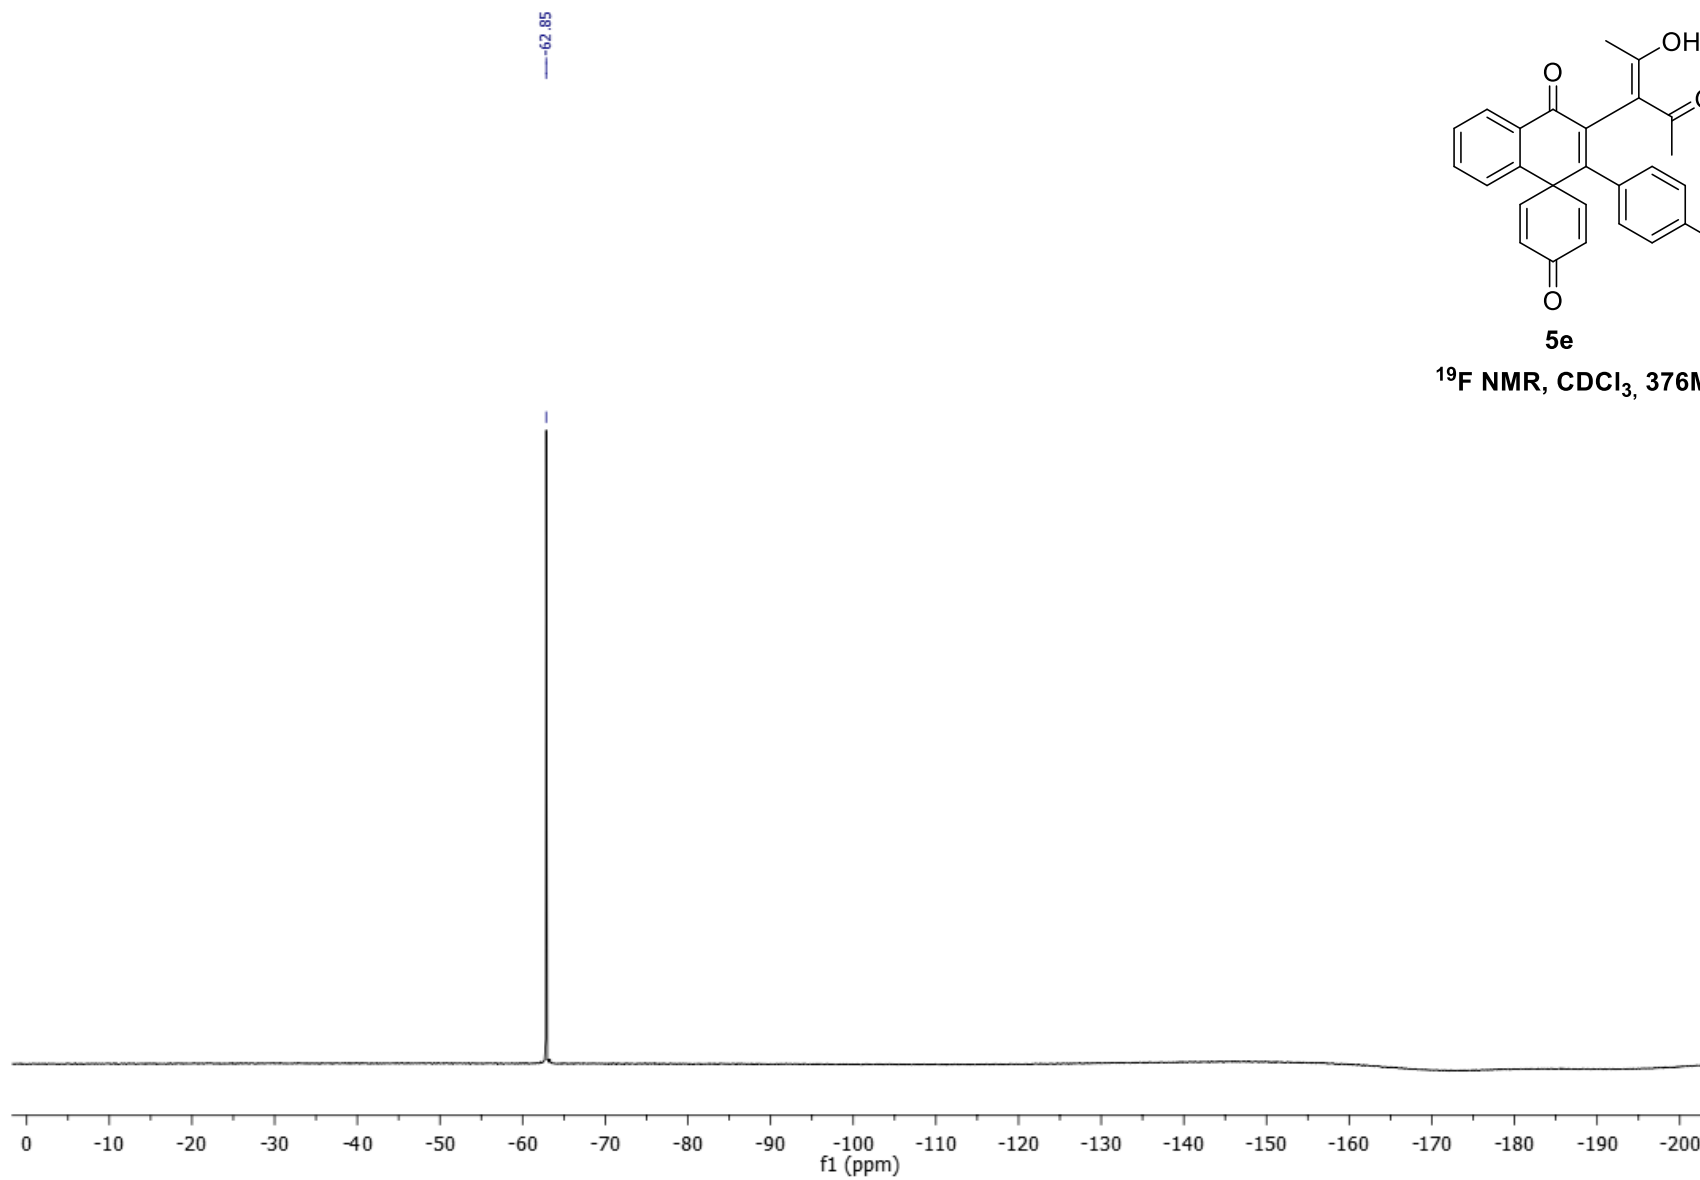

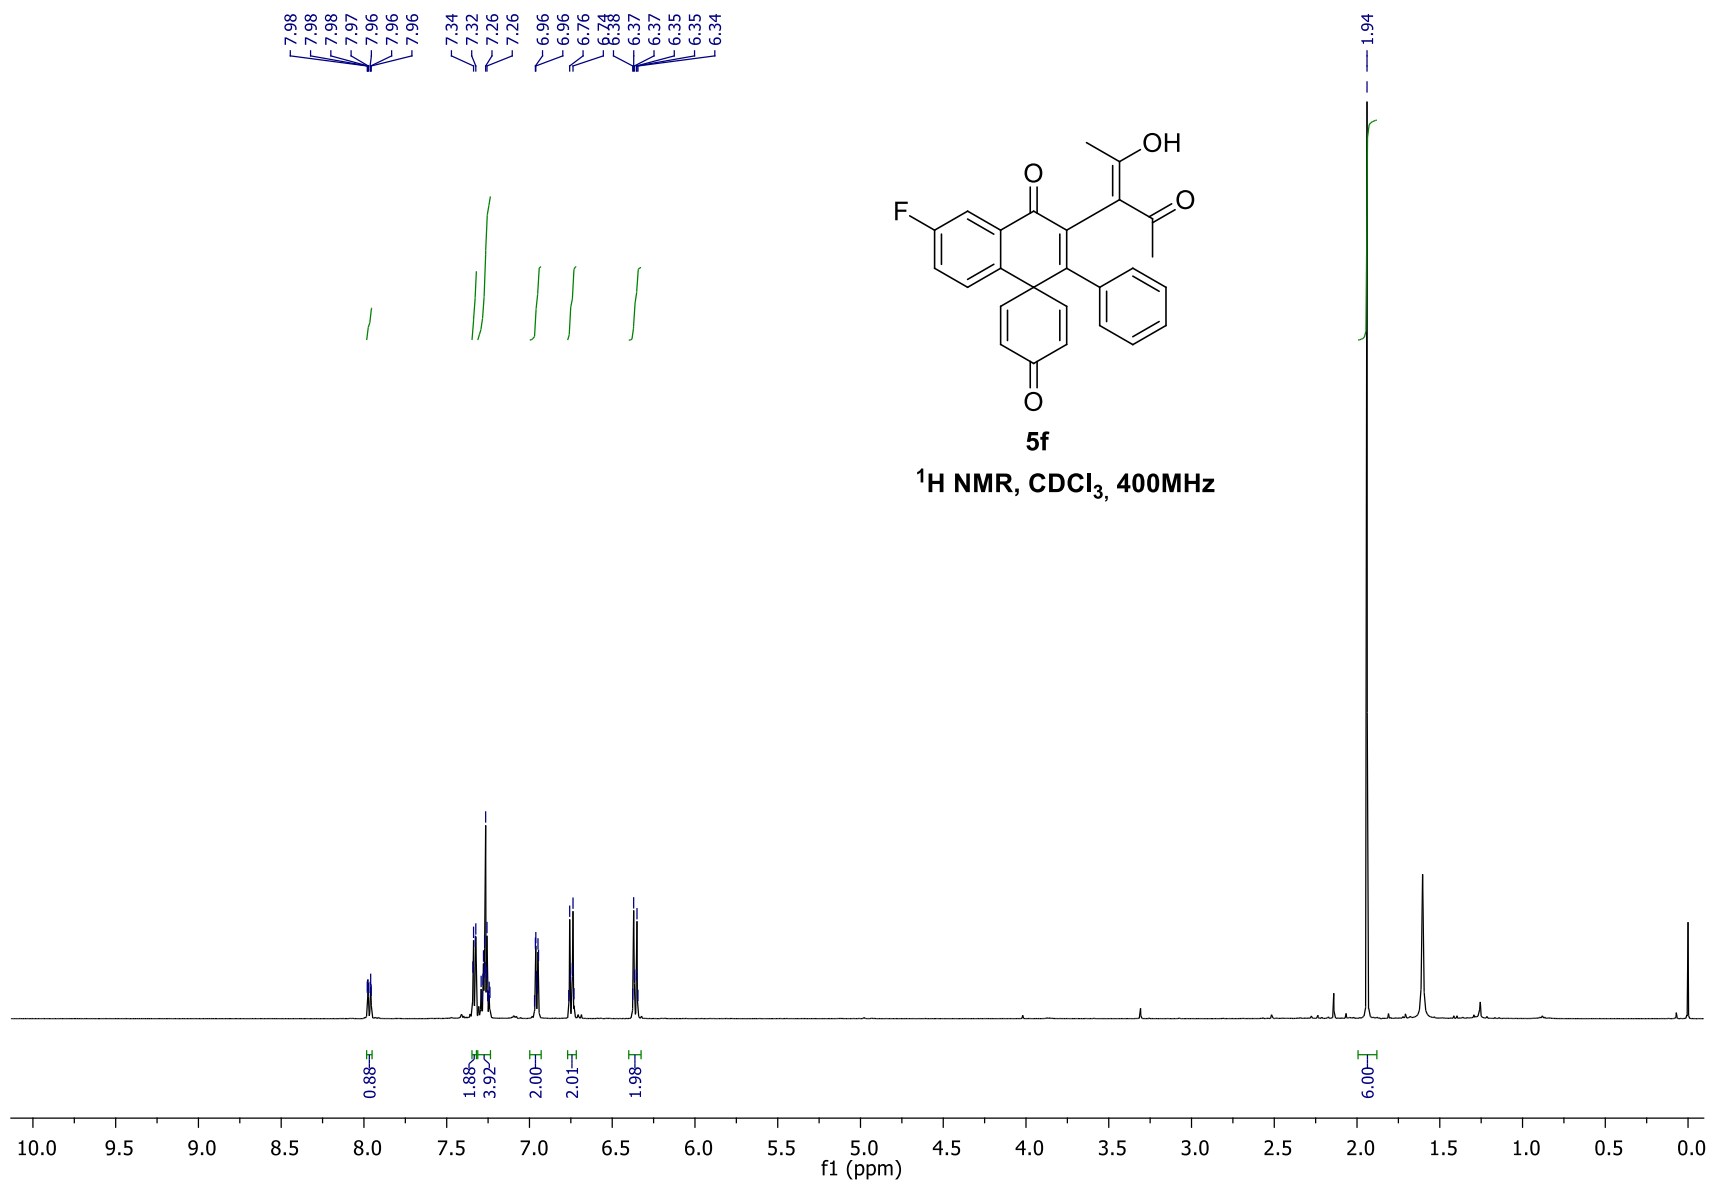

PNR

190.05  
184.29  
182.42  
  
164.14  
161.64  
156.43  
  
148.00  
136.53  
136.25  
133.96  
132.51  
130.80  
130.72  
130.51  
129.03  
128.15  
126.30  
121.59  
114.78  
114.06  
107.71

50.85

23.75

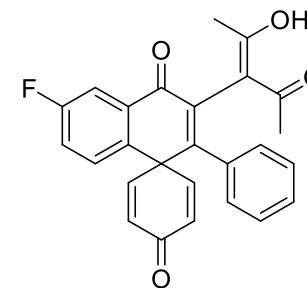

5f

<sup>13</sup>C NMR, CDCl<sub>3</sub>, 101MHz

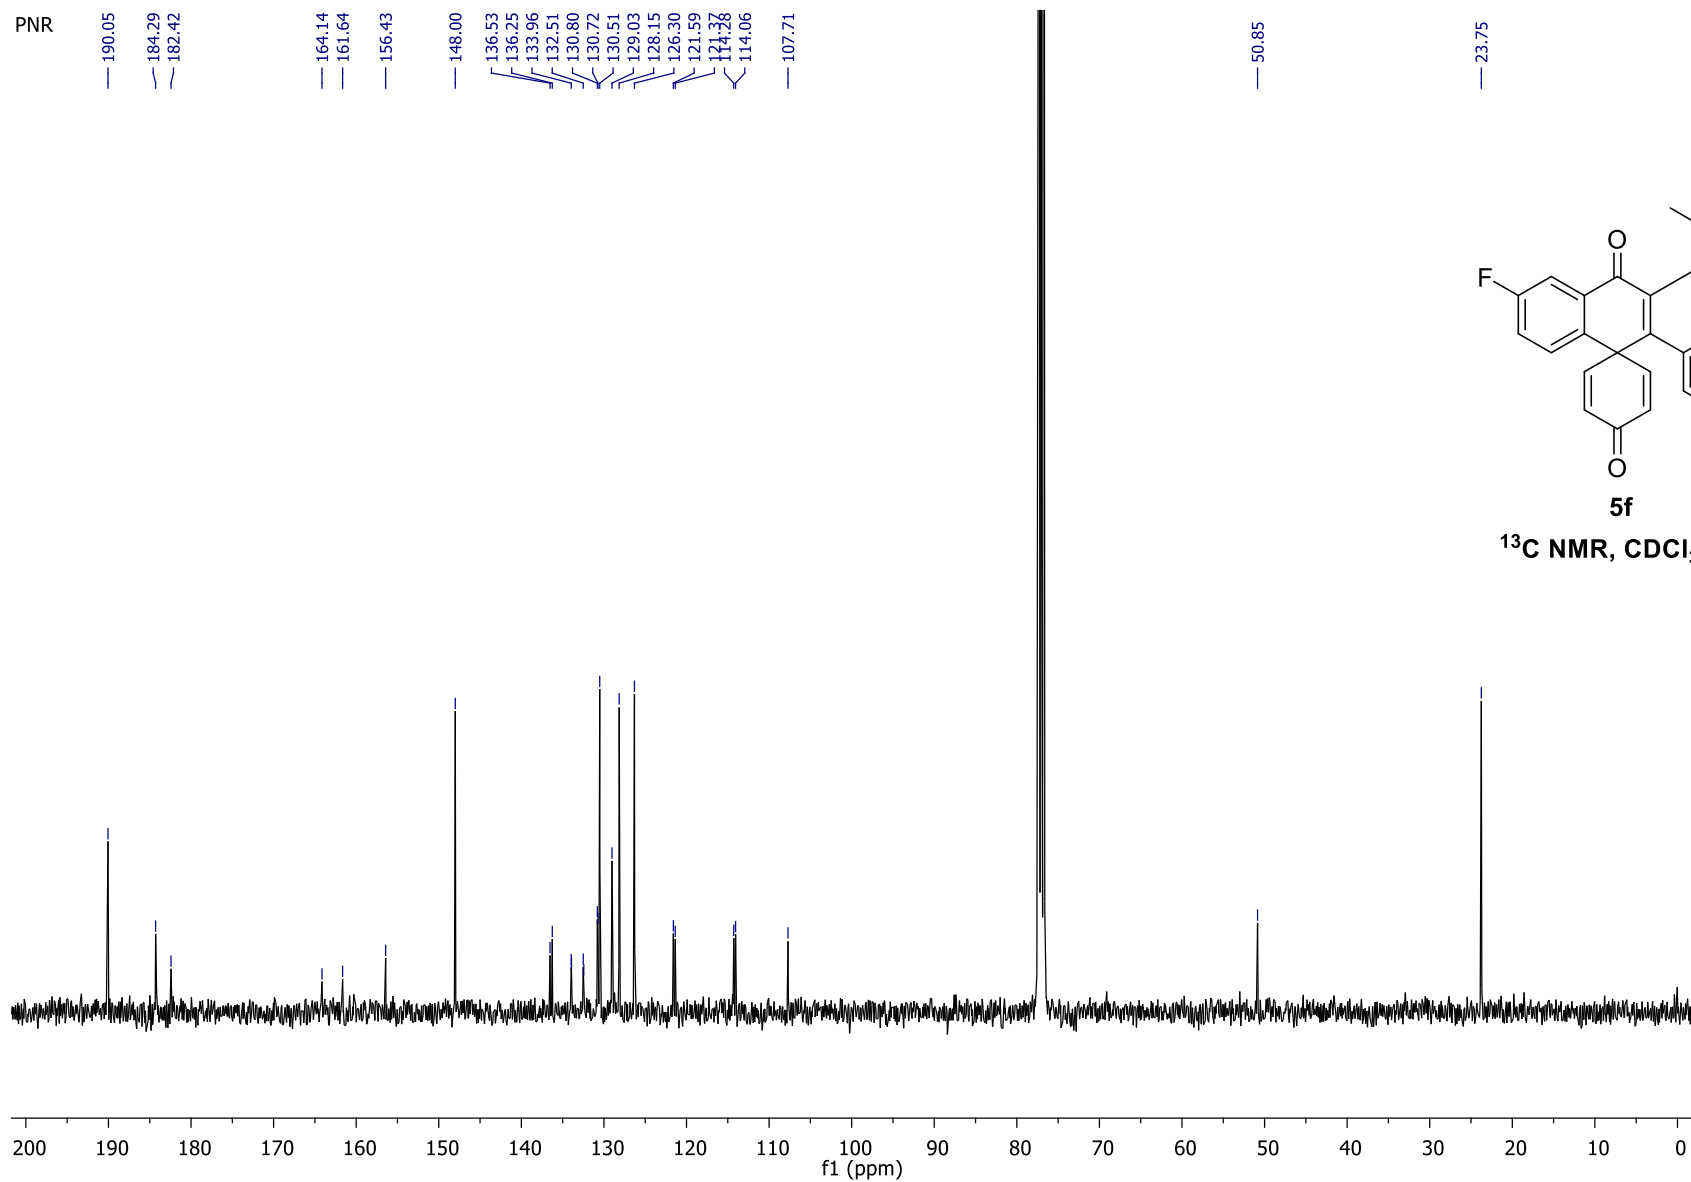

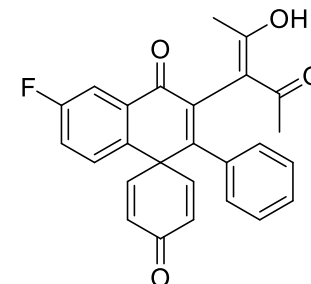

**5f**

**<sup>19</sup>F NMR, CDCl<sub>3</sub>, 377MHz**

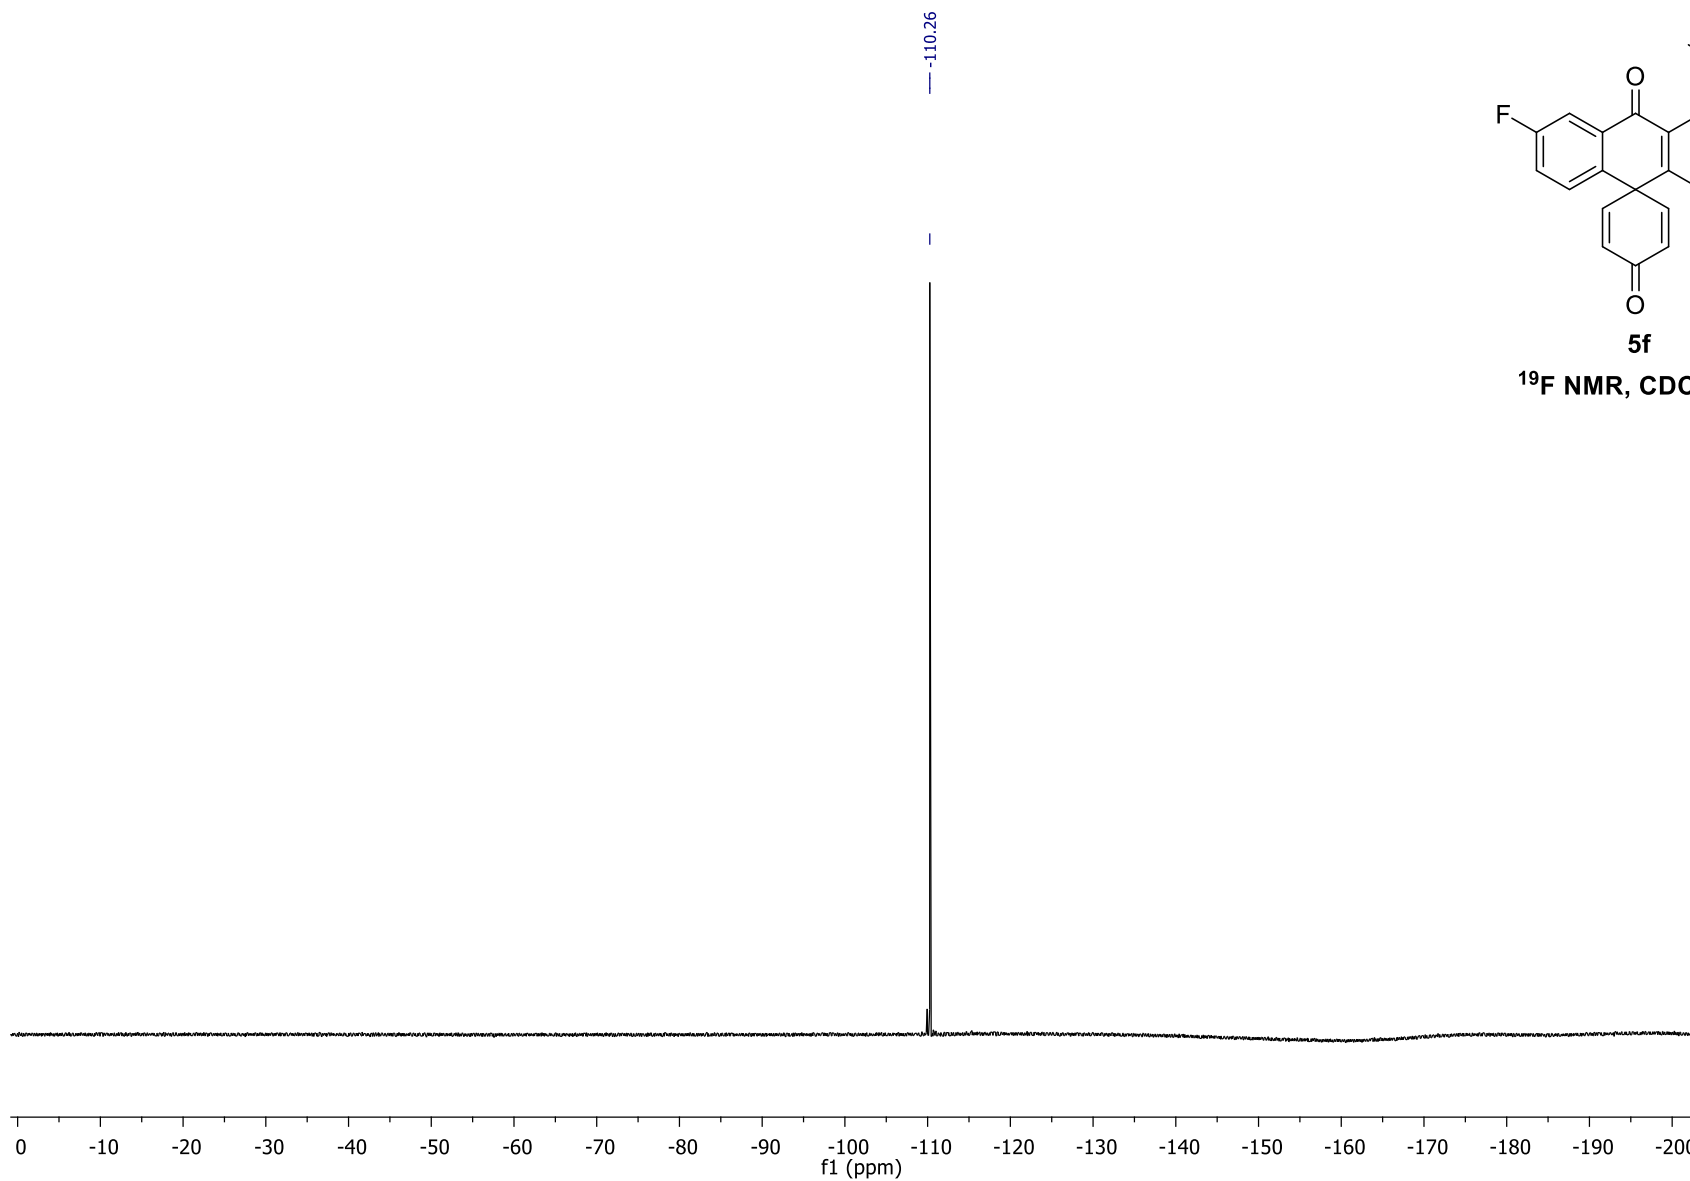

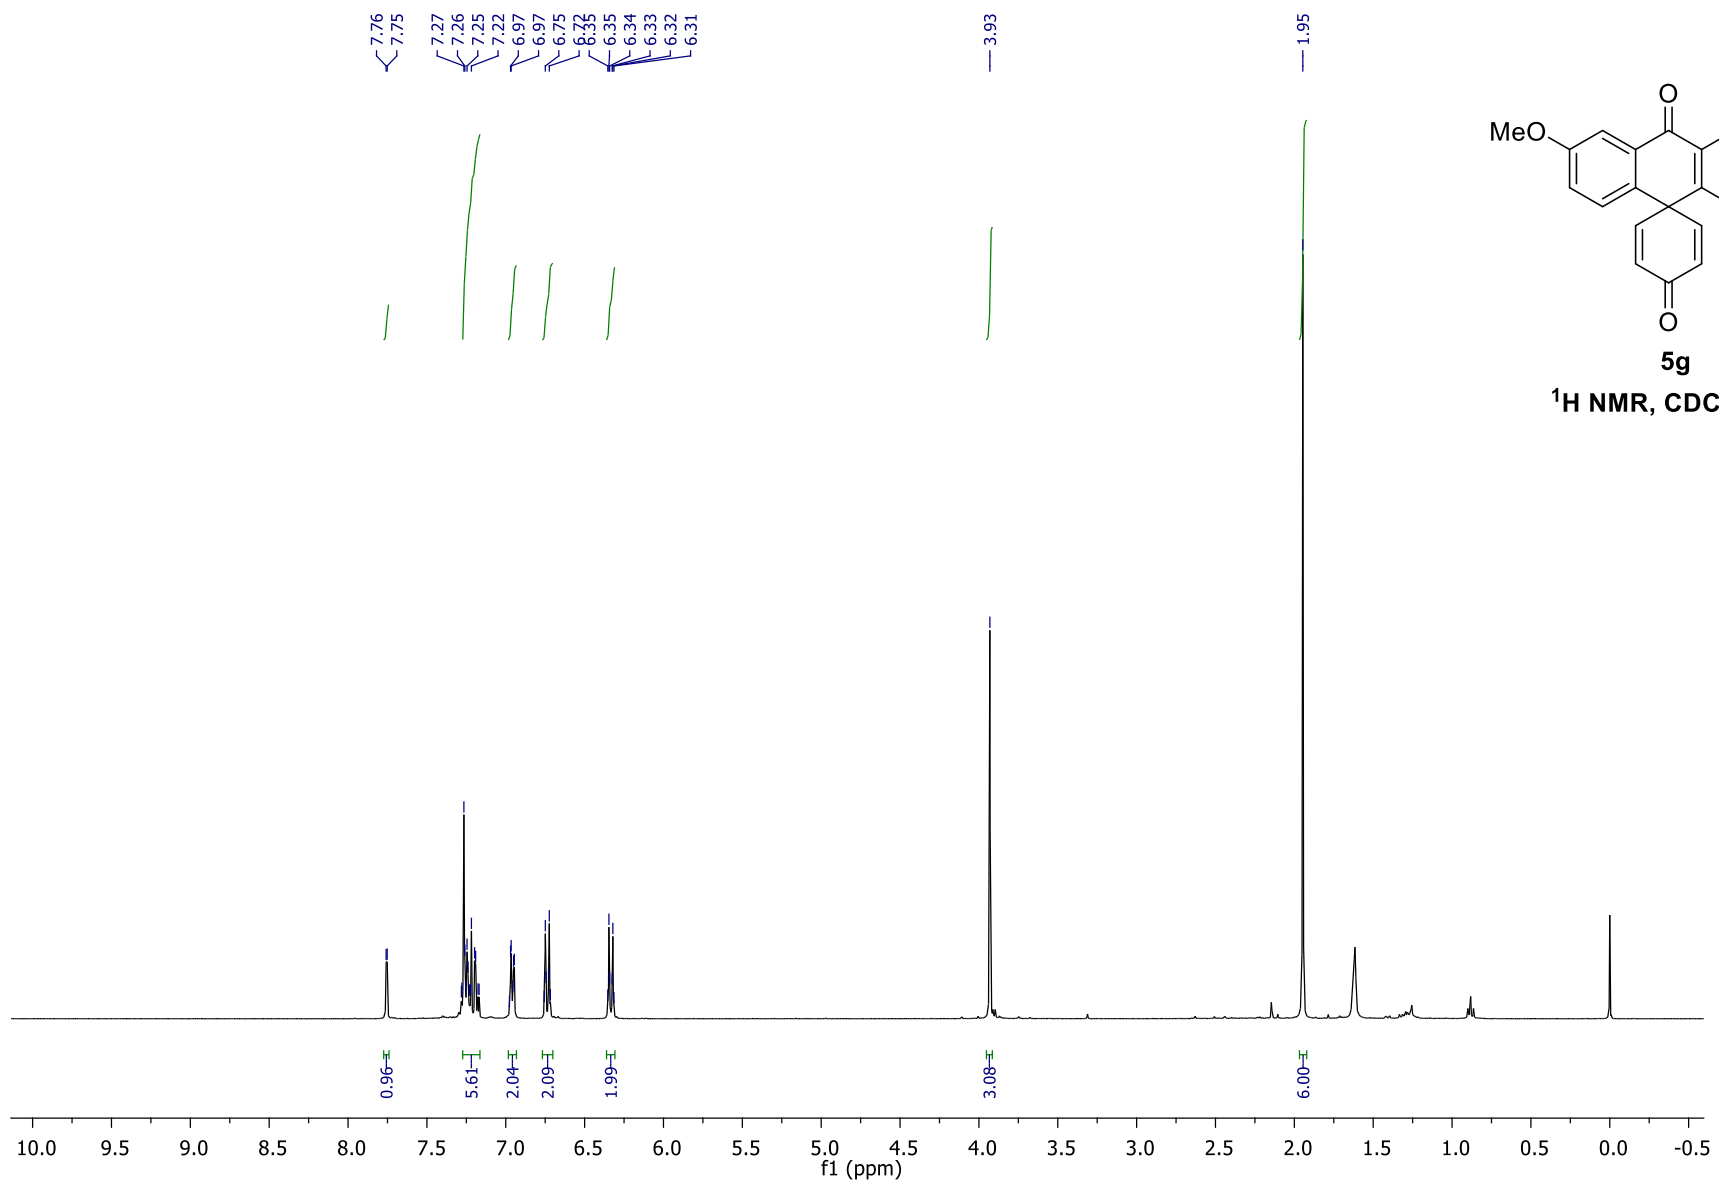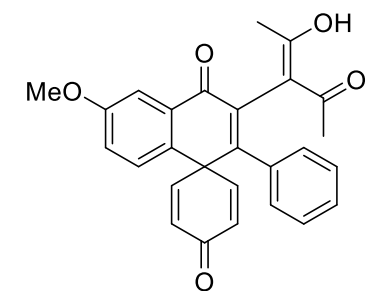

**5g**

**<sup>1</sup>H NMR, CDCl<sub>3</sub>, 400MHz**

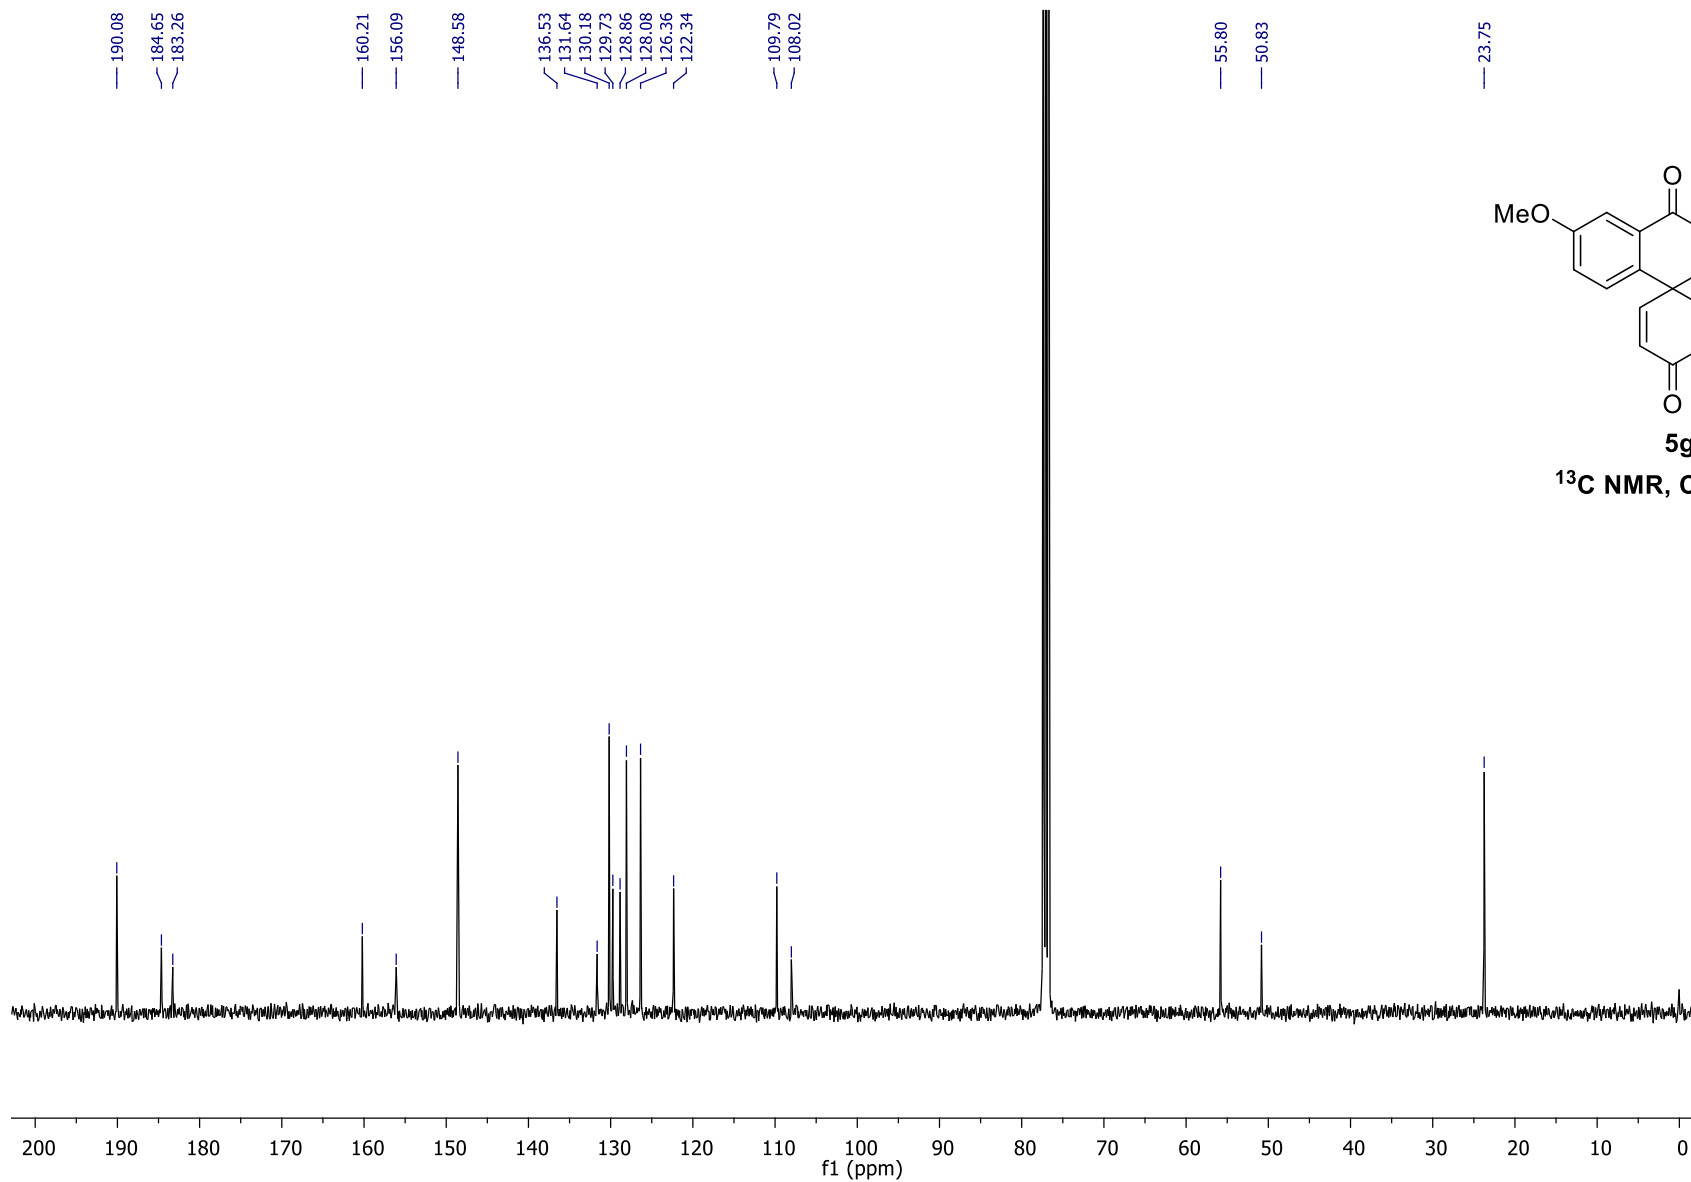

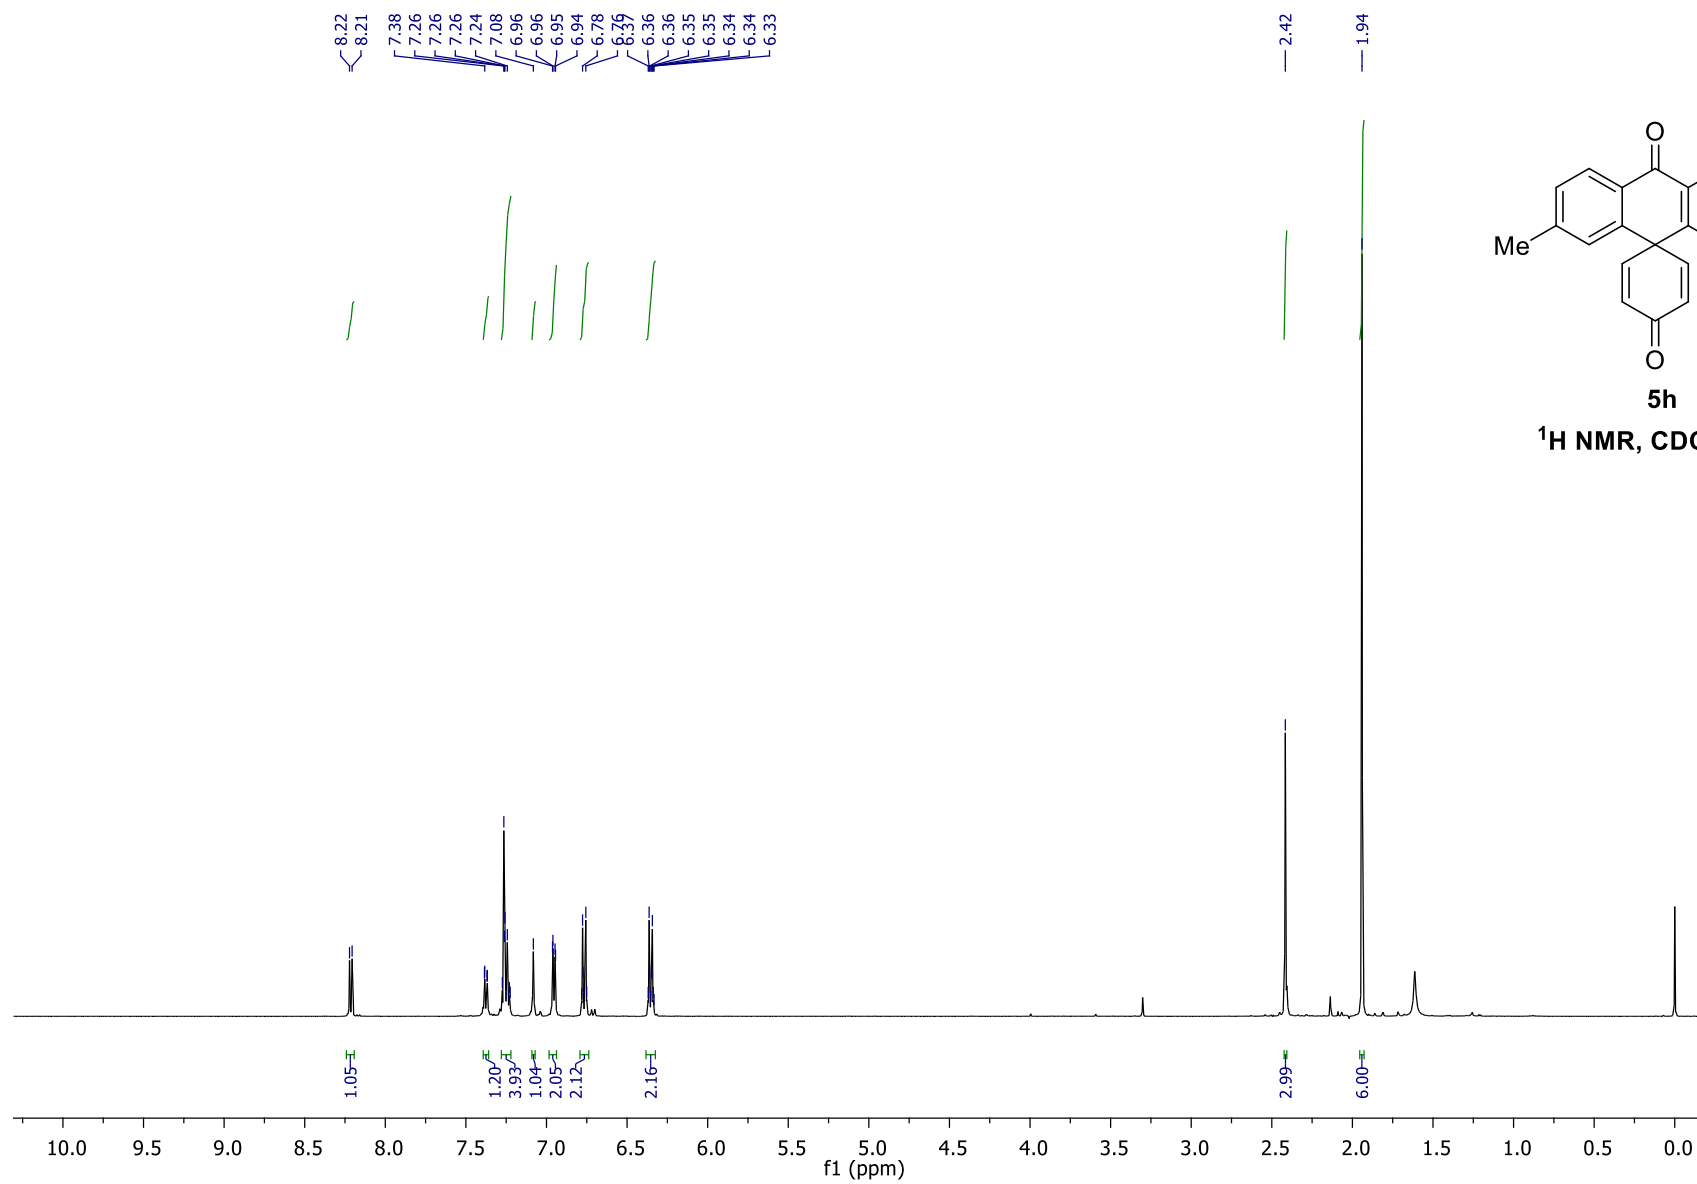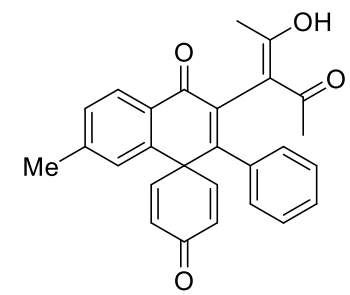

5h

<sup>1</sup>H NMR, CDCl<sub>3</sub>, 500MHz

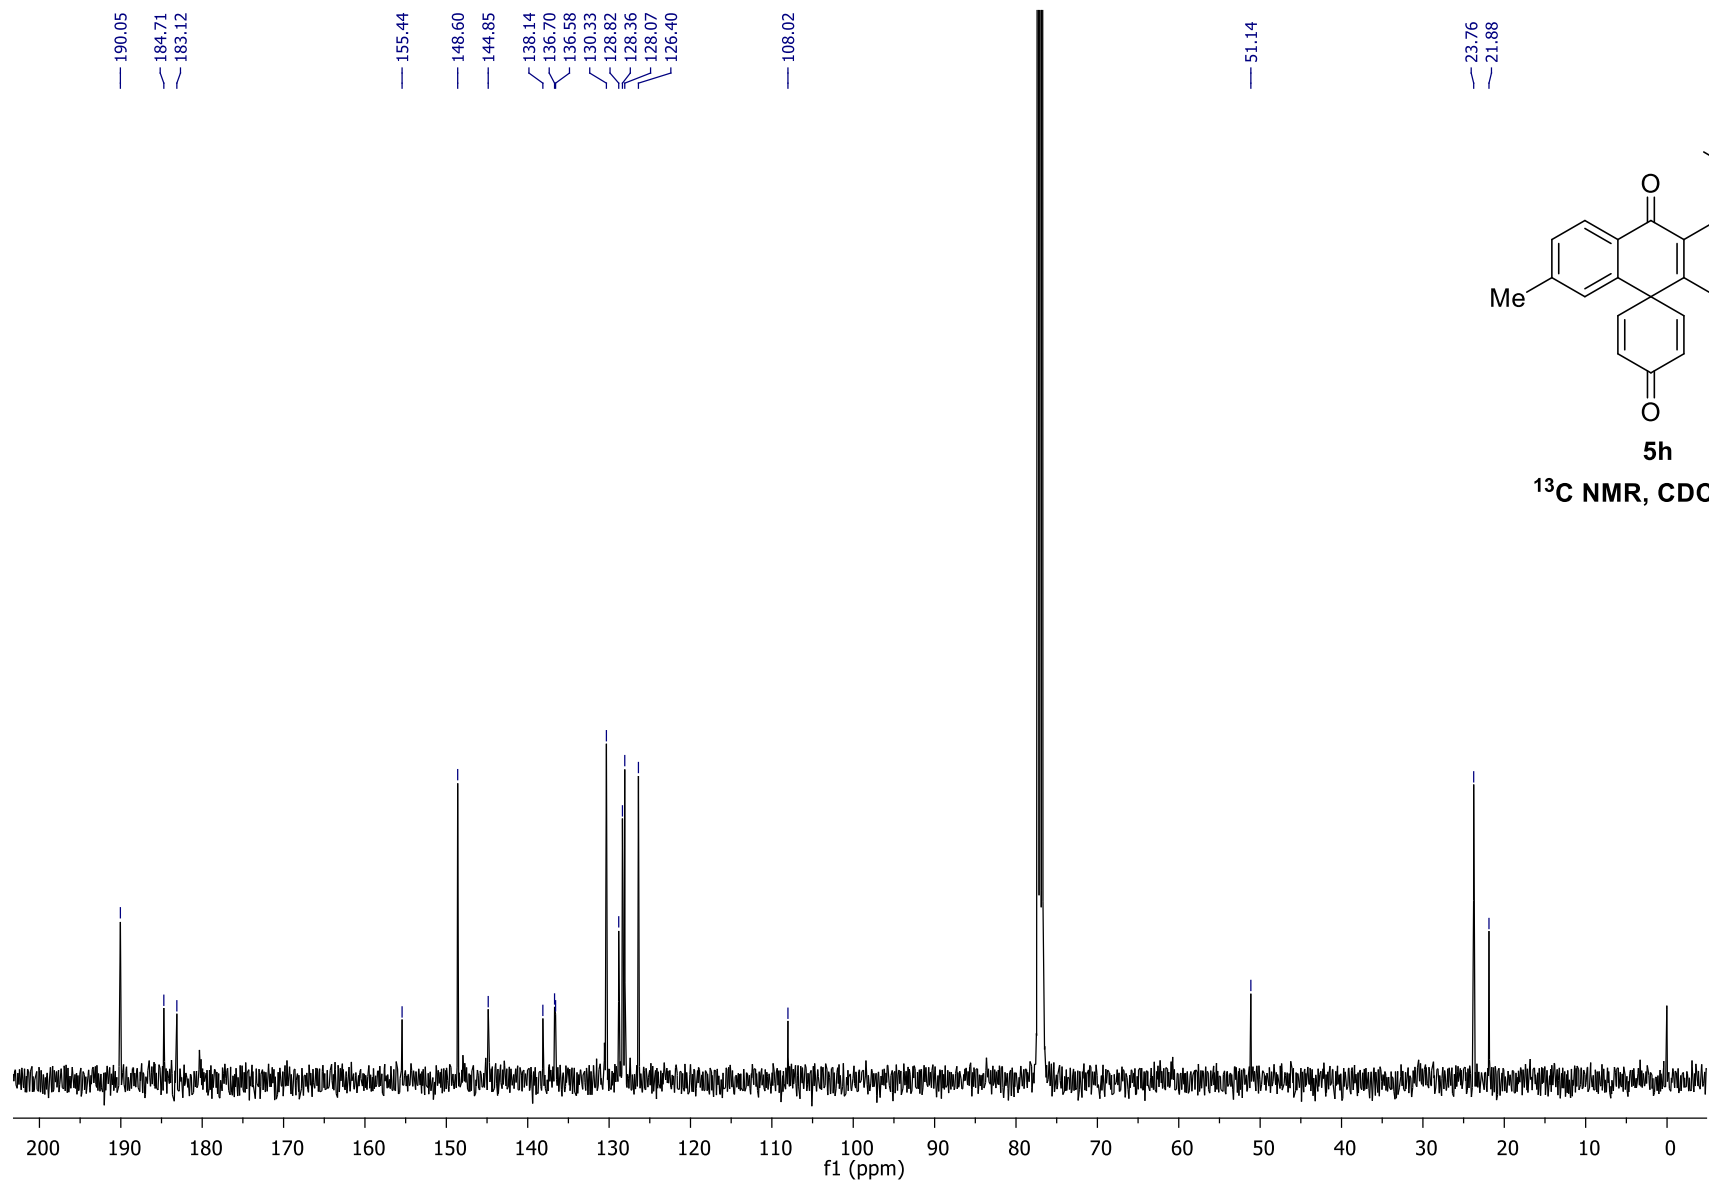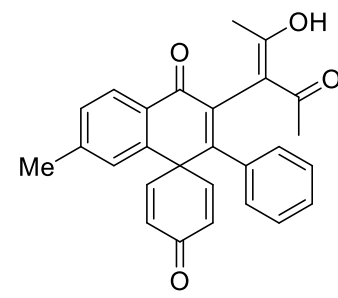

**5h**

<sup>13</sup>C NMR, CDCl<sub>3</sub>, 126MHz



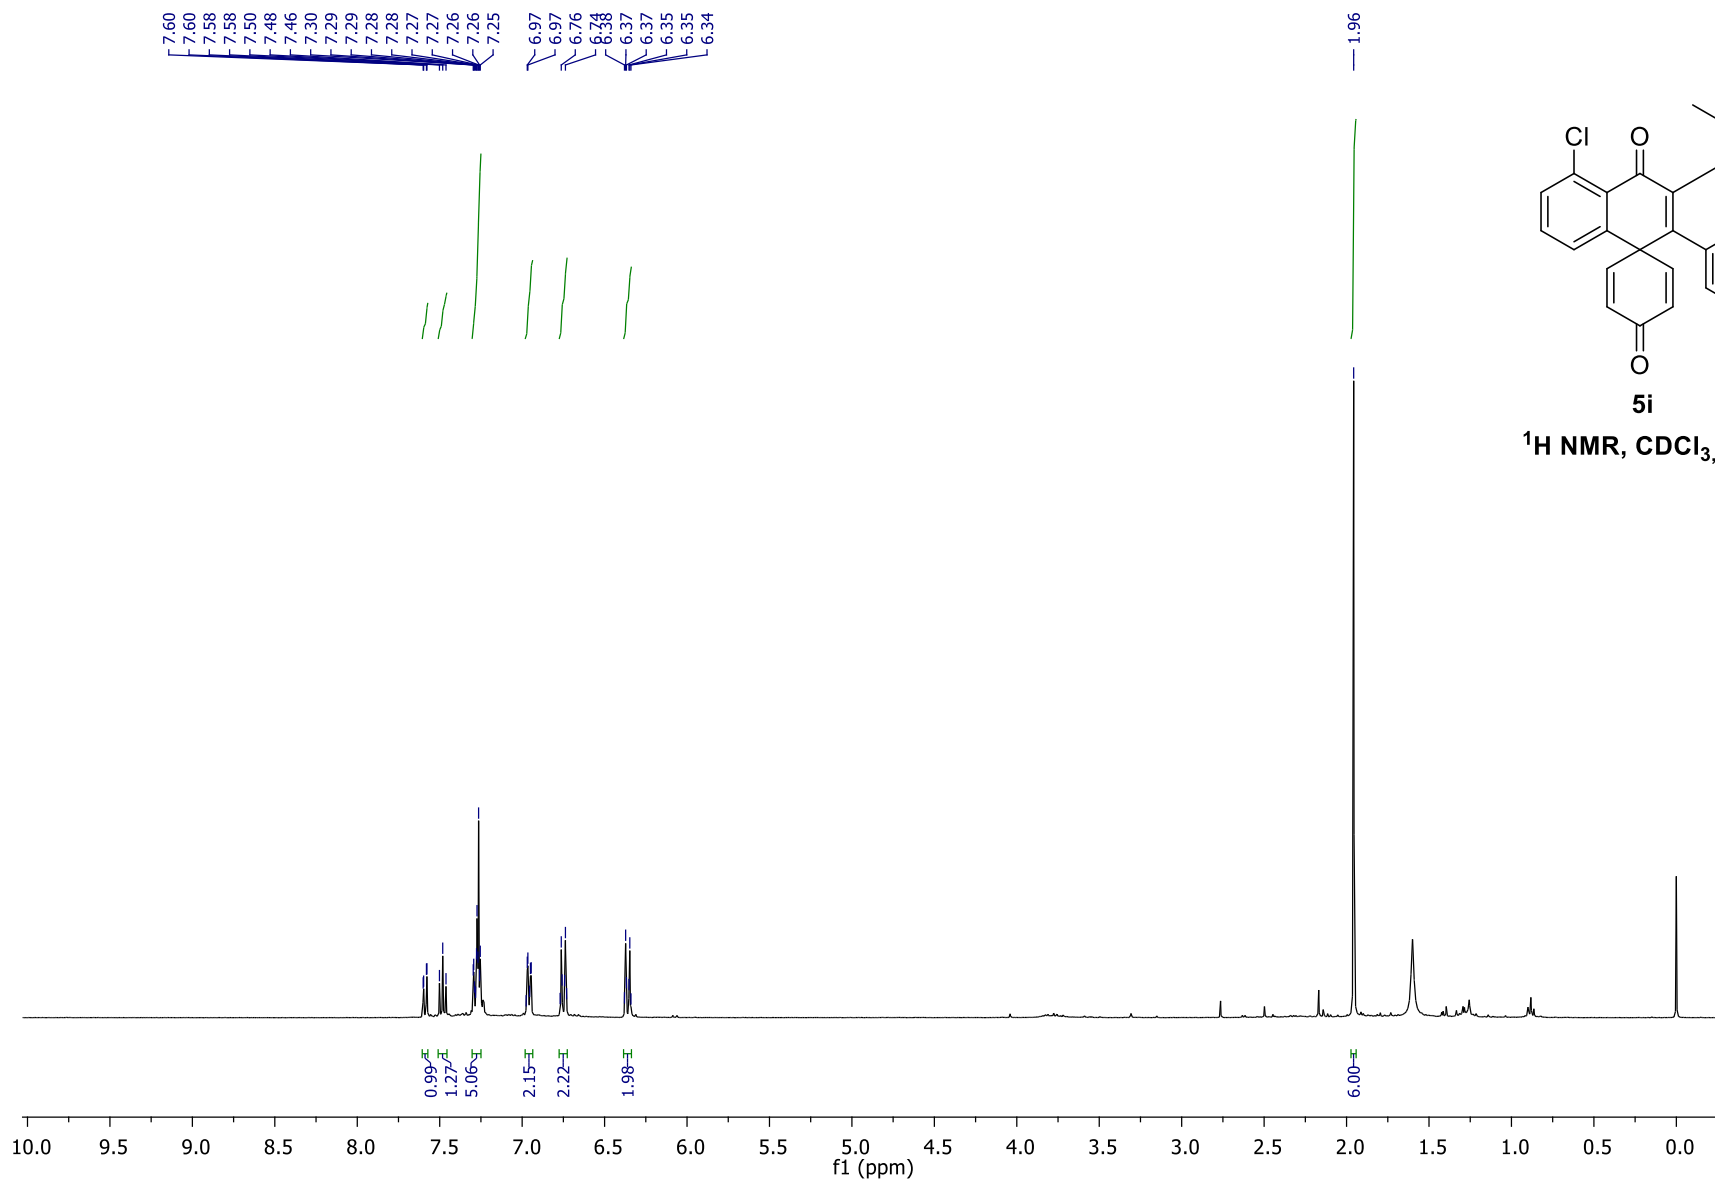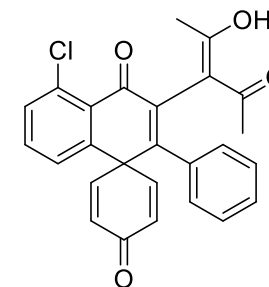

5i

<sup>1</sup>H NMR, CDCl<sub>3</sub>, 400MHz

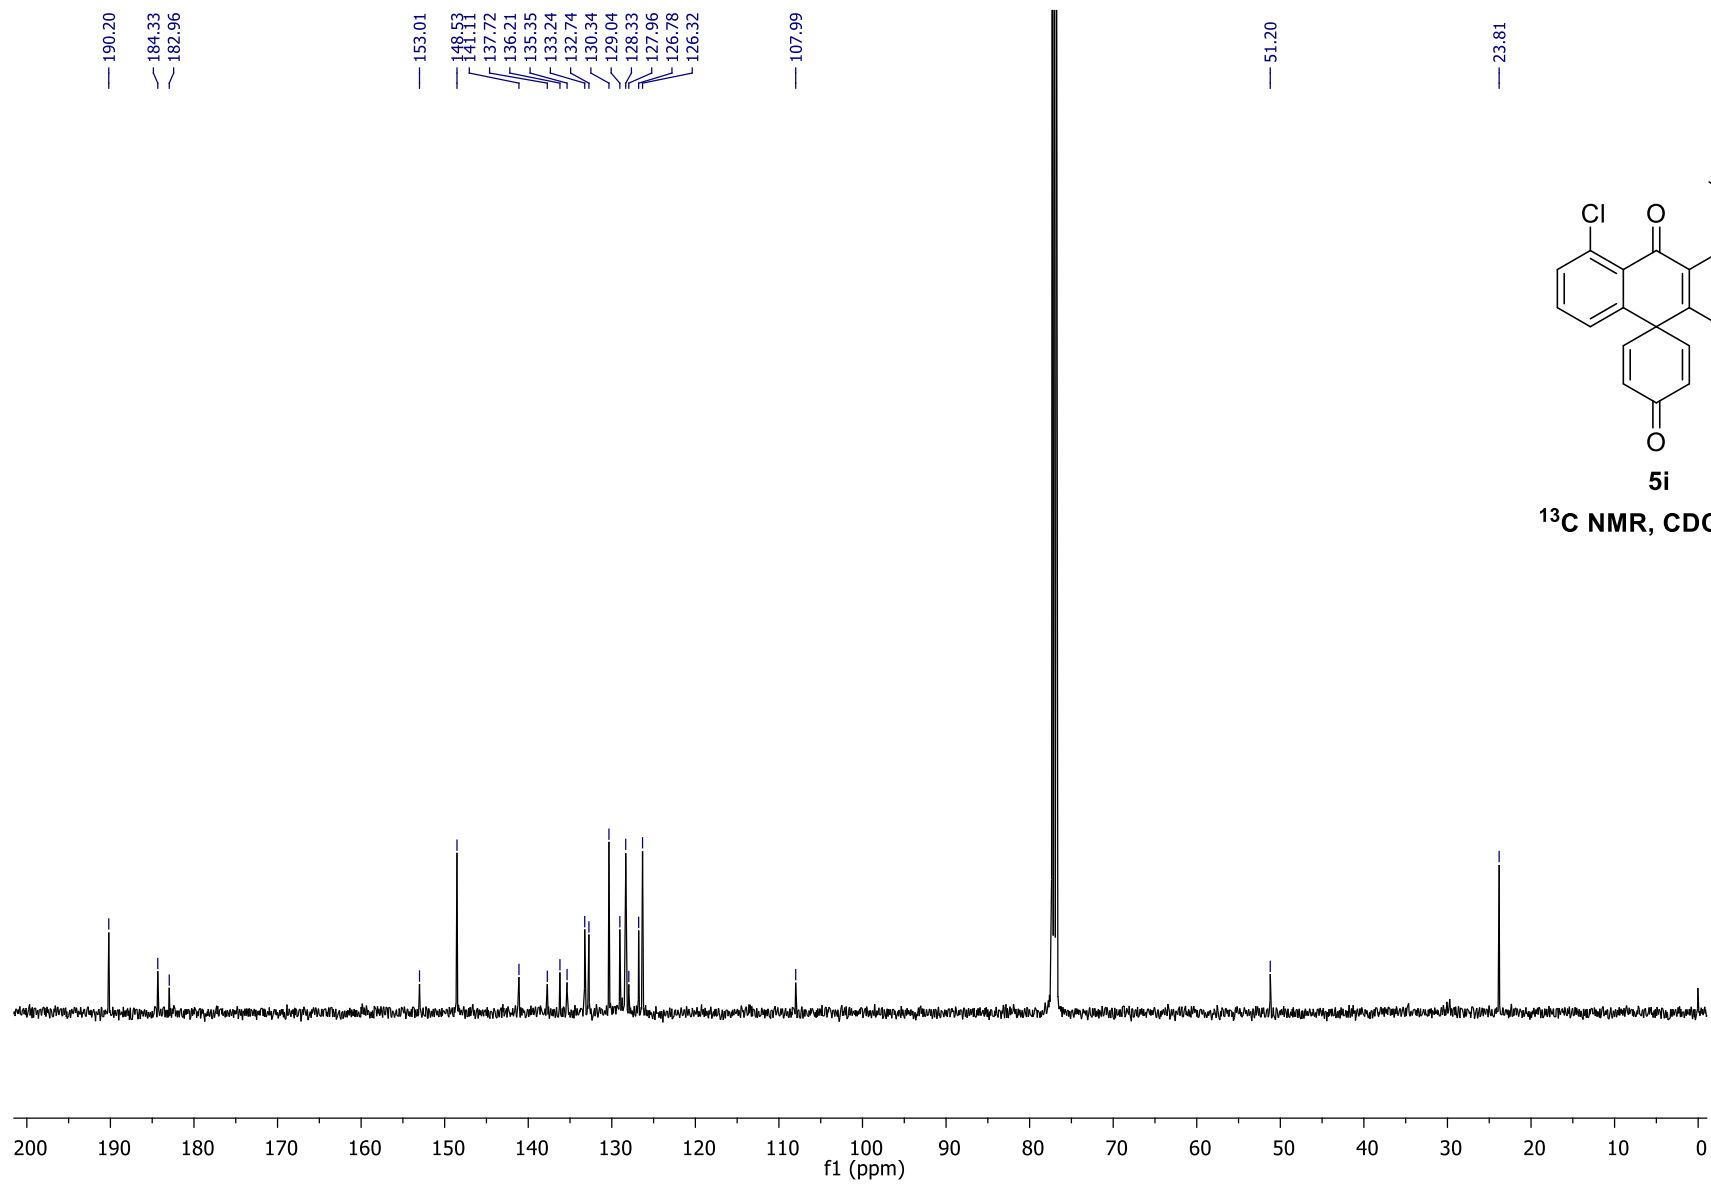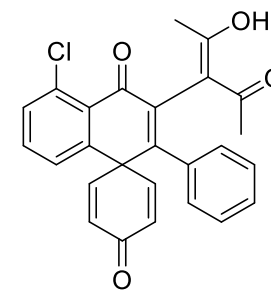

5i

<sup>13</sup>C NMR, CDCl<sub>3</sub>, 126MHz

5476

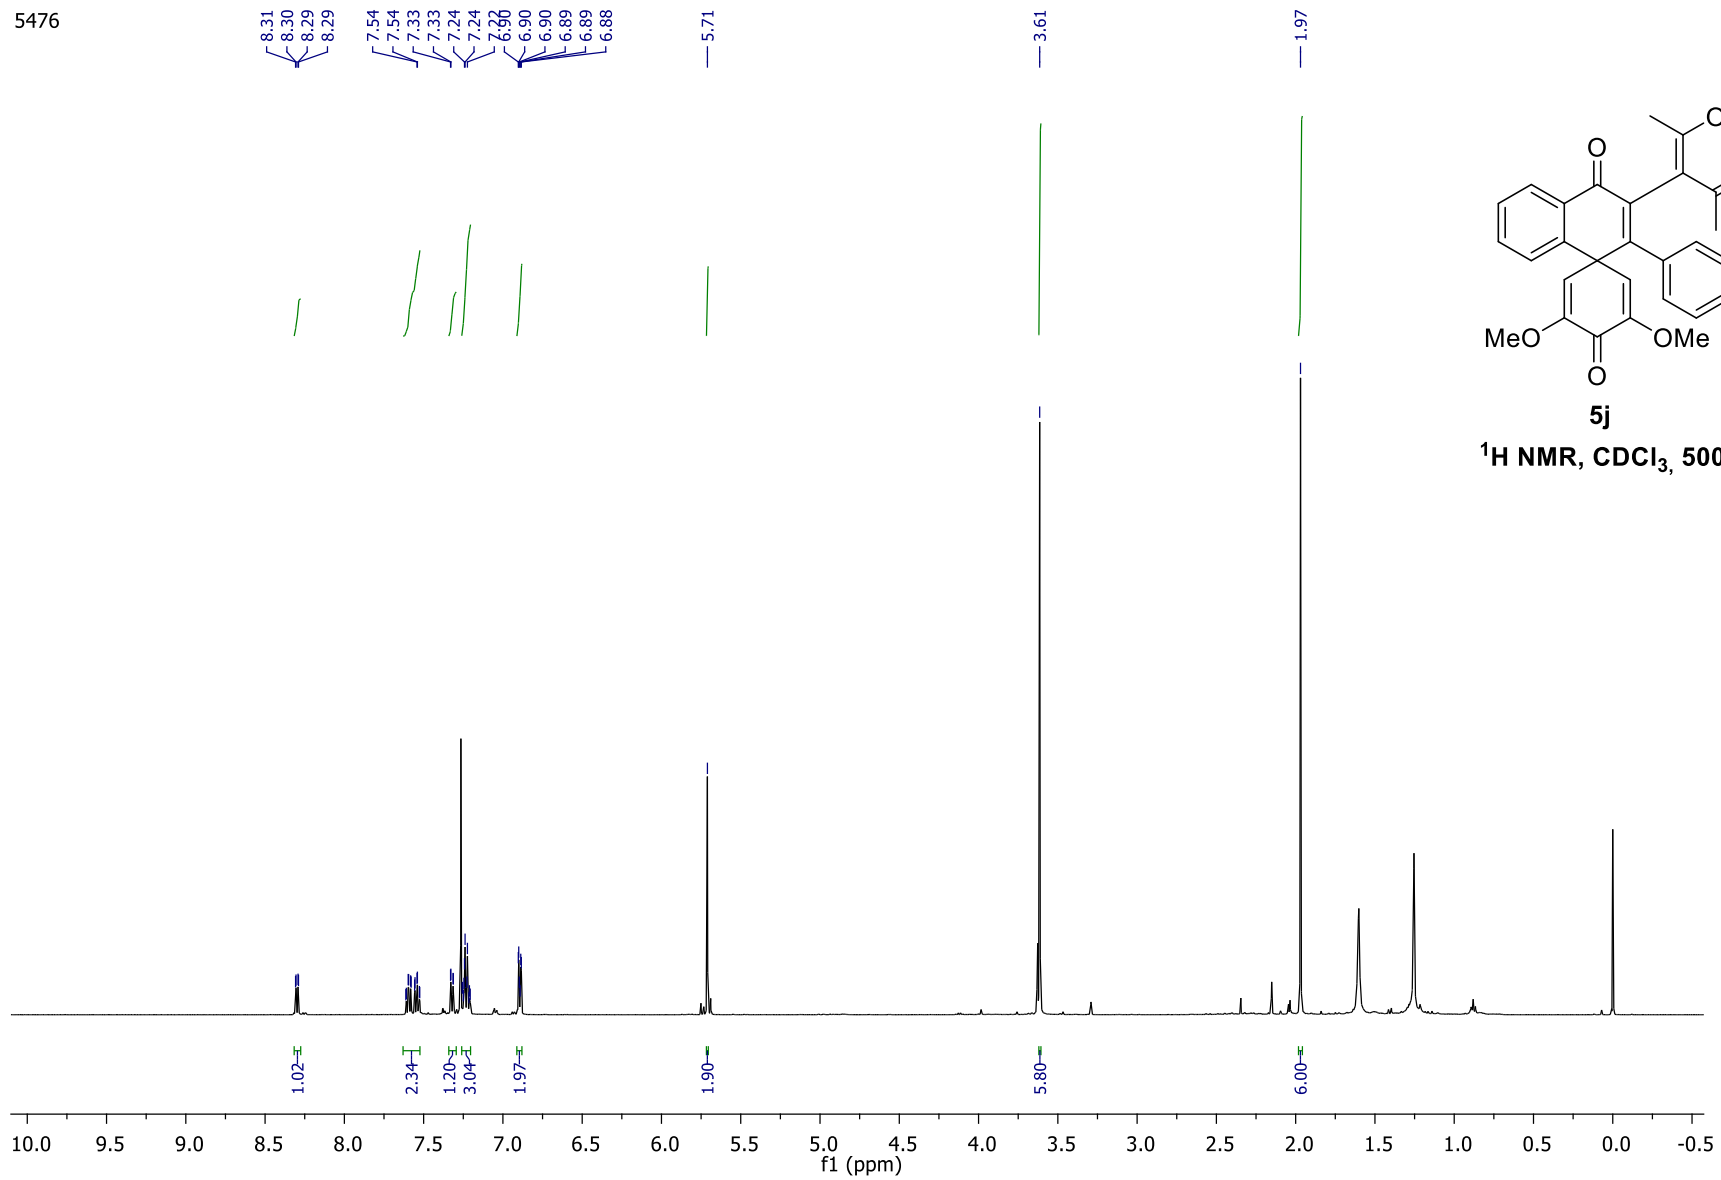

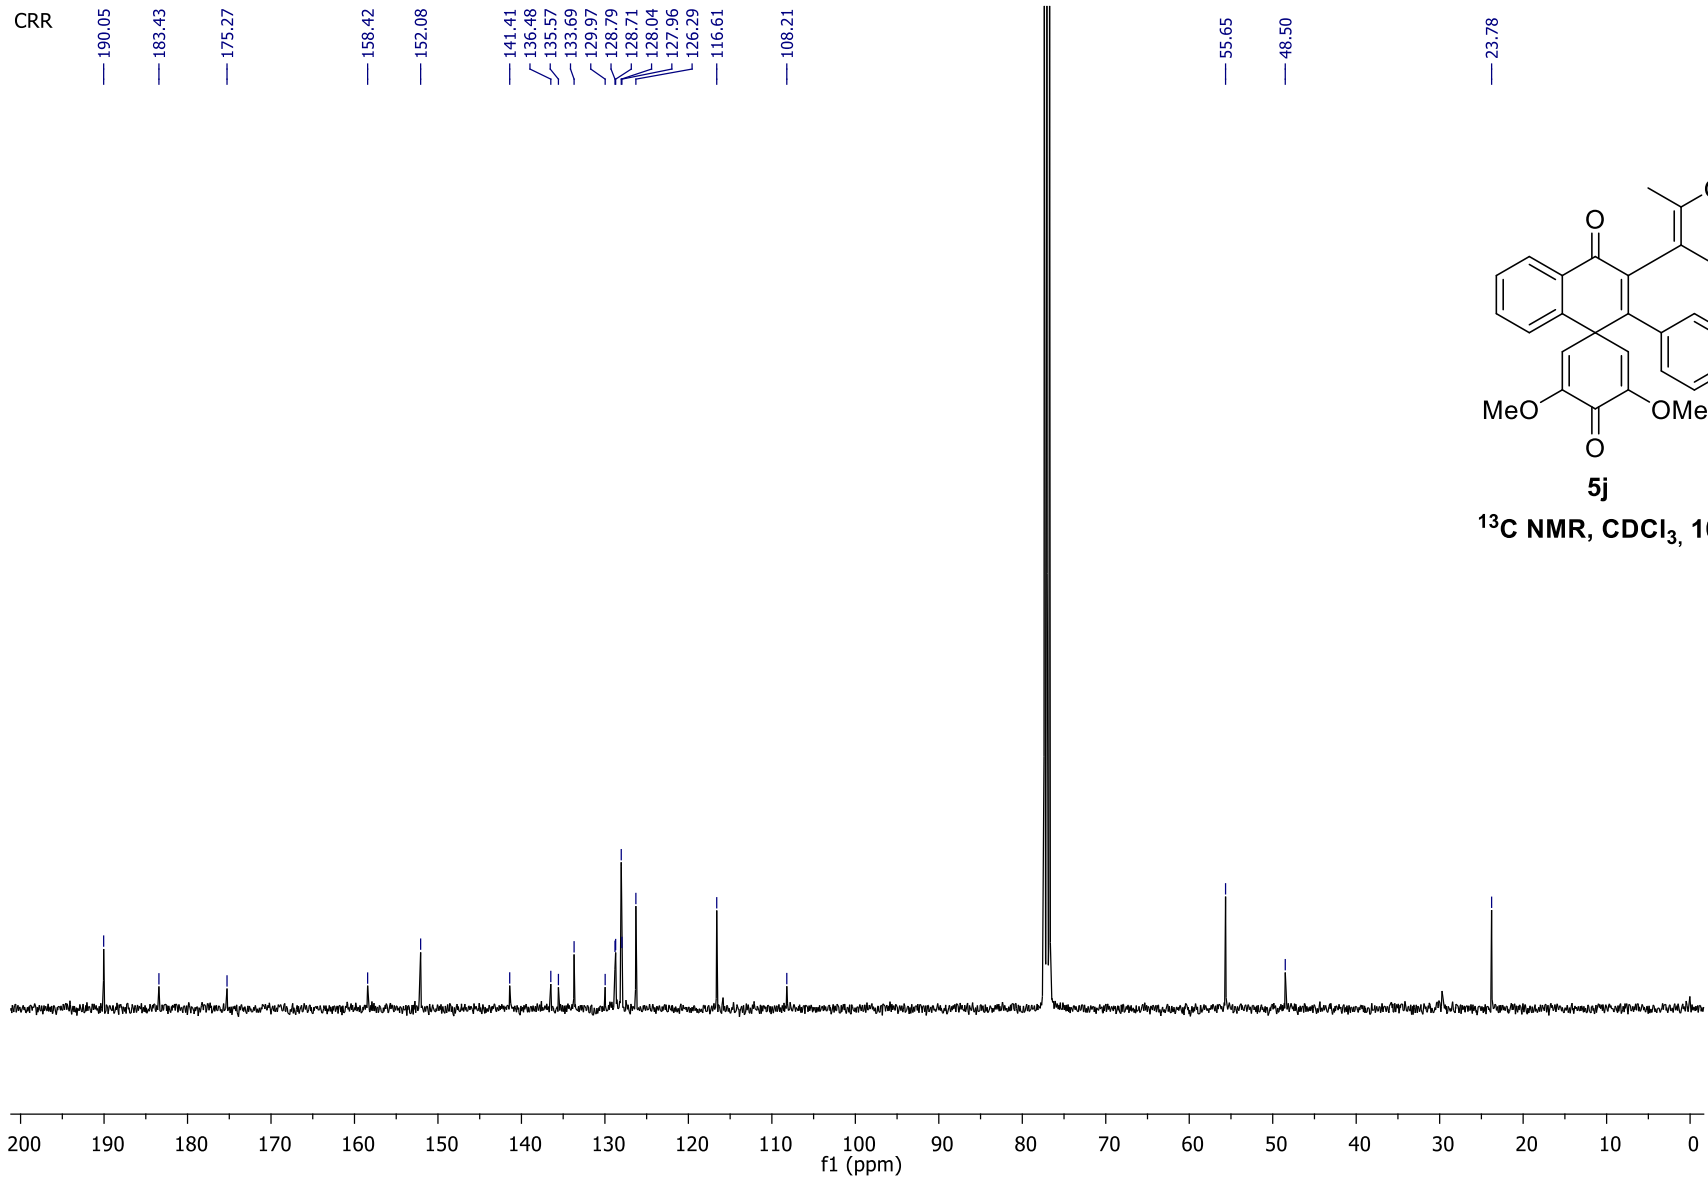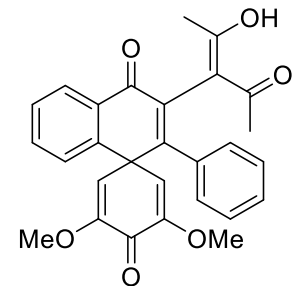

5j

<sup>13</sup>C NMR, CDCl<sub>3</sub>, 101MHz

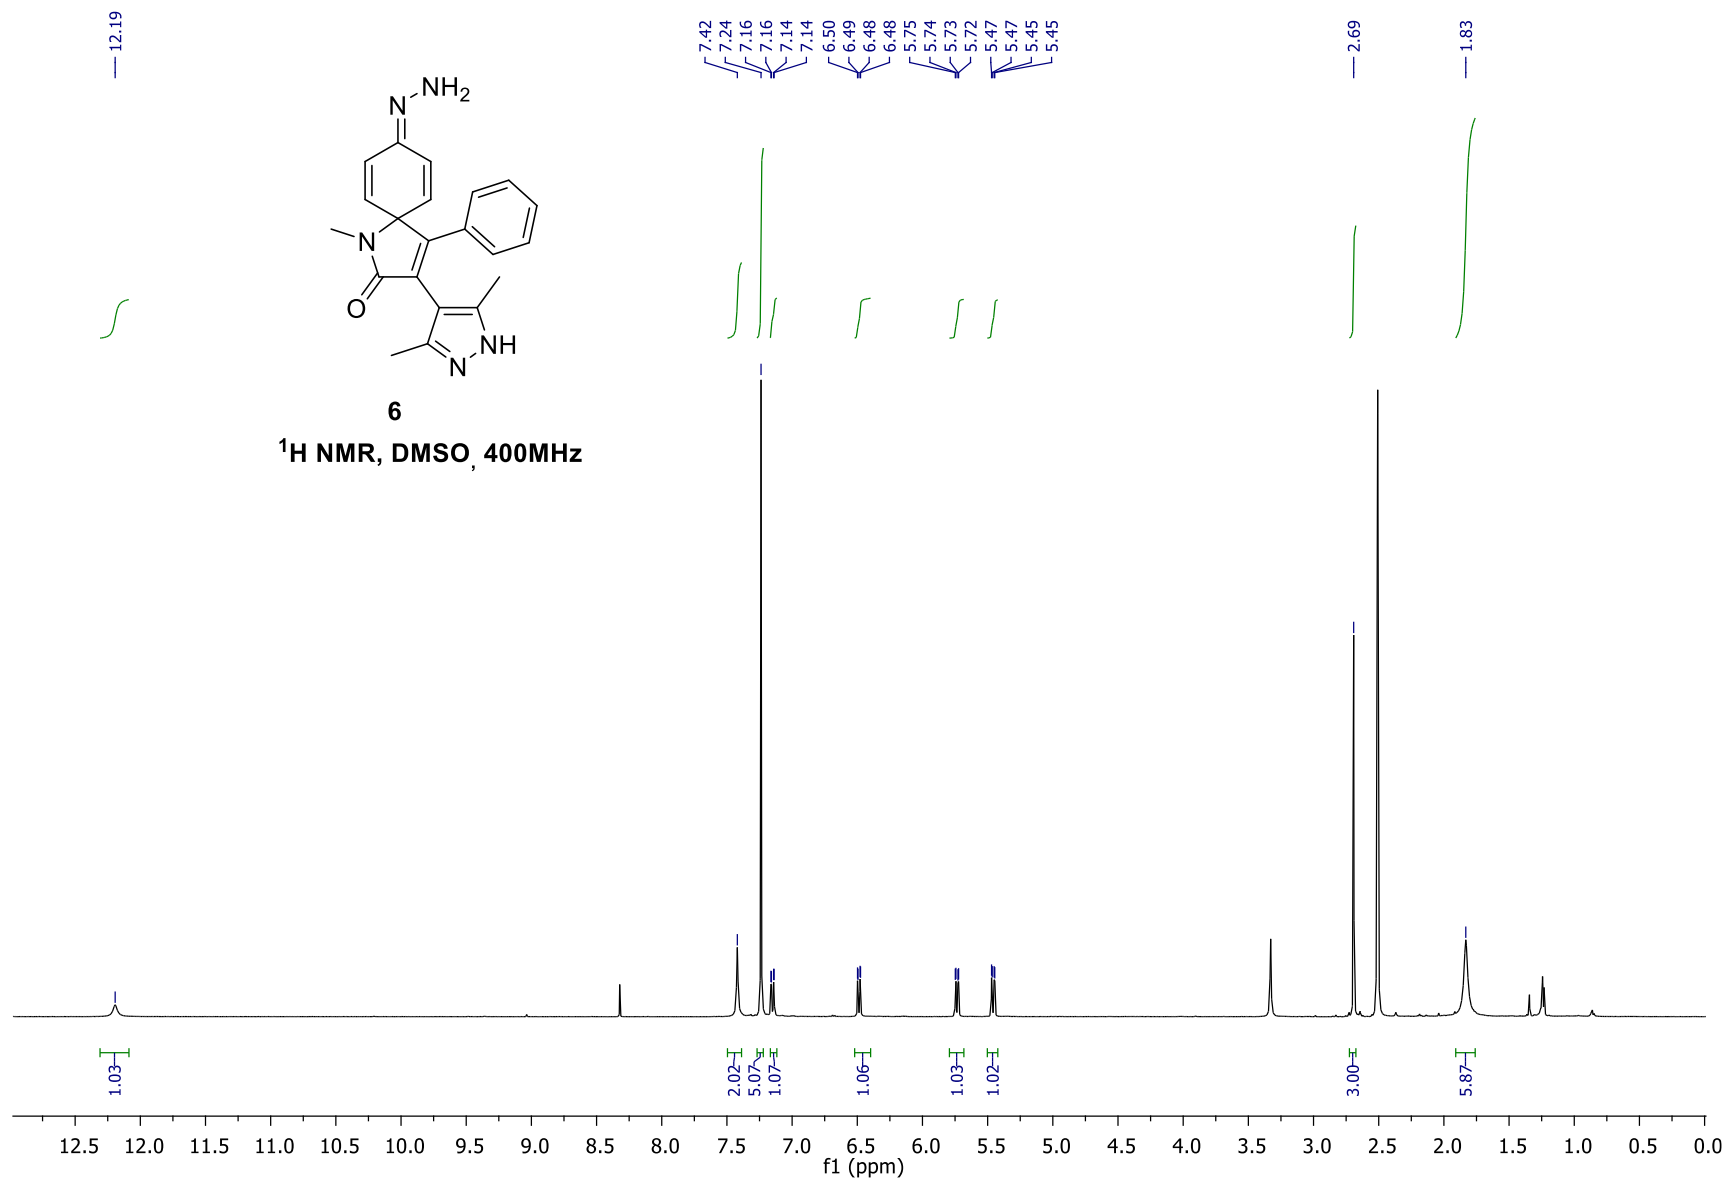

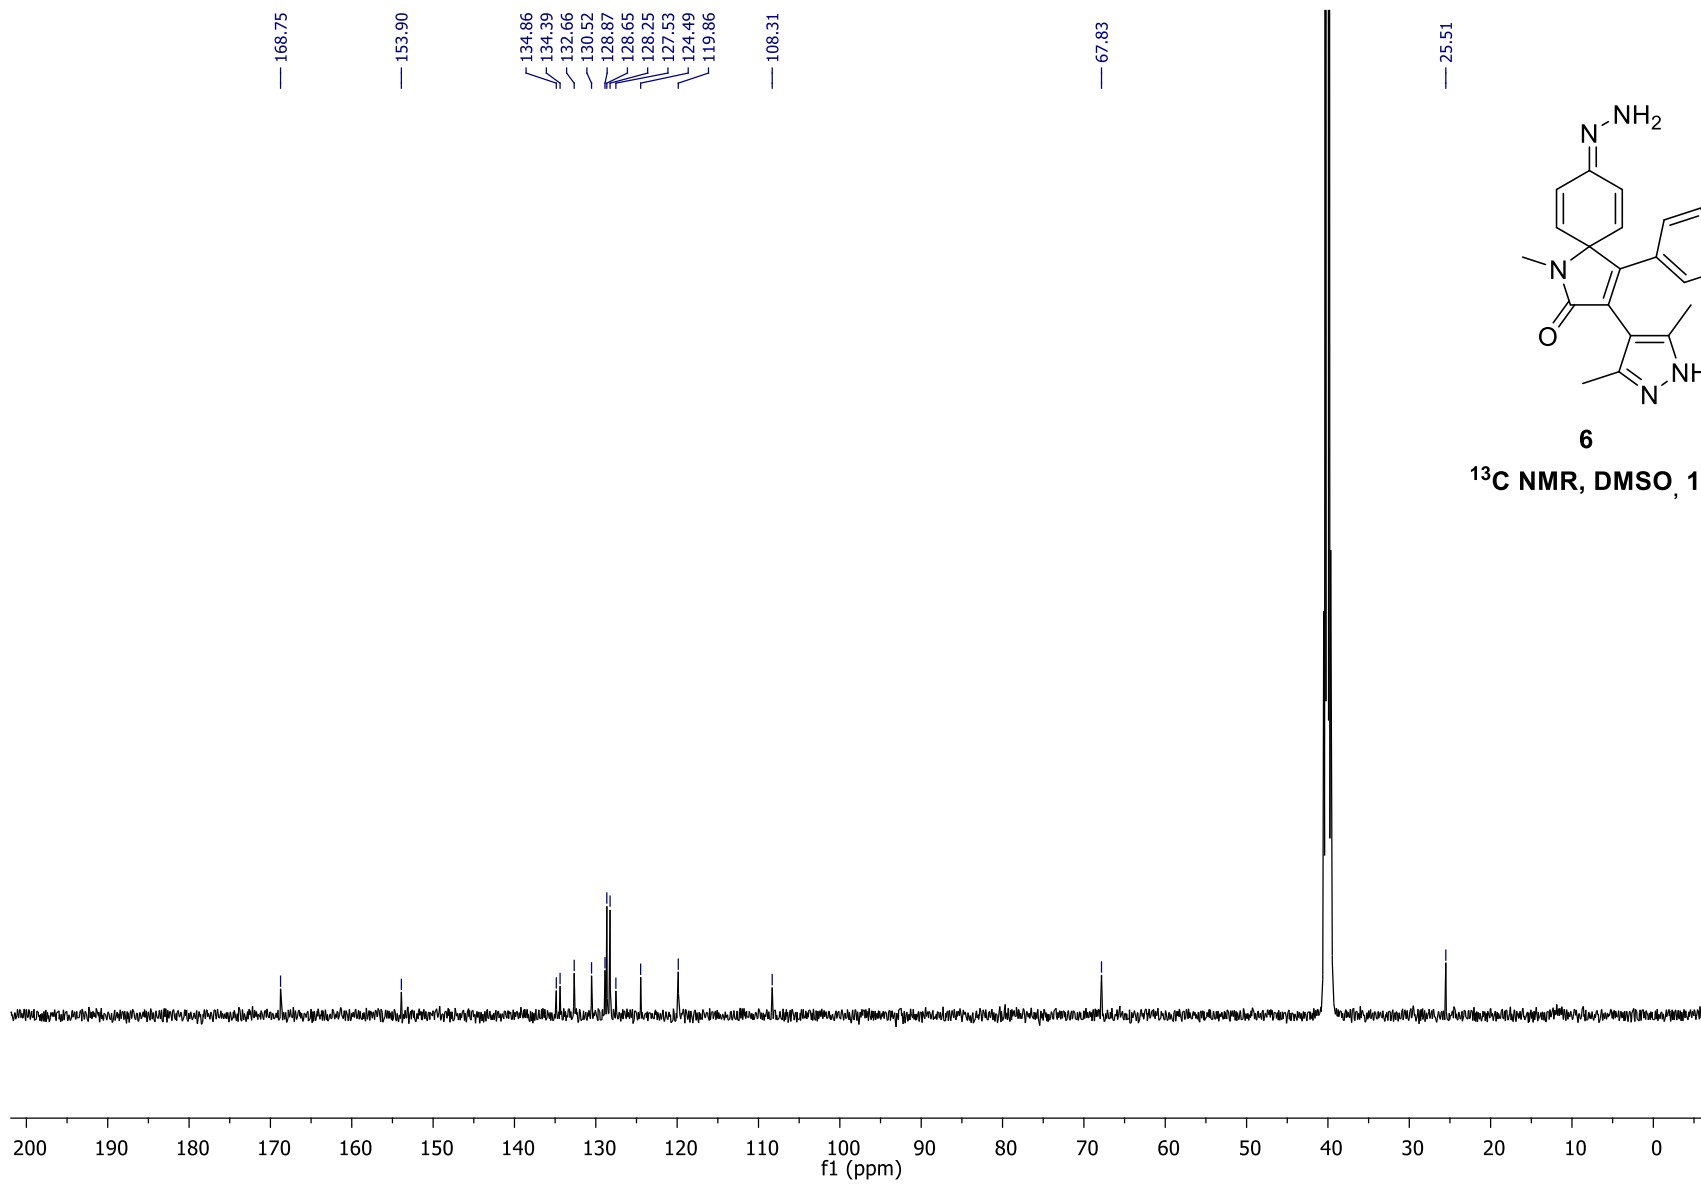

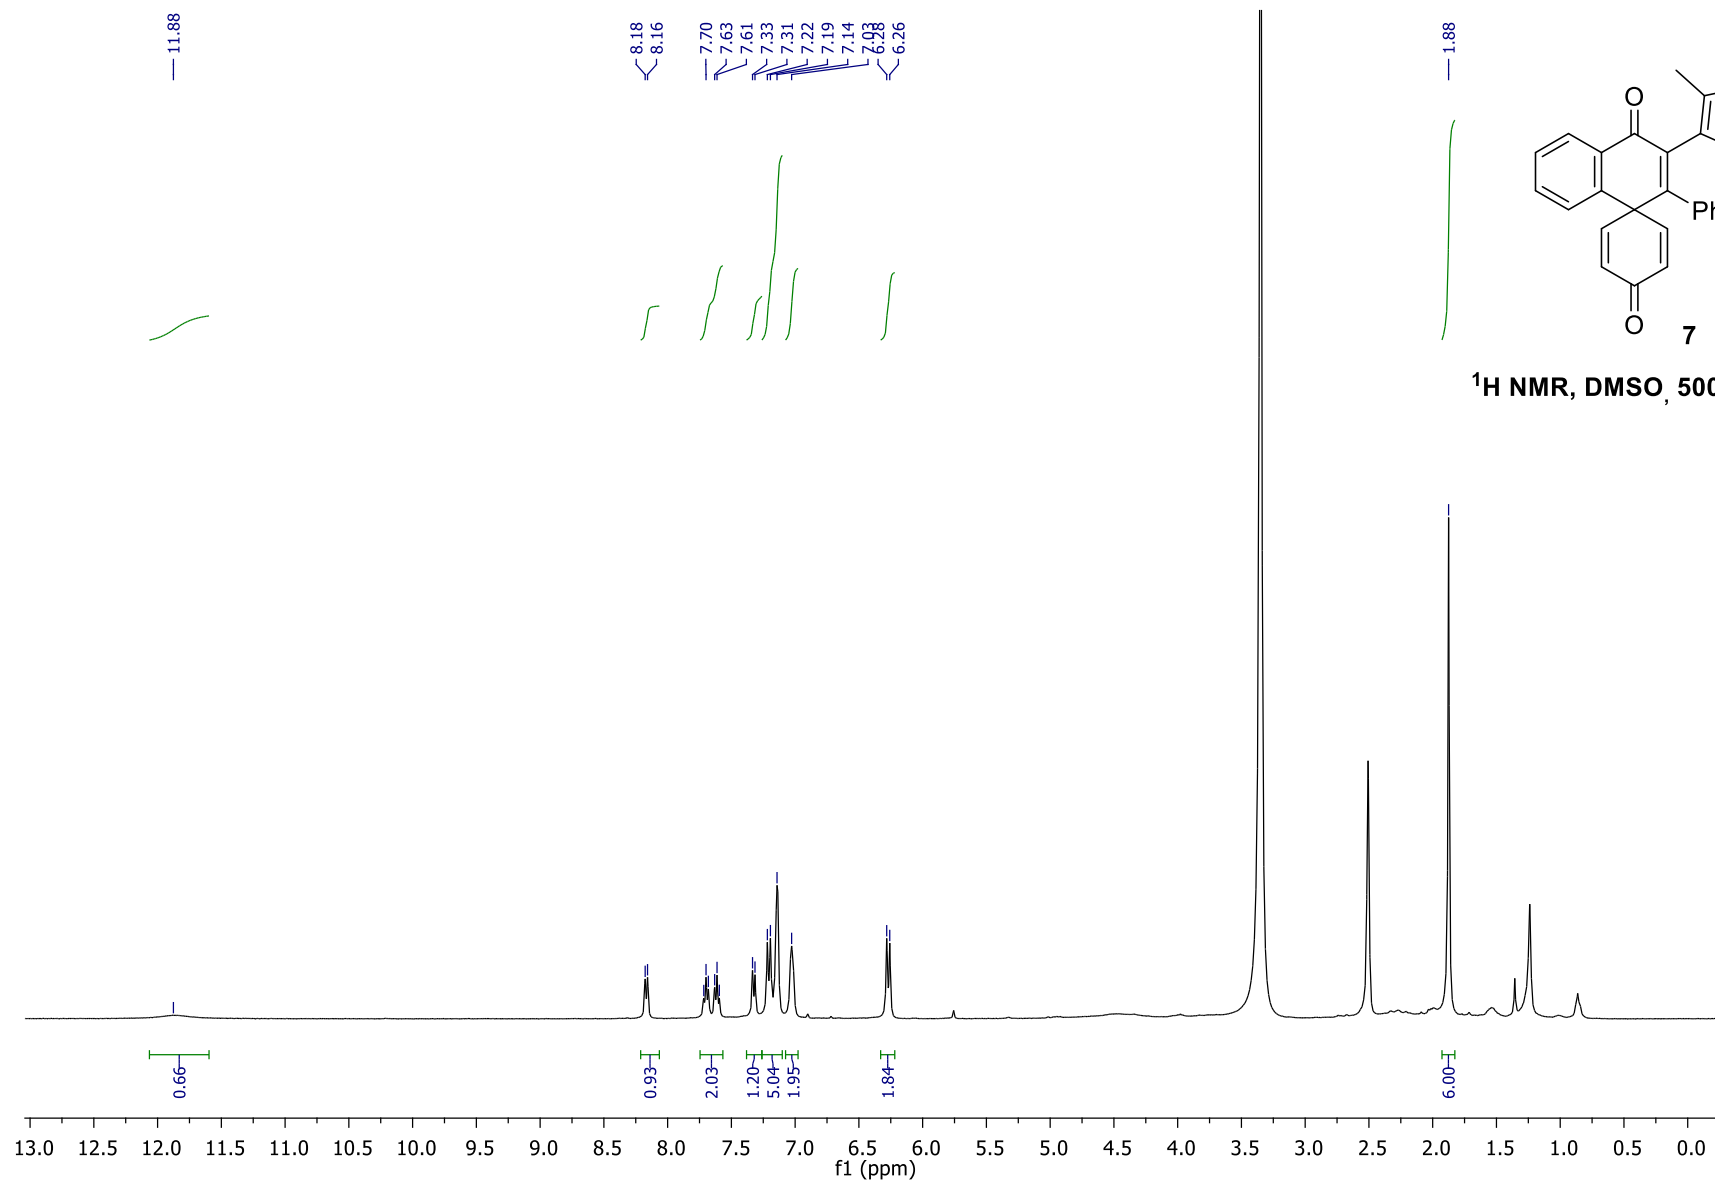

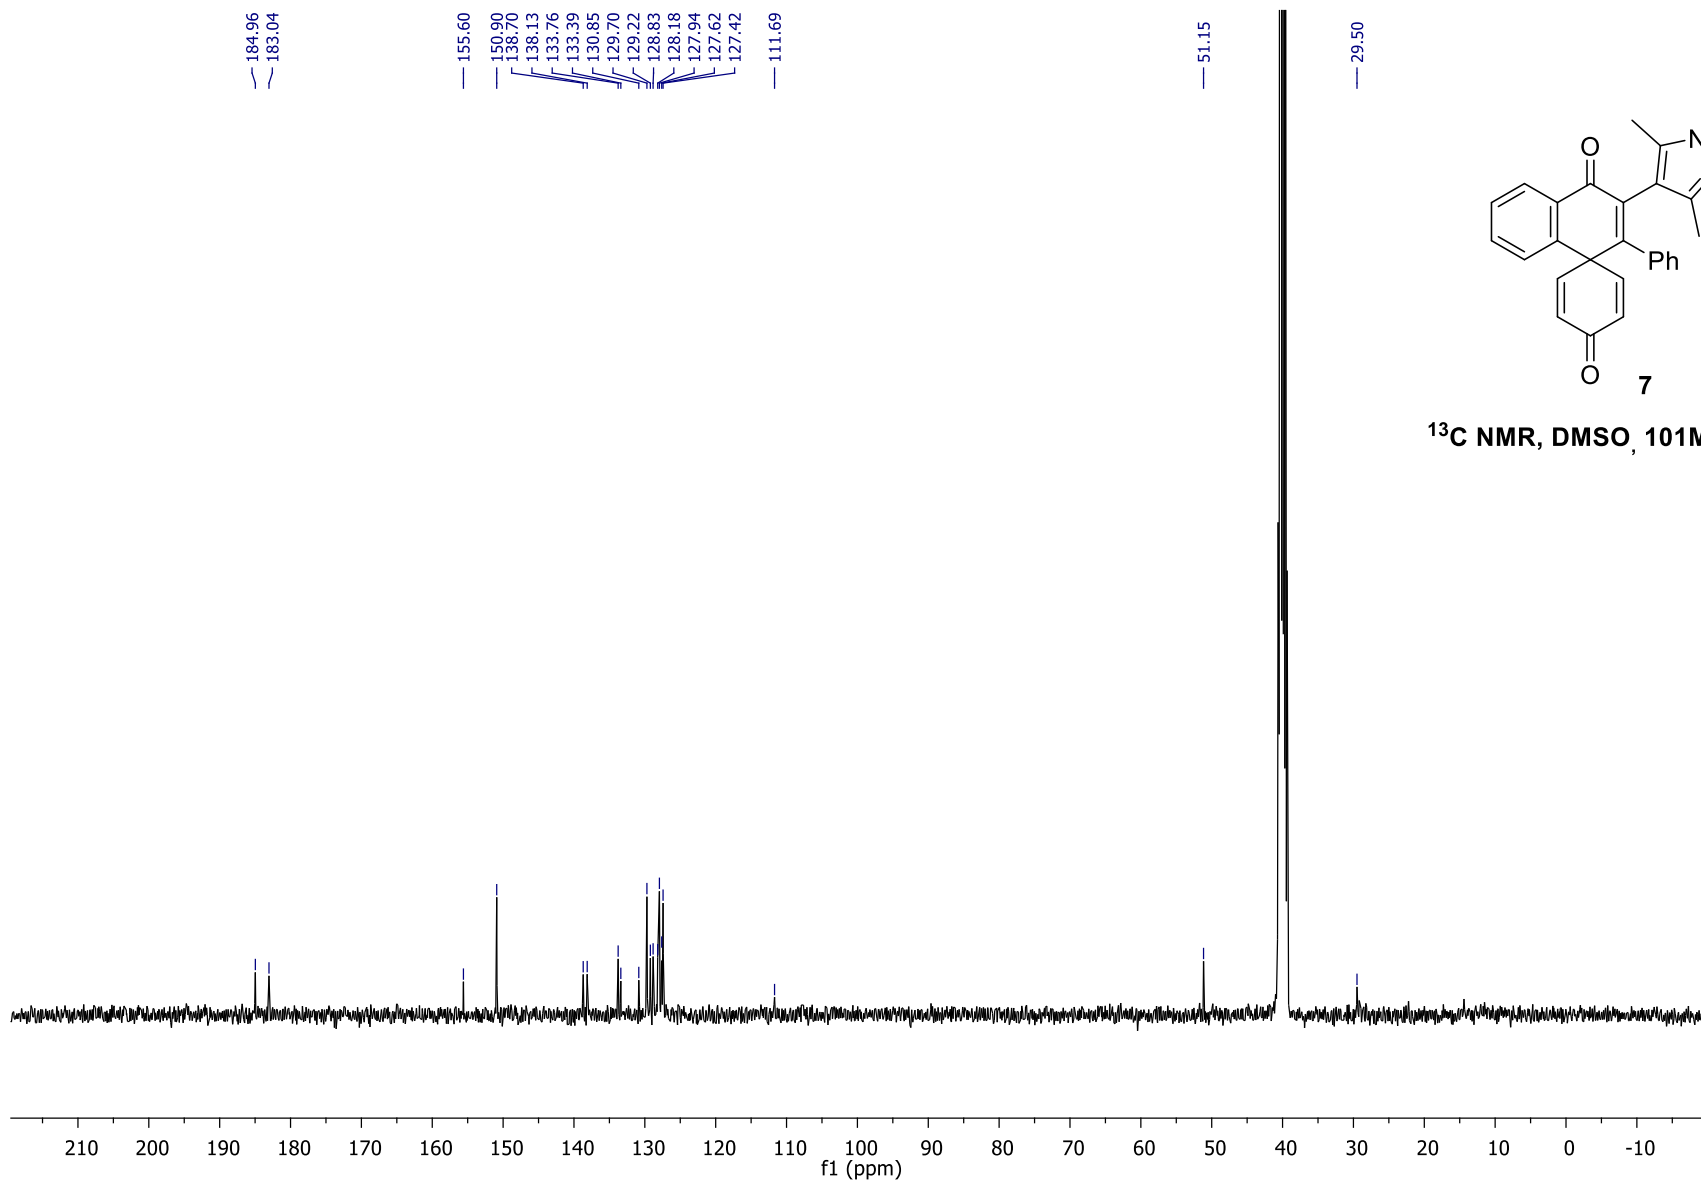



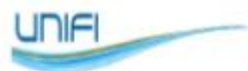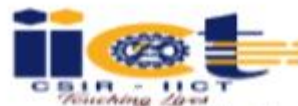

Created by: Shekar, Dr.Anubala

Created on: Feb 11, 2022

Item name: HRMS Elemental composition Feb 11, 2022 17:38:28 India Standard Time

Created time: 17:42:55 India Standard Time

Item name: CRR-255

Item name: CRR-255, Sample position: I-A.1, Replicate number: 1

|   | Component name | Observed neutral mass (Da) | Neutral mass (Da) | Observed m/z | Mass error (ppm) | Adducts |
|---|----------------|----------------------------|-------------------|--------------|------------------|---------|
| 1 | C14H25NO3      | 255.2568                   | 255.18344         | 254.7648     | 286.5            | +H      |

Component name: C14H25NO3

Item name: CRR-255

Item description:

Channel name: Low energy : Time 0.3112 +/- 0.0646 minutes

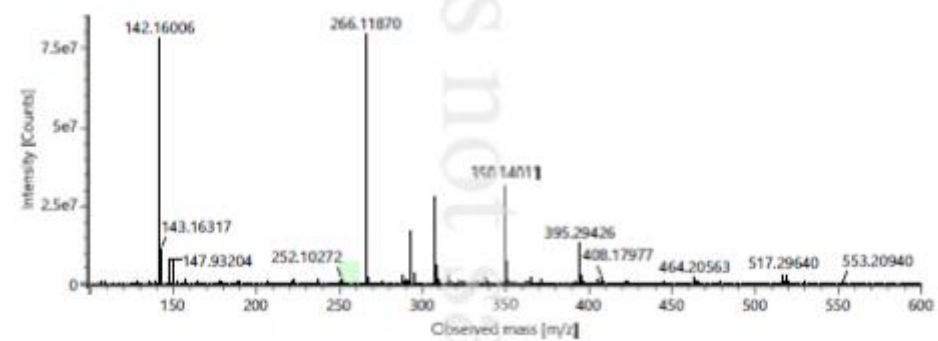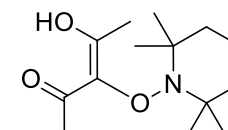

TEMPO-diketone adduct, X  
HRMS found for C<sub>14</sub>H<sub>26</sub>NO<sub>3</sub>:256.2641

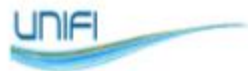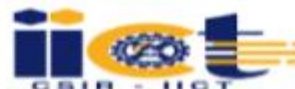

Created by: Shekar, Dr.Anubala

Created on: Feb 10, 2022

Item name: HRMS Elemental composition Feb 10, 2022 12:08:23 India Standard Time

Created time: 12:12:56 India Standard Time

Item name: CRR-351

Item name: CRR-351, Sample position: 1:A:1, Replicate number: 1

|   | Component name                                                     | Observed neutral mass (Da) | Neutral mass (Da) | Observed m/z | Mass error (ppm) | Adducts |
|---|--------------------------------------------------------------------|----------------------------|-------------------|--------------|------------------|---------|
| 1 | C <sub>21</sub> H <sub>19</sub> NO <sub>3</sub> [ <sup>18</sup> O] | 351.3848                   | 351.13565         | 352.3921     | 707.6            | +H      |

Component name: C<sub>21</sub>H<sub>19</sub>NO<sub>3</sub>[<sup>18</sup>O]

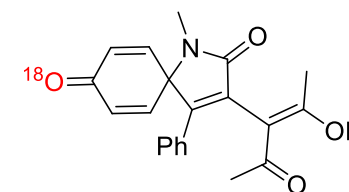

<sup>18</sup>O-3a, 89%

HRMS found for C<sub>21</sub>H<sub>20</sub>NO<sub>3</sub><sup>18</sup>O: 352.3921

Item name: CRR-351

Item description:

Channel name: Low energy : Time 0.3135 +/- 0.0581 minutes

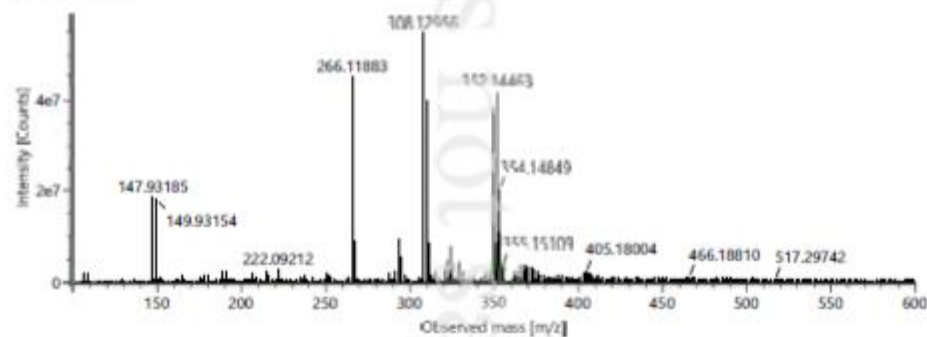

Supplement: d2ob01282k1.pdf [file d2ob01282k1.pdf]
